# Supplementary material
Source: publisher figshare collection journal article supplement (https://diabetesjournals.figshare.com/articles/dataset/_/21830886)
Supplement: Supplementary file 1 [file 1]

## Sheet: Supp Tbl1
Supplemental Table 1. Missingness by protein across batch for proteomics analysis.
Protein		Missing (n)	Measured (n)
Batch 1
Leptin		2	195
Batch 2
Leptin		2	682
Adiponectin		9	682
Alkaline Phosphatase--bone specific		681	682
C1s		681	682
Desmoglein 2		681	682
DR3		681	682
RTN4		681	682
Batch 3
Leptin		1	436
Adiponectin		1	436
Alkaline Phosphatase--bone specific		436	436
C1s		436	436
Desmoglein 2		436	436
DR3		436	436
RTN4		436	436

## Sheet: Supp Tbl2
Supplemental Table 2. Protein-specific inter and intra-assay CVs across and within batches.
						Batch 1		Batch 2		Batch 3		Overall
Entrez Gene Symbol	Apatmer ID	Soma ID	Protein	Protein Full Name	UniProt ID	Inter-Assay CV	Intra-Assay CV	Inter-Assay CV	Intra-Assay CV	Inter-Assay CV	Intra-Assay CV	Inter-Assay CV	Intra-Assay CV
NOTCH3	5108-72	SL005209	Notch-3	Neurogenic locus notch homolog protein 3	Q9UM47	0.0210634	0.0483035	0.0266165	0.070881	0.013403	0.0379517	0.0210634	0.0483035
TGFB3	3520-58	SL000089	TGF-b3	Transforming growth factor beta-3	P10600	0.0405598	0.0303941	0.0261984	0.0479909	0.0235548	0.0360395	0.0405598	0.0303941
NTRK3	2658-27	SL004639	TrkC	NT-3 growth factor receptor	Q16288	0.028554	0.0748396	0.0242916	0.0455609	0.0659833	0.0542189	0.028554	0.0748396
S100A4	14116-129	SL004821	S100A4	Protein S100-A4	P26447	0.0178873	0.0613729	0.02199	0.0302699	0.0166591	0.033293	0.0178873	0.0613729
ADIPOQ	3554-24	SL004258	Adiponectin	Adiponectin	Q15848	0.132342	0.174621	0.0706688	0.148237	0.0636508	0.0679902	0.132342	0.174621
LRRTM1	4452-9	SL014096	LRRT1	Leucine-rich repeat transmembrane neuronal protein 1	Q86UE6	0.0402325	0.0496477	0.0143295	0.0550758	0.0228862	0.0601294	0.0402325	0.0496477
LDHB	3890-8	SL000493	LDH-H 1	L-lactate dehydrogenase B chain	P07195	0.0582054	0.091859	0.0357457	0.0847575	0.0461287	0.113993	0.0582054	0.091859
H2AFZ	4163-5	SL002093	Histone H2A.z	Histone H2A.z	P0C0S5	0.0195199	0.0617871	0.0374846	0.0487452	0.0343792	0.0365634	0.0195199	0.0617871
S100A9	5339-49	SL004477	calgranulin B	Protein S100-A9	P06702	0.0257963	0.15128	0.023093	0.0488325	0.0250856	0.0393505	0.0257963	0.15128
IL12RB2	3815-14	SL007620	IL-12 RB2	Interleukin-12 receptor subunit beta-2	Q99665	0.0198479	0.0357172	0.0137	0.0359859	0.0229753	0.0371025	0.0198479	0.0357172
IL2RA	3151-6	SL003305	IL-2 sRa	Interleukin-2 receptor subunit alpha	P01589	0.0195402	0.0271951	0.0149587	0.0370941	0.0179802	0.0563163	0.0195402	0.0271951
RXFP1	14135-3	SL020172	RXFP1	Relaxin receptor 1	Q9HBX9	0.0225933	0.17438	0.0239944	0.0391745	0.0253591	0.029562	0.0225933	0.17438
CRYZL1	9207-60	SL018887	QORL1	Quinone oxidoreductase-like protein 1	O95825	0.0287723	0.168416	0.0396209	0.0587686	0.0392958	0.0324628	0.0287723	0.168416
TFPI	3336-50	SL001998	TFPI	Tissue factor pathway inhibitor	P10646	0.0400991	0.215797	0.0356711	0.0398587	0.0215528	0.0309464	0.0400991	0.215797
CFH	4159-130	SL000415	Factor H	Complement factor H	P08603	0.0615346	0.0402188	0.0287478	0.0851477	0.0339582	0.045562	0.0615346	0.0402188
ARTN	2939-10	SL004670	Artemin	Artemin	Q5T4W7	0.027989	0.249755	0.0238041	0.0329333	0.0206865	0.0295791	0.027989	0.249755
MMP7	2789-26	SL000525	MMP-7	Matrilysin	P09237	0.0482829	0.124231	0.0583902	0.0904427	0.0622642	0.0656701	0.0482829	0.124231
FABP5	4985-11	SL005352	FABPE	Fatty acid-binding protein, epidermal	Q01469	0.0171521	0.0939004	0.0146945	0.032302	0.0226257	0.0335063	0.0171521	0.0939004
KLK5	3201-49	SL003863	kallikrein 5	Kallikrein-5	Q9Y337	0.0385109	0.0499606	0.020434	0.0833637	0.0305757	0.0552903	0.0385109	0.0499606
APOE	2418-55	SL000276	Apo E	Apolipoprotein E	P02649	0.0519998	0.22519	0.0473992	0.110033	0.0171171	0.0744272	0.0519998	0.22519
IL18R1	3446-7	SL004152	IL-18 Ra	Interleukin-18 receptor 1	Q13478	0.0225609	0.042668	0.0154487	0.037879	0.00908138	0.0200634	0.0225609	0.042668
FABP3	5437-63	SL001774	FABP	Fatty acid-binding protein, heart	P05413	0.0190328	0.0465193	0.0190986	0.0290235	0.017359	0.0269625	0.0190328	0.0465193
GHR	2948-58	SL005168	Growth hormone receptor	Growth hormone receptor	P10912	0.0204	0.189206	0.0347743	0.0385262	0.014829	0.0308462	0.0204	0.189206
INS	4883-56	SL000021	Insulin	Insulin	P01308	0.0460759	0.223305	0.0220401	0.0513521	0.0356153	0.0583047	0.0460759	0.223305
RET	3220-40	SL010378	RET	Proto-oncogene tyrosine-protein kinase receptor Ret	P07949	0.0225861	0.429589	0.0241657	0.02428	0.0214647	0.0256543	0.0225861	0.429589
CNTN1	2974-61	SL004855	contactin-1	Contactin-1	Q12860	0.0677047	0.133295	0.0278971	0.0974422	0.0273096	0.0620592	0.0677047	0.133295
IGFBP1	2771-35	SL000462	IGFBP-1	Insulin-like growth factor-binding protein 1	P08833	0.0115382	0.563683	0.0208413	0.0301457	0.0171362	0.0241366	0.0115382	0.563683
FGF7	4487-1	SL001691	FGF7	Fibroblast growth factor 7	P21781	0.0208666	0.0339223	0.0219003	0.0420082	0.0347889	0.0507611	0.0208666	0.0339223
NRG4	14139-16	SL007828	NRG4	Neuregulin-4	Q8WWG1	0.0190981	0.0236449	0.0278018	0.0369759	0.0202602	0.0238833	0.0190981	0.0236449
IGFBP2	8469-41	SL000466	IGFBP-2	Insulin-like growth factor-binding protein 2	P18065	0.0294378	0.217182	0.0275276	0.0607107	0.0215377	0.0423086	0.0294378	0.217182
PDGFA	4499-21	SL000535	PDGF-AA	Platelet-derived growth factor subunit A	P04085	0.0358293	0.388254	0.0225495	0.0429306	0.0343741	0.0575739	0.0358293	0.388254
FGR	3810-50	SL006912	FGR	Tyrosine-protein kinase Fgr	P09769	0.0173009	0.0630492	0.0223301	0.0394121	0.0301496	0.0321432	0.0173009	0.0630492
MMP3	2788-55	SL000524	MMP-3	Stromelysin-1	P08254	0.0641403	0.0796877	0.0488174	0.111871	0.0646258	0.0720115	0.0641403	0.0796877
EIF5	2612-5	SL004759	eIF-5	Eukaryotic translation initiation factor 5	P55010	0.0265585	0.102546	0.0166216	0.0315598	0.019518	0.0261918	0.0265585	0.102546
EHMT2	5843-60	SL003542	NG36	Histone-lysine N-methyltransferase EHMT2	Q96KQ7	0.0277085	0.0315963	0.0229729	0.056345	0.027849	0.0455675	0.0277085	0.0315963
CCL25	2705-5	SL003197	TECK	C-C motif chemokine 25	O15444	0.0209929	0.153969	0.0431983	0.0381988	0.0228582	0.0345093	0.0209929	0.153969
ACY1	3343-1	SL005574	Aminoacylase-1	Aminoacylase-1	Q03154	0.0190412	0.288722	0.0150801	0.022747	0.0376384	0.0476872	0.0190412	0.288722
F9	5307-12	SL004400	Coagulation Factor IXab	Coagulation factor IXab	P00740	0.0355646	0.0525028	0.0127628	0.0242902	0.011481	0.0536123	0.0355646	0.0525028
AIMP1	2714-78	SL003334	EMAP-2	Endothelial monocyte-activating polypeptide 2	Q12904	0.0558481	0.627083	0.0289469	0.10431	0.0334684	0.0644115	0.0558481	0.627083
MAP2K1	2864-2	SL003793	MEK1	Dual specificity mitogen-activated protein kinase kinase 1	Q02750	0.0257055	0.0341501	0.0237665	0.0488745	0.0344613	0.039847	0.0257055	0.0341501
HIST1H1C	2987-37	SL005256	Histone H1.2	Histone H1.2	P16403	0.0380105	0.145422	0.072677	0.0578277	0.067917	0.0456481	0.0380105	0.145422
IGFBP4	2950-57	SL005171	IGFBP-4	Insulin-like growth factor-binding protein 4	P22692	0.0562498	0.192391	0.0521748	0.0730895	0.0637123	0.0618686	0.0562498	0.192391
ITGAV ITGB5	4917-62	SL003182	Integrin aVb5	Integrin alpha-V: beta-5 complex	P06756, P18084	0.0249996	0.42091	0.0237422	0.0450667	0.0187555	0.0326455	0.0249996	0.42091
BDNF	2421-7	SL003951	BDNF	Brain-derived neurotrophic factor	P23560	0.0238837	0.250911	0.0234805	0.0402108	0.0176207	0.0269855	0.0238837	0.250911
PSMD7	3898-5	SL007266	PSD7	26S proteasome non-ATPase regulatory subunit 7	P51665	0.037304	0.0403132	0.0174868	0.0432123	0.0182894	0.0374028	0.037304	0.0403132
PPBP	4544-4	SL004708	CTAP-III	Connective tissue-activating peptide III	P02775	0.0478202	0.408779	0.0326606	0.0887699	0.0200589	0.049936	0.0478202	0.408779
CD84	3642-4	SL008588	SLAF5	SLAM family member 5	Q9UIB8	0.0265004	0.0511438	0.0187088	0.0305402	0.0333051	0.0434857	0.0265004	0.0511438
ANGPT2	2602-2	SL001996	Angiopoietin-2	Angiopoietin-2	O15123	0.0555044	0.142969	0.0324495	0.0547798	0.0447616	0.0633019	0.0555044	0.142969
CRP	4337-49	SL000051	CRP	C-reactive protein	P02741	0.049117	0.533191	0.0497901	0.0599558	0.0555262	0.052372	0.049117	0.533191
LAMA1 LAMB1 LAMC1	2728-62	SL000497	Laminin	Laminin	P25391, P07942, P11047	0.0612579	0.0685883	0.0504452	0.0899514	0.0626403	0.0776568	0.0612579	0.0685883
PLAT	2212-69	SL000053	tPA	Tissue-type plasminogen activator	P00750	0.0503431	0.0967205	0.0385452	0.357505	0.0449021	0.185937	0.0503431	0.0967205
PPBP	2790-54	SL003191	NAP-2	Neutrophil-activating peptide 2	P02775	0.0701479	0.406884	0.0321803	0.0881384	0.0370178	0.0539778	0.0701479	0.406884
PF4	2697-7	SL003041	PF-4	Platelet factor 4	P02776	0.0442368	0.567763	0.0291659	0.091489	0.0281315	0.0562518	0.0442368	0.567763
HIST1H3A	14146-92	SL008158	H31	Histone H3.1	P68431	0.0219685	0.0827904	0.0281633	0.0911668	0.0634925	0.0920654	0.0219685	0.0827904
CXCL12	3516-60	SL004712	SDF-1	Stromal cell-derived factor 1	P48061	0.0146988	0.0269989	0.0217401	0.0244156	0.0165004	0.0236868	0.0146988	0.0269989
PTPN6	4318-12	SL004940	PTP-1C	Tyrosine-protein phosphatase non-receptor type 6	P29350	0.0171722	0.0398503	0.0362124	0.0434121	0.0173051	0.0274835	0.0171722	0.0398503
UBE2G2	9199-6	SL018946	UB2G2	Ubiquitin-conjugating enzyme E2 G2	P60604	0.0316937	0.0565922	0.0285958	0.0405399	0.0369717	0.0337303	0.0316937	0.0565922
RTN4R	5105-2	SL005208	Nogo Receptor	Reticulon-4 receptor	Q9BZR6	0.0212357	0.0619542	0.0293469	0.0403021	0.0244846	0.0284063	0.0212357	0.0619542
TOP1	2876-74	SL004305	Topoisomerase I	DNA topoisomerase 1	P11387	0.0191301	0.0450532	0.0229722	0.0289656	0.0117753	0.0262076	0.0191301	0.0450532
SCGB2A1	5001-6	SL001973	Mammaglobin 2	Mammaglobin-B	O75556	0.0419908	0.0705393	0.0416828	0.0651421	0.0581426	0.0420116	0.0419908	0.0705393
APP	3171-57	SL004469	amyloid precursor protein	Amyloid beta A4 protein	P05067	0.0221304	0.325878	0.0170551	0.0359989	0.0265911	0.0263402	0.0221304	0.325878
ERP29	4983-6	SL003522	ERP29	Endoplasmic reticulum resident protein 29	P30040	0.0337169	0.0785792	0.0345905	0.0372206	0.0368741	0.0523207	0.0337169	0.0785792
BMP1	3348-49	SL003994	BMP-1	Bone morphogenetic protein 1	P13497	0.0341874	0.0462794	0.0377893	0.0563765	0.0548886	0.0773123	0.0341874	0.0462794
SPARC	3043-49	SL000532	ON	SPARC	P09486	0.0208307	0.328123	0.0256987	0.0423828	0.0291965	0.0319931	0.0208307	0.328123
KLKB1	4152-58	SL000545	Prekallikrein	Plasma kallikrein	P03952	0.0984781	0.168185	0.0178869	0.0601606	0.040296	0.0863679	0.0984781	0.168185
PTGS2	3761-4	SL000027	COX-2	Prostaglandin G/H synthase 2	P35354	0.0130455	0.134684	0.0277333	0.0818964	0.0241515	0.0887507	0.0130455	0.134684
SIGLEC7	2742-68	SL005218	Siglec-7	Sialic acid-binding Ig-like lectin 7	Q9Y286	0.0211842	0.0593915	0.0229026	0.0361601	0.0242759	0.0238395	0.0211842	0.0593915
UCHL1	5019-16	SL002803	PGP9.5	Ubiquitin carboxyl-terminal hydrolase isozyme L1	P09936	0.0393915	0.258911	0.0559046	0.0524519	0.0742497	0.0851551	0.0393915	0.258911
CASP3	3593-72	SL003711	Caspase-3	Caspase-3	P42574	0.0324936	0.243379	0.0393304	0.0730112	0.0255938	0.0650218	0.0324936	0.243379
F9	4876-32	SL000357	Coagulation Factor IX	Coagulation factor IX	P00740	0.0208593	0.0457123	0.0201568	0.0321401	0.014062	0.0538444	0.0208593	0.0457123
CDH1	2501-51	SL000055	Cadherin E	Cadherin-1	P12830	0.0666127	0.0547496	0.0576903	0.0707842	0.0423097	0.0541976	0.0666127	0.0547496
STUB1	10336-3	SL019100	CHIP	E3 ubiquitin-protein ligase CHIP	Q9UNE7	0.0367616	0.0936449	0.025076	0.0689016	0.0331202	0.0701035	0.0367616	0.0936449
SERPINA1	3580-25	SL000249	a1-Antitrypsin	Alpha-1-antitrypsin	P01009	0.0533747	0.063871	0.0323719	0.0564923	0.0235604	0.0741051	0.0533747	0.063871
LCMT1	4237-70	SL011770	LCMT1	Leucine carboxyl methyltransferase 1	Q9UIC8	0.0225502	0.0276051	0.0258729	0.0376315	0.0337358	0.0269456	0.0225502	0.0276051
LTF	2780-35	SL000496	Lactoferrin	Lactotransferrin	P02788	0.0327723	0.12337	0.020022	0.132584	0.0160883	0.0318554	0.0327723	0.12337
KPNB1	3887-90	SL010927	IMB1	Importin subunit beta-1	Q14974	0.0378932	0.145067	0.0331458	0.0728367	0.0421996	0.0647605	0.0378932	0.145067
PFDN5	4271-75	SL006705	PFD5	Prefoldin subunit 5	Q99471	0.0221469	0.0379771	0.0171689	0.0414896	0.031387	0.0431913	0.0221469	0.0379771
FTCD	9213-24	SL018900	FTCD	Formimidoyltransferase-cyclodeaminase	O95954	0.23748	0.441314	0.284452	0.309317	0.284246	0.28976	0.23748	0.441314
SERPINC1	3344-60	SL000272	Antithrombin III	Antithrombin-III	P01008	0.0862381	0.0733902	0.0484128	0.0766173	0.0426504	0.0632613	0.0862381	0.0733902
AFM	4763-31	SL004742	Afamin	Afamin	P43652	0.0509655	0.0708619	0.0207096	0.0561595	0.0333084	0.0815708	0.0509655	0.0708619
STK17B	5249-31	SL016566	DRAK2	Serine/threonine-protein kinase 17B	O94768	0.0323614	0.0305561	0.0171358	0.0382762	0.0239178	0.0552331	0.0323614	0.0305561
ANGPT1	2811-27	SL001995	Angiopoietin-1	Angiopoietin-1	Q15389	0.0211921	0.227019	0.0131934	0.0310809	0.0234032	0.0304474	0.0211921	0.227019
HTRA2	3317-33	SL004860	HTRA2	Serine protease HTRA2, mitochondrial	O43464	0.0412575	0.0549138	0.0251247	0.0383442	0.0305933	0.0435076	0.0412575	0.0549138
CRK	4976-57	SL013240	CRK	Adapter molecule crk	P46108	0.0284522	0.191514	0.0233184	0.0344774	0.0214213	0.032529	0.0284522	0.191514
SET	5364-7	SL007336	SET	Protein SET	Q01105	0.112462	0.120827	0.0318213	0.288733	0.0234901	0.0560564	0.112462	0.120827
TYK2	5260-80	SL007181	TYK2	Non-receptor tyrosine-protein kinase TYK2	P29597	0.0449709	0.0877432	0.0329465	0.0525871	0.0394127	0.0337269	0.0449709	0.0877432
CCL5	5480-49	SL000563	RANTES	C-C motif chemokine 5	P13501	0.0509503	0.494327	0.0512166	0.0573866	0.0510456	0.0388694	0.0509503	0.494327
PPIF	5248-68	SL005793	Cyclophilin F	Peptidyl-prolyl cis-trans isomerase F, mitochondrial	P30405	0.0512182	0.296621	0.0600016	0.138916	0.0667555	0.0627004	0.0512182	0.296621
C4A C4B	2182-54	SL000318	C4b	Complement C4b	P0C0L4 P0C0L5	0.0611484	0.272714	0.053347	0.0843092	0.106783	0.119643	0.0611484	0.272714
BCL2A1	3413-50	SL003703	BFL1	Bcl-2-related protein A1	Q16548	0.0267111	0.0495338	0.0261465	0.0364857	0.0426371	0.0224788	0.0267111	0.0495338
UBB	6641-60	SL017289	PolyUbiquitin K48	PolyUbiquitin K48-linked	P0CG47	0.0139445	0.0782796	0.0120735	0.0430425	0.0205103	0.0324437	0.0139445	0.0782796
CSNK2A1 CSNK2B	5225-50	SL016550	CK2-A1:B	Casein kinase II 2-alpha:2-beta heterotetramer	P68400 P67870	0.0359127	0.0789882	0.0299507	0.063172	0.0332857	0.0638196	0.0359127	0.0789882
CCL26	9168-31	SL003170	Eotaxin-3	C-C motif chemokine 26	Q9Y258	0.0338889	0.0650692	0.0173917	0.054674	0.0262277	0.0596153	0.0338889	0.0650692
GSTP1	4911-49	SL003643	Glutathione S-transferase Pi	Glutathione S-transferase P	P09211	0.0481364	0.0559261	0.0353693	0.0605457	0.0370807	0.0445864	0.0481364	0.0559261
SHBG	4929-55	SL005102	SHBG	Sex hormone-binding globulin	P04278	0.017189	0.54236	0.0219626	0.0917521	0.0262554	0.213399	0.017189	0.54236
IDS	3198-4	SL008639	IDS	Iduronate 2-sulfatase	P22304	0.0385003	0.10361	0.0264007	0.0343935	0.0350295	0.0339174	0.0385003	0.10361
GFRA1	3314-74	SL004858	GFRa-1	GDNF family receptor alpha-1	P56159	0.0170271	0.0677828	0.017934	0.0253789	0.019814	0.024855	0.0170271	0.0677828
TNF	5936-53	SL002517	TNF-a	Tumor necrosis factor	P01375	0.0175151	0.0423983	0.0175134	0.0373925	0.0236594	0.0369437	0.0175151	0.0423983
NID2	3633-70	SL008193	NID2	Nidogen-2	Q14112	0.025013	0.0937895	0.0245288	0.0342935	0.0210603	0.0445848	0.025013	0.0937895
FCN3	5462-62	SL002086	Ficolin-3	Ficolin-3	O75636	0.105066	0.524597	0.0835033	0.18517	0.0429051	0.116276	0.105066	0.524597
HSD17B1	4708-3	SL004253	17-beta-HSD 1	Estradiol 17-beta-dehydrogenase 1	P14061	0.0239209	0.0570216	0.0272249	0.0515805	0.0161775	0.0655461	0.0239209	0.0570216
PROS1	2700-56	SL000049	Protein S	Vitamin K-dependent protein S	P07225	0.0549553	0.134679	0.0225278	0.119309	0.0712784	0.10512	0.0549553	0.134679
PAFAH1B2	2642-4	SL004760	PAFAH beta subunit	Platelet-activating factor acetylhydrolase IB subunit beta	P68402	0.0529567	0.083315	0.0318048	0.0457146	0.0373619	0.0359629	0.0529567	0.083315
TNNT2	5315-22	SL000052	Troponin T	Troponin T, cardiac muscle	P45379	0.0292905	0.0656383	0.0147705	0.0373247	0.0236456	0.0515321	0.0292905	0.0656383
HMGB1	2524-56	SL003280	HMG-1	High mobility group protein B1	P09429	0.0160082	0.0675922	0.0215081	0.038182	0.0151426	0.0278878	0.0160082	0.0675922
XPNPEP1	3481-87	SL011073	XPNPEP1	Xaa-Pro aminopeptidase 1	Q9NQW7	0.0365122	0.092524	0.0281135	0.0380521	0.0318335	0.0428872	0.0365122	0.092524
NSFL1C	4250-23	SL006268	NSF1C	NSFL1 cofactor p47	Q9UNZ2	0.0234514	0.125853	0.0312317	0.0745733	0.0517424	0.074651	0.0234514	0.125853
WFIKKN2	3235-50	SL010391	WFKN2	WAP, Kazal, immunoglobulin, Kunitz and NTR domain-containing protein 2	Q8TEU8	0.0344244	0.0593501	0.0280525	0.0430051	0.052005	0.0449658	0.0344244	0.0593501
TAGLN2	9201-13	SL004811	Transgelin-2	Transgelin-2	P37802	0.0297687	0.0593727	0.0141391	0.0313027	0.0230496	0.0329316	0.0297687	0.0593727
VEGFC	3132-1	SL004486	VEGF-C	Vascular endothelial growth factor C	P49767	0.0132274	0.0442547	0.0282889	0.0364927	0.0154914	0.036557	0.0132274	0.0442547
PRKACA	3466-8	SL010513	PRKACA	cAMP-dependent protein kinase catalytic subunit alpha	P17612	0.0281769	0.141683	0.0334932	0.0662466	0.0331217	0.0623395	0.0281769	0.141683
PDGFB	4149-8	SL000537	PDGF-BB	Platelet-derived growth factor subunit B	P01127	0.0228214	0.445567	0.0259271	0.0539873	0.0344179	0.0394154	0.0228214	0.445567
CFI	2567-5	SL003328	Factor I	Complement factor I	P05156	0.0578372	0.0587639	0.0255129	0.100882	0.0282578	0.0670632	0.0578372	0.0587639
CD200	5112-73	SL014268	OX2G	OX-2 membrane glycoprotein	P41217	0.0211614	0.0322546	0.0213288	0.0248339	0.0306504	0.028734	0.0211614	0.0322546
GRB2	5464-52	SL003792	GRB2 adapter protein	Growth factor receptor-bound protein 2	P62993	0.0185937	0.224182	0.0309295	0.0441868	0.03322	0.034049	0.0185937	0.224182
HK2	13130-150	SL007272	HXK2	Hexokinase-2	P52789	0.0212784	0.143445	0.0160874	0.038611	0.0194062	0.0466775	0.0212784	0.143445
FGF17	3494-71	SL004335	FGF-17	Fibroblast growth factor 17	O60258	0.0188801	0.0456625	0.0280971	0.047869	0.0287095	0.0377817	0.0188801	0.0456625
LTA4H	3204-2	SL007100	LKHA4	Leukotriene A-4 hydrolase	P09960	0.023351	0.0596594	0.0401755	0.198012	0.0395817	0.0672211	0.023351	0.0596594
SCARF1	5129-12	SL005221	SREC-I	Scavenger receptor class F member 1	Q14162	0.0228267	0.079237	0.0129088	0.0300624	0.0384409	0.0560648	0.0228267	0.079237
YWHAB	14156-33	SL004815	14-3-3 protein beta/alpha	14-3-3 protein beta/alpha	P31946	0.0277959	0.0529964	0.0235211	0.0606922	0.0264171	0.0383602	0.0277959	0.0529964
EPS15L1	4212-5	SL012188	EP15R	Epidermal growth factor receptor substrate 15-like 1	Q9UBC2	0.0251817	0.111678	0.0226272	0.0513673	0.0235079	0.0454785	0.0251817	0.111678
MMP12	4496-60	SL000522	MMP-12	Macrophage metalloelastase	P39900	0.0241854	0.0396162	0.0231581	0.0302895	0.0321613	0.04481	0.0241854	0.0396162
HGFAC	3617-80	SL006512	HGFA	Hepatocyte growth factor activator	Q04756	0.0256435	0.0776971	0.0237357	0.0613681	0.0269706	0.0294333	0.0256435	0.0776971
YWHAZ	5858-6	SL005688	14-3-3 protein zeta/delta	14-3-3 protein zeta/delta	P63104	0.0231901	0.132839	0.0523933	0.0974072	0.0570354	0.039748	0.0231901	0.132839
PROK1	2247-20	SL004332	EG-VEGF	Prokineticin-1	P58294	0.0364473	0.0674541	0.0253622	0.0391615	0.0166282	0.0365319	0.0364473	0.0674541
SPP1	13113-7	SL002688	Osteopontin	Osteopontin	P10451	0.0295128	0.319292	0.0144246	0.0419683	0.0446119	0.0654569	0.0295128	0.319292
SOD1	2794-60	SL000581	SOD	Superoxide dismutase [Cu-Zn]	P00441	0.0272499	0.0329127	0.0201462	0.050709	0.025851	0.0440087	0.0272499	0.0329127
CDH3	2643-57	SL004183	P-Cadherin	Cadherin-3	P22223	0.051944	0.0583802	0.048796	0.0641226	0.0342191	0.0584529	0.051944	0.0583802
ATP5O	9202-309	SL008113	ATPO	ATP synthase subunit O, mitochondrial	P48047	0.0196045	0.173071	0.0605044	0.179711	0.0505683	0.0797244	0.0196045	0.173071
ANXA6	5335-73	SL003647	annexin VI	Annexin A6	P08133	0.0702301	0.47868	0.0713365	0.138445	0.0642441	0.0472085	0.0702301	0.47868
TPM4	7660-21	SL003646	Tropomyosin 4	Tropomyosin alpha-4 chain	P67936	0.0460731	0.156054	0.0615733	0.116363	0.0625885	0.059329	0.0460731	0.156054
SERPINF1	9211-19	SL003066	PEDF	Pigment epithelium-derived factor	P36955	0.0790954	0.0764023	0.0383335	0.0841428	0.0290445	0.0473752	0.0790954	0.0764023
SFTPD	4414-69	SL004484	SP-D	Pulmonary surfactant-associated protein D	P35247	0.0278309	0.0794983	0.040984	0.0384056	0.0314666	0.0293677	0.0278309	0.0794983
PTPN11	3397-7	SL010616	SHP-2	Tyrosine-protein phosphatase non-receptor type 11	Q06124	0.0162273	0.0327209	0.0304207	0.0431738	0.0387352	0.0395289	0.0162273	0.0327209
PDIA3	4719-58	SL003524	Protein disulfide isomerase A3	Protein disulfide-isomerase A3	P30101	0.0344118	0.0633657	0.0147946	0.0386664	0.031754	0.0458474	0.0344118	0.0633657
TIMP2	2278-61	SL000592	TIMP-2	Metalloproteinase inhibitor 2	P16035	0.0399657	0.0506861	0.0276146	0.0606709	0.0215853	0.0332611	0.0399657	0.0506861
NID1	3213-65	SL000640	Nidogen	Nidogen-1	P14543	0.0298888	0.102295	0.0240009	0.0293041	0.0282327	0.028717	0.0298888	0.102295
CKB CKM	3714-49	SL000382	CK-MB	Creatine kinase M-type:Creatine kinase B-type heterodimer	P12277 P06732	0.0578157	0.0645369	0.011026	0.0316992	0.0200523	0.0216469	0.0578157	0.0645369
PRKCG	5476-66	SL000556	PKC-G	Protein kinase C gamma type	P05129	0.0130427	0.0387945	0.0297084	0.0581077	0.0246686	0.0506723	0.0130427	0.0387945
PPIA	3844-2	SL004823	Cyclophilin A	Peptidyl-prolyl cis-trans isomerase A	P62937	0.0470923	0.0881465	0.0677328	0.078849	0.0509995	0.0407903	0.0470923	0.0881465
FGF1	3486-58	SL000299	b-ECGF	Fibroblast growth factor 1	P05230	0.0304221	0.0793958	0.0181034	0.0391602	0.0245176	0.0502918	0.0304221	0.0793958
NTN4	3327-27	SL007673	NET4	Netrin-4	Q9HB63	0.0227382	0.0967313	0.0271299	0.0324132	0.0180452	0.0359412	0.0227382	0.0967313
CA3	3799-11	SL004867	Carbonic anhydrase III	Carbonic anhydrase 3	P07451	0.0230292	0.108309	0.0268991	0.0356889	0.0231884	0.033902	0.0230292	0.108309
PSMA2	4280-47	SL008865	PSA2	Proteasome subunit alpha type-2	P25787	0.017805	0.0352855	0.0317722	0.0342957	0.0309929	0.0303026	0.017805	0.0352855
ENG	4908-6	SL004482	Endoglin	Endoglin	P17813	0.0286542	0.0890947	0.017419	0.0372821	0.0467226	0.0569648	0.0286542	0.0890947
ADAMTS4	2809-25	SL004625	ADAMTS-4	A disintegrin and metalloproteinase with thrombospondin motifs 4	O75173	0.0299127	0.0732755	0.0257493	0.0381498	0.027772	0.0593789	0.0299127	0.0732755
CHL1	3601-54	SL008936	CHL1	Neural cell adhesion molecule L1-like protein	O00533	0.0206764	0.0932836	0.015732	0.0256423	0.0255798	0.028642	0.0206764	0.0932836
SNX4	3903-49	SL005372	Sorting nexin 4	Sorting nexin-4	O95219	0.0137025	0.233319	0.0208916	0.0458269	0.0164594	0.0269555	0.0137025	0.233319
CFB	4129-72	SL000414	Factor B	Complement factor B	P00751	0.0703033	0.0631569	0.032851	0.0506401	0.0298867	0.113597	0.0703033	0.0631569
METAP2	3170-6	SL007261	AMPM2	Methionine aminopeptidase 2	P50579	0.0300556	0.049647	0.0237418	0.0890498	0.0212307	0.0678574	0.0300556	0.049647
TNFSF9	2599-51	SL003735	4-1BB ligand	Tumor necrosis factor ligand superfamily member 9	P41273	0.0230283	0.0359511	0.022021	0.0282853	0.0189977	0.0403611	0.0230283	0.0359511
TNFAIP6	5036-50	SL004782	TSG-6	Tumor necrosis factor-inducible gene 6 protein	P98066	0.0243513	0.0506978	0.025049	0.038146	0.0331606	0.0386369	0.0243513	0.0506978
AFP	5792-8	SL000011	AFP	alpha-Fetoprotein	P02771	0.0286756	0.0543065	0.0331032	0.0506803	0.0277125	0.0381577	0.0286756	0.0543065
CXCL1	2985-35	SL003173	Gro-a	Growth-regulated alpha protein	P09341	0.0215108	0.0459703	0.0112636	0.0467274	0.0143754	0.0442077	0.0215108	0.0459703
NOTCH2	5106-52	SL007356	NOTC2	Neurogenic locus notch homolog protein 2	Q04721	0.0164851	0.145756	0.0282267	0.0406799	0.0240207	0.0367565	0.0164851	0.145756
IL1RN	5353-89	SL001990	IL-1Ra	Interleukin-1 receptor antagonist protein	P18510	0.0272589	0.021813	0.0235202	0.0382725	0.0219293	0.0418763	0.0272589	0.021813
GNLY	3195-50	SL000678	Granulysin	Granulysin	P22749	0.0210581	0.0746063	0.0199276	0.0325254	0.0160345	0.0266435	0.0210581	0.0746063
TF	4162-54	SL000601	Transferrin	Serotransferrin	P02787	0.0828459	0.0751543	0.062887	0.0915451	0.0644087	0.0859469	0.0828459	0.0751543
NRP1	5542-22	SL006397	NRP1	Neuropilin-1	O14786	0.0478664	0.0894208	0.0252384	0.0592789	0.0489534	0.0660416	0.0478664	0.0894208
APOM	14125-5	SL004747	ApoM	Apolipoprotein M	O95445	0.0278096	0.0663225	0.0170515	0.0404045	0.030583	0.0290729	0.0278096	0.0663225
CHRDL1	3362-61	SL009400	CRDL1	Chordin-like protein 1	Q9BU40	0.0242094	0.0968762	0.0163964	0.0356496	0.0289349	0.0305207	0.0242094	0.0968762
ESM1	3805-16	SL010458	Endocan	Endothelial cell-specific molecule 1	Q9NQ30	0.018991	0.0413549	0.017632	0.0424262	0.0147519	0.0287662	0.018991	0.0413549
SNCA	8458-111	SL005266	a-Synuclein	Alpha-synuclein	P37840	0.0748659	0.0944731	0.0475137	0.062157	0.0713318	0.051803	0.0748659	0.0944731
THBS1	3474-19	SL002705	Thrombospondin-1	Thrombospondin-1	P07996	0.0426408	0.444854	0.0344234	0.0472112	0.0428755	0.0608991	0.0426408	0.444854
TNFRSF10D	14121-24	SL004159	TRAIL R4	Tumor necrosis factor receptor superfamily member 10D	Q9UBN6	0.0368167	0.0445426	0.0359924	0.0577145	0.0457753	0.0581011	0.0368167	0.0445426
RPSA	4957-1	SL004605	40S ribosomal protein SA	40S ribosomal protein SA	P08865	0.0224518	0.110407	0.0221215	0.0368824	0.0259682	0.0308321	0.0224518	0.110407
UFM1	3836-51	SL010528	UFM1	Ubiquitin-fold modifier 1	P61960	0.0299446	0.206769	0.025059	0.0444185	0.0452604	0.0455681	0.0299446	0.206769
CCL21	2516-57	SL003193	6Ckine	C-C motif chemokine 21	O00585	0.0443287	0.037961	0.0263983	0.0390952	0.0157144	0.0308622	0.0443287	0.037961
BIRC5	3472-40	SL000582	Survivin	Baculoviral IAP repeat-containing protein 5	O15392	0.017638	0.0365501	0.0122438	0.0307271	0.0206038	0.0337894	0.017638	0.0365501
NACA	3854-24	SL011631	NACA	Nascent polypeptide-associated complex subunit alpha	Q13765	0.0428745	0.0466572	0.0237507	0.0764472	0.017835	0.145237	0.0428745	0.0466572
CCL28	2890-59	SL003303	CCL28	C-C motif chemokine 28	Q9NRJ3	0.025576	0.233445	0.037089	0.0615923	0.0366999	0.0597766	0.025576	0.233445
YWHAB,YWHAE,YWHAG,YWHAH,YWHAQ,YWHAZ,SFN	4179-57	SL017611	14-3-3	14-3-3 protein family	P31946, P62258, P61981, Q04917, P27348, P63104, P31947	0.0338321	0.10735	0.0344109	0.0866855	0.0252985	0.043841	0.0338321	0.10735
PCSK7	4459-68	SL014069	PCSK7	Proprotein convertase subtilisin/kexin type 7	Q16549	0.0190845	0.0986643	0.0313075	0.0402951	0.0285324	0.0294672	0.0190845	0.0986643
IGHG1 IGHG2 IGHG3 IGHG4 IGK@ IGL@	2744-57	SL000467	IgG	Immunoglobulin G	P01857	0.0785541	0.184572	0.0838703	0.109251	0.0464398	0.0671525	0.0785541	0.184572
IL4R	3055-54	SL003308	IL-4 sR	Interleukin-4 receptor subunit alpha	P24394	0.0293438	0.091282	0.0142435	0.0301725	0.0169247	0.0421874	0.0293438	0.091282
RSPO2	4566-24	SL013989	RSPO2	R-spondin-2	Q6UXX9	0.0310257	0.0544734	0.0252022	0.0435638	0.0241572	0.0459875	0.0310257	0.0544734
SERPINA3	2879-9	SL000248	a1-Antichymotrypsin	Alpha-1-antichymotrypsin	P01011	0.0867104	0.0606342	0.0599499	0.081824	0.0669474	0.0683506	0.0867104	0.0606342
APCS	2474-54	SL000573	SAP	Serum amyloid P-component	P02743	0.0506914	0.071342	0.0364516	0.0785891	0.0315926	0.0938214	0.0506914	0.071342
MYBPC1	7648-9	SL017328	MYPC1	Myosin-binding protein C, slow-type	Q00872	0.0186098	0.257481	0.0129022	0.0336138	0.0193419	0.0266465	0.0186098	0.257481
EPHA5	3806-55	SL004844	EphA5	Ephrin type-A receptor 5	P54756	0.026131	0.0368936	0.0177589	0.0375518	0.0171458	0.0497693	0.026131	0.0368936
NME2	4249-64	SL004921	NDP kinase B	Nucleoside diphosphate kinase B	P22392	0.0295811	0.111944	0.0376625	0.0817923	0.0493876	0.0373847	0.0295811	0.111944
APOA1	2750-3	SL000019	Apo A-I	Apolipoprotein A-I	P02647	0.0548335	0.0519559	0.0687976	0.071161	0.0434958	0.0661707	0.0548335	0.0519559
IL1R1	2991-9	SL001997	IL-1 sRI	Interleukin-1 receptor type 1	P14778	0.0404011	0.0423985	0.0212416	0.0524294	0.0387764	0.0644082	0.0404011	0.0423985
FGF6	4130-71	SL004340	FGF-6	Fibroblast growth factor 6	P10767	0.0244069	0.123062	0.018605	0.0602537	0.0207845	0.0349119	0.0244069	0.123062
LRP8	3323-37	SL004610	LRP8	Low-density lipoprotein receptor-related protein 8	Q14114	0.0197499	0.0752635	0.0174796	0.0288299	0.0191977	0.0302469	0.0197499	0.0752635
GP6	3194-36	SL008759	GPVI	Platelet glycoprotein VI	Q9HCN6	0.0209215	0.226126	0.0282577	0.0360136	0.0349817	0.0364463	0.0209215	0.226126
C3	2755-8	SL003220	C3adesArg	C3a anaphylatoxin des Arginine	P01024	0.154202	0.178287	0.0946847	0.120615	0.122205	0.0964901	0.154202	0.178287
SOD3	8463-2	SL003672	SOD3	Extracellular superoxide dismutase [Cu-Zn]	P08294	0.0443992	0.0592471	0.0224488	0.0418952	0.0206573	0.0351409	0.0443992	0.0592471
PPIE	5238-26	SL013928	PPIE	Peptidyl-prolyl cis-trans isomerase E	Q9UNP9	0.017873	0.0610012	0.0284554	0.0422423	0.0248505	0.0427612	0.017873	0.0610012
LDLR	13129-40	SL007070	LDLR	Low-density lipoprotein receptor	P01130	0.0361466	0.078591	0.0228475	0.0304424	0.0198991	0.0354847	0.0361466	0.078591
GNS	3616-3	SL008504	GNS	N-acetylglucosamine-6-sulfatase	P15586	0.0237361	0.0369495	0.0326444	0.0556265	0.0475115	0.0596362	0.0237361	0.0369495
IL2RG	2634-2	SL003307	IL-2 sRg	Cytokine receptor common subunit gamma	P31785	0.0164848	0.0650009	0.0229128	0.0370518	0.0244536	0.037379	0.0164848	0.0650009
HINT1	5900-11	SL009431	HINT1	Histidine triad nucleotide-binding protein 1	P49773	0.0235175	0.174513	0.026052	0.0325758	0.0264061	0.042085	0.0235175	0.174513
ICAM1	4342-10	SL002922	sICAM-1	Intercellular adhesion molecule 1	P05362	0.0204087	0.135448	0.0187187	0.0444882	0.0181089	0.0209562	0.0204087	0.135448
TGFBR3	3009-3	SL005059	TGF-b R III	Transforming growth factor beta receptor type 3	Q03167	0.0293528	0.0345415	0.0272678	0.0376669	0.0248522	0.0251367	0.0293528	0.0345415
DBNL	4978-54	SL011628	DBNL	Drebrin-like protein	Q9UJU6	0.018201	0.0284143	0.0310156	0.0439712	0.032857	0.12513	0.018201	0.0284143
BAD	5870-23	SL003700	BAD	Bcl2-associated agonist of cell death	Q92934	0.0163537	0.0335601	0.0120782	0.0479534	0.0244377	0.0402995	0.0163537	0.0335601
EIF5A	5888-29	SL005687	eIF-5A-1	Eukaryotic translation initiation factor 5A-1	P63241	0.0210316	0.0682192	0.0224619	0.0362343	0.0233379	0.0311822	0.0210316	0.0682192
UBC	6647-55	SL017290	PolyUbiquitin K63	PolyUbiquitin K63-linked	P0CG48	0.0150931	0.122849	0.0179832	0.0350949	0.0229174	0.0342062	0.0150931	0.122849
APOE	2937-10	SL004668	Apo E3	Apolipoprotein E (isoform E3)	P02649	0.076852	0.0984315	0.0386192	0.0886123	0.0304825	0.0710228	0.076852	0.0984315
HBA1 HBB	4915-64	SL000836	Hemoglobin	Hemoglobin	P69905, P68871	0.165994	1.40629	0.0702256	0.219185	0.10435	0.0959878	0.165994	1.40629
FGFR1	5532-53	SL003060	bFGF-R	Fibroblast growth factor receptor 1	P11362	0.0504316	0.0664368	0.0323827	0.0381597	0.0508905	0.058866	0.0504316	0.0664368
LEP	8484-24	SL000498	Leptin	Leptin	P41159	0.015849	0.232116	0.0121894	0.0200734	0.0128261	0.0126581	0.015849	0.232116
FASLG	3052-8	SL000633	Fas ligand, soluble	Tumor necrosis factor ligand superfamily member 6, soluble form	P48023	0.0154874	0.125632	0.0188262	0.044287	0.0254046	0.0309986	0.0154874	0.125632
NOG	5846-24	SL004683	Noggin	Noggin	Q13253	0.0239882	0.175455	0.020201	0.0304268	0.0204147	0.0363866	0.0239882	0.175455
PGAM1	3896-5	SL004820	Phosphoglycerate mutase 1	Phosphoglycerate mutase 1	P18669	0.0453786	0.0982137	0.033516	0.0841267	0.0701373	0.0731141	0.0453786	0.0982137
C1QBP	4967-1	SL008177	C1QBP	Complement component 1 Q subcomponent-binding protein, mitochondrial	Q07021	0.0256156	0.0307711	0.0232084	0.0392363	0.0395436	0.0413629	0.0256156	0.0307711
NXPH1	4562-1	SL012457	NXPH1	Neurexophilin-1	P58417	0.0354963	0.0773143	0.0271699	0.0373257	0.0204533	0.0428273	0.0354963	0.0773143
BPI	4126-22	SL004511	BPI	Bactericidal permeability-increasing protein	P17213	0.0275081	0.139327	0.0294749	0.027242	0.0232218	0.0336693	0.0275081	0.139327
TIMP3	2480-58	SL003043	TIMP-3	Metalloproteinase inhibitor 3	P35625	0.0352557	0.467621	0.0218702	0.0370522	0.0446633	0.0556659	0.0352557	0.467621
DLL4	3305-6	SL010457	DLL4	Delta-like protein 4	Q9NR61	0.0352256	0.100319	0.0206298	0.0564494	0.0292059	0.0446554	0.0352256	0.100319
RARRES2	3079-62	SL005152	TIG2	Retinoic acid receptor responder protein 2	Q99969	0.0535231	0.103811	0.0370745	0.198951	0.0218874	0.0553809	0.0535231	0.103811
IL19	3035-80	SL004354	IL-19	Interleukin-19	Q9UHD0	0.0310521	0.0416122	0.0181625	0.0324865	0.0397734	0.0410721	0.0310521	0.0416122
COMMD7	2823-7	SL004704	COMMD7	COMM domain-containing protein 7	Q86VX2	0.0206495	0.101256	0.0180968	0.0363461	0.025245	0.0375088	0.0206495	0.101256
BID	5798-3	SL003704	BID	BH3-interacting domain death agonist	P55957	0.0176949	0.308283	0.0211758	0.0491936	0.0368005	0.0487191	0.0176949	0.308283
CRTAM	5068-54	SL014208	CRTAM	Cytotoxic and regulatory T-cell molecule	O95727	0.0215276	0.0301007	0.0161822	0.0242263	0.0234709	0.0300044	0.0215276	0.0301007
FLT3	3437-80	SL004636	Flt-3	Receptor-type tyrosine-protein kinase FLT3	P36888	0.0292179	0.0808516	0.0374784	0.0492978	0.0382652	0.0462856	0.0292179	0.0808516
PLA2G7	5015-15	SL003440	PAFAH	Platelet-activating factor acetylhydrolase	Q13093	0.0459201	0.168	0.0368385	0.0523351	0.0198675	0.0523258	0.0459201	0.168
LGALS3BP	5000-52	SL006522	LG3BP	Galectin-3-binding protein	Q08380	0.0398627	0.141356	0.0574366	0.0510934	0.0556606	0.058311	0.0398627	0.141356
HMGCR	5230-99	SL016557	HMGR	3-hydroxy-3-methylglutaryl-coenzyme A reductase	P04035	0.0264053	0.149238	0.0298676	0.0394911	0.0283707	0.0403533	0.0264053	0.149238
HSP90AB1	5467-15	SL000454	HSP 90b	Heat shock protein HSP 90-beta	P08238	0.0237552	0.0586749	0.0394961	0.0556921	0.0246604	0.0307608	0.0237552	0.0586749
F3	4931-59	SL000024	TF	Tissue Factor	P13726	0.0275108	0.0270067	0.0206878	0.0303537	0.0220752	0.0345268	0.0275108	0.0270067
FABP1	11516-7	SL006131	FABPL	Fatty acid-binding protein, liver	P07148	0.0221655	0.0565384	0.0274277	0.04142	0.0168801	0.0371587	0.0221655	0.0565384
CKB	3800-71	SL000377	CK-BB	Creatine kinase B-type	P12277	0.0145063	0.241861	0.0204664	0.0497961	0.0172848	0.0278675	0.0145063	0.241861
ENPP7	4435-66	SL009045	ENPP7	Ectonucleotide pyrophosphatase/phosphodiesterase family member 7	Q6UWV6	0.0315625	0.106751	0.0194855	0.0444828	0.0244451	0.0293742	0.0315625	0.106751
SCARB2	5100-53	SL005197	LIMP II	Lysosome membrane protein 2	Q14108	0.0214283	0.0246122	0.0128365	0.02958	0.0191265	0.0272082	0.0214283	0.0246122
PRDX6	5018-68	SL005694	Peroxiredoxin-6	Peroxiredoxin-6	P30041	0.104671	0.104037	0.0455236	0.0852485	0.0554724	0.184211	0.104671	0.104037
CMA1	3423-59	SL005250	Chymase	Chymase	P23946	0.0158702	0.0628699	0.0200285	0.0395091	0.0233742	0.0327034	0.0158702	0.0628699
LRP1	9182-3	SL004733	sLRP1	Low-density lipoprotein receptor-related protein 1, soluble	Q07954	0.0228525	0.106143	0.012216	0.0394334	0.0210509	0.0441574	0.0228525	0.106143
PDK1	5227-60	SL006921	PDK1	[Pyruvate dehydrogenase (acetyl-transferring)] kinase isozyme 1, mitochondrial	Q15118	0.0449323	0.174599	0.0493378	0.0667661	0.0377265	0.045343	0.0449323	0.174599
ARID3A	3875-62	SL011549	ARI3A	AT-rich interactive domain-containing protein 3A	Q99856	0.0233737	0.278493	0.0278023	0.051146	0.0247912	0.0474255	0.0233737	0.278493
CYP3A4	2943-5	SL000398	Cytochrome P450 3A4	Cytochrome P450 3A4	P08684	0.0206948	0.0467194	0.0210655	0.0383152	0.025917	0.0414216	0.0206948	0.0467194
DPP7	3608-12	SL008916	DPP2	Dipeptidyl peptidase 2	Q9UHL4	0.030809	0.0430004	0.0209666	0.0370166	0.040237	0.0570676	0.030809	0.0430004
PLA2G10	2949-6	SL004067	GX	Group 10 secretory phospholipase A2	O15496	0.0207604	0.0694887	0.0187811	0.0381067	0.0275309	0.0284074	0.0207604	0.0694887
BMPR1A	4859-6	SL004080	BMPR1A	Bone morphogenetic protein receptor type-1A	P36894	0.0169202	0.0835941	0.0194821	0.0525508	0.032019	0.0432052	0.0169202	0.0835941
NAPA	4292-5	SL011202	SNAA	Alpha-soluble NSF attachment protein	P54920	0.0237345	0.108096	0.019192	0.059961	0.0318342	0.0328675	0.0237345	0.108096
RBM39	4284-18	SL011535	RBM39	RNA-binding protein 39	Q14498	0.0228054	0.25653	0.0221463	0.0418461	0.023642	0.0535864	0.0228054	0.25653
CLEC1B	4332-6	SL013488	CLC1B	C-type lectin domain family 1 member B	Q9P126	0.0260392	0.174992	0.0302484	0.0723661	0.0243396	0.0387882	0.0260392	0.174992
TKT	4306-4	SL003655	Transketolase	Transketolase	P29401	0.0176858	0.0267113	0.0173731	0.0447033	0.0164103	0.0386741	0.0176858	0.0267113
CSF1	3738-54	SL002684	CSF-1	Macrophage colony-stimulating factor 1	P09603	0.0137026	0.0262615	0.0226835	0.0325136	0.0154664	0.0309844	0.0137026	0.0262615
CDC37	3879-50	SL011232	CDC37	Hsp90 co-chaperone Cdc37	Q16543	0.0287131	0.0497254	0.0479616	0.0706622	0.0353162	0.0675609	0.0287131	0.0497254
XRCC6	2835-1	SL004301	Ku70	X-ray repair cross-complementing protein 6	P12956	0.0288307	0.0948898	0.0200635	0.0294318	0.0205826	0.0372746	0.0288307	0.0948898
IFNGR2	9180-6	SL007217	INGR2	Interferon gamma receptor 2	P38484	0.0146863	0.111692	0.01748	0.0260098	0.0190819	0.0270293	0.0146863	0.111692
PLA2G2A	2692-74	SL002528	NPS-PLA2	Phospholipase A2, membrane associated	P14555	0.0448201	0.177466	0.0337379	0.063726	0.0332646	0.0604322	0.0448201	0.177466
SOST	13101-60	SL007631	SOST	Sclerostin	Q9BQB4	0.0463665	0.340828	0.0232177	0.0368633	0.0231821	0.0441199	0.0463665	0.340828
OLR1	3636-37	SL007327	OLR1	Oxidized low-density lipoprotein receptor 1	P78380	0.0273392	0.0648677	0.018034	0.0355518	0.0324746	0.0445112	0.0273392	0.0648677
CA2	4970-55	SL000339	carbonic anhydrase II	Carbonic anhydrase 2	P00918	0.0158494	0.530686	0.0143652	0.0317138	0.018224	0.0455497	0.0158494	0.530686
GDF5	2752-62	SL004329	BMP-14	Growth/differentiation factor 5	P43026	0.0958725	0.182108	0.0736419	0.107949	0.0879046	0.11751	0.0958725	0.182108
ARPP19	4963-19	SL011708	ARP19	cAMP-regulated phosphoprotein 19	P56211	0.0209948	0.0309529	0.0174845	0.0337404	0.0274082	0.0570785	0.0209948	0.0309529
CDH6	3591-51	SL004865	Cadherin-6	Cadherin-6	P55285	0.0461796	0.052045	0.0264823	0.0506841	0.0274127	0.0705718	0.0461796	0.052045
HAMP	3504-58	SL004536	LEAP-1	Hepcidin	P81172	0.0251526	0.0441933	0.0132361	0.0291878	0.0218378	0.0392482	0.0251526	0.0441933
PTPN2	3401-8	SL005261	TCPTP	Tyrosine-protein phosphatase non-receptor type 2	P17706	0.0275803	0.093795	0.0176801	0.0402504	0.020832	0.0324767	0.0275803	0.093795
ANXA5	14158-17	SL003848	Annexin V	Annexin A5	P08758	0.0277477	0.166697	0.0149447	0.0481529	0.0136314	0.038996	0.0277477	0.166697
EIF4G2	4230-1	SL011211	IF4G2	Eukaryotic translation initiation factor 4 gamma 2	P78344	0.038551	0.252783	0.0477217	0.0615928	0.0291338	0.0461401	0.038551	0.252783
LCORL	4304-18	SL006698	transcription factor MLR1, isoform CRA_b	Ligand-dependent nuclear receptor corepressor-like protein	Q8N3X6	0.0247243	0.256701	0.0214326	0.0406769	0.0216332	0.0472386	0.0247243	0.256701
IBSP	3415-61	SL004660	BSP	Bone sialoprotein 2	P21815	0.0292426	0.121524	0.0214115	0.0432421	0.0240866	0.0445639	0.0292426	0.121524
ECM1	3366-51	SL006550	ECM1	Extracellular matrix protein 1	Q16610	0.0316001	0.0524633	0.0219995	0.0737076	0.0188198	0.0420415	0.0316001	0.0524633
CFL1	4203-50	SL004920	Cofilin-1	Cofilin-1	P23528	0.0587892	0.12203	0.0925567	0.0843024	0.113729	0.0685826	0.0587892	0.12203
MAPK14	5007-1	SL006920	MAPK14	Mitogen-activated protein kinase 14	Q16539	0.0191165	0.0430985	0.0241241	0.0284798	0.0228655	0.0359661	0.0191165	0.0430985
C6	4127-75	SL000322	C6	Complement component C6	P13671	0.121296	0.18507	0.0870077	0.13499	0.0700744	0.0821031	0.121296	0.18507
RSPO3	13094-75	SL018509	RSPO3	R-spondin-3	Q9BXY4	0.0133296	0.155691	0.00951142	0.0303189	0.0156925	0.0242766	0.0133296	0.155691
C1R	3285-23	SL000310	C1r	Complement C1r subcomponent	P00736	0.0257079	0.15664	0.0259788	0.108063	0.0182358	0.0616094	0.0257079	0.15664
ROR1	8474-6	SL006114	ROR1	Tyrosine-protein kinase transmembrane receptor ROR1	Q01973	0.0354879	0.0396936	0.0305723	0.0568953	0.0282769	0.0342602	0.0354879	0.0396936
MBL2	3000-66	SL004516	MBL	Mannose-binding protein C	P11226	0.0359298	0.109157	0.0258351	0.0341557	0.0336837	0.0312518	0.0359298	0.109157
MSR1	3684-78	SL004580	Macrophage scavenger receptor	Macrophage scavenger receptor types I and II	P21757	0.0211075	0.471382	0.0197487	0.0359398	0.0256176	0.0624674	0.0211075	0.471382
CDON	4541-49	SL014092	CDON	Cell adhesion molecule-related/down-regulated by oncogenes	Q4KMG0	0.0174528	0.0395098	0.0309264	0.0388136	0.0445449	0.0390252	0.0174528	0.0395098
VTA1	4209-60	SL004757	DRG-1	Vacuolar protein sorting-associated protein VTA1 homolog	Q9NP79	0.0386577	0.0459136	0.0277249	0.0449061	0.0256422	0.0382093	0.0386577	0.0459136
HPGD	4995-16	SL003930	HPG-	15-hydroxyprostaglandin dehydrogenase [NAD(+)]	P15428	0.0284507	0.0598813	0.0341882	0.03199	0.0370405	0.0382282	0.0284507	0.0598813
C2	3186-2	SL002525	C2	Complement C2	P06681	0.0792377	0.0459233	0.0201856	0.0943857	0.0662525	0.115671	0.0792377	0.0459233
F2	5316-54	SL000558	Prothrombin	Prothrombin	P00734	0.104637	0.0911598	0.0581732	0.117504	0.06742	0.0812835	0.104637	0.0911598
IFNA7	14129-1	SL019978	IFNA7	Interferon alpha-7	P01567	0.0313259	0.520624	0.0330861	0.0298089	0.0290127	0.0385187	0.0313259	0.520624
RAC3	5271-5	SL007310	RAC3	Ras-related C3 botulinum toxin substrate 3	P60763	0.0182808	0.143984	0.0346442	0.0536994	0.0228974	0.0559273	0.0182808	0.143984
CDC42BPB	3629-60	SL006805	MRCKB	Serine/threonine-protein kinase MRCK beta	Q9Y5S2	0.0314492	0.0542164	0.0163907	0.0435087	0.0237581	0.0775839	0.0314492	0.0542164
CKM	2670-67	SL000383	CK-MM	Creatine kinase M-type	P06732	0.029542	0.104316	0.0305516	0.0369413	0.0236036	0.0282945	0.029542	0.104316
F11	2190-55	SL002662	Coagulation Factor XI	Coagulation Factor XI	P03951	0.0282265	0.087075	0.017928	0.105512	0.0261467	0.0471182	0.0282265	0.087075
TPI1	4309-59	SL004812	Triosephosphate isomerase	Triosephosphate isomerase	P60174	0.0197281	0.0388887	0.0324227	0.0446132	0.0315819	0.0384277	0.0197281	0.0388887
LGALS7	9196-8	SL005166	Galectin-7	Galectin-7	P47929	0.0289569	0.103239	0.0169281	0.0436272	0.0347838	0.0371831	0.0289569	0.103239
ACVRL1	2969-11	SL004851	ALK-1	Serine/threonine-protein kinase receptor R3	P37023	0.0163729	0.0255885	0.0203927	0.03253	0.0132443	0.0234272	0.0163729	0.0255885
KNG1	4495-33	SL017189	Kininogen, HMW	Kininogen-1	P01042	0.151004	0.244737	0.0589219	0.061627	0.121051	0.150309	0.151004	0.244737
IGFBP7	3320-49	SL005087	IGFBP-7	Insulin-like growth factor-binding protein 7	Q16270	0.0374749	0.155386	0.033426	0.053001	0.0340061	0.0356307	0.0374749	0.155386
CKAP2	5345-51	SL006675	CKAP2	Cytoskeleton-associated protein 2	Q8WWK9	0.0423265	0.0523183	0.0375163	0.0619303	0.0430775	0.0598604	0.0423265	0.0523183
GZMB	4133-54	SL004068	Granzyme B	Granzyme B	P10144	0.0308097	0.310261	0.0319659	0.0469419	0.0202107	0.0270096	0.0308097	0.310261
IFNL2	4397-26	SL004349	IFN-lambda 2	Interferon lambda-2	Q8IZJ0	0.0262124	0.260593	0.025154	0.0405856	0.0216079	0.0370558	0.0262124	0.260593
IFNAR1	9183-7	SL004475	IFN-a/b R1	Interferon alpha/beta receptor 1	P17181	0.0267825	0.0843728	0.0194817	0.0852409	0.0350198	0.129245	0.0267825	0.0843728
CAST	3026-5	SL000338	Calpastatin	Calpastatin	P20810	0.0350067	0.0582752	0.0166326	0.0336619	0.0435337	0.0416887	0.0350067	0.0582752
DUSP3	3480-7	SL008122	DUS3	Dual specificity protein phosphatase 3	P51452	0.0125267	0.111399	0.02018	0.0540509	0.0204805	0.0423688	0.0125267	0.111399
TNFSF11	2917-3	SL002541	sRANKL	Tumor necrosis factor ligand superfamily member 11	O14788	0.021725	0.0907097	0.0207994	0.0368093	0.0256888	0.0388061	0.021725	0.0907097
CAPN1 CAPNS1	2668-70	SL000337	Calpain I	Calpain I	P07384 P04632	0.0367755	0.0572669	0.0217166	0.0552063	0.0337866	0.0426284	0.0367755	0.0572669
AHSG	3581-53	SL000251	a2-HS-Glycoprotein	Alpha-2-HS-glycoprotein	P02765	0.0710641	0.116259	0.0329333	0.0646355	0.0756782	0.103806	0.0710641	0.116259
NPPB	3723-1	SL000306	BNP-32	Brain natriuretic peptide 32	P16860	0.02672	0.241387	0.0211482	0.0540138	0.0293779	0.0524698	0.02672	0.241387
ERAP1	4964-67	SL007729	ARTS1	Endoplasmic reticulum aminopeptidase 1	Q9NZ08	0.0551104	0.091683	0.0522732	0.0828074	0.069568	0.0831863	0.0551104	0.091683
IL17A	9170-24	SL001713	IL-17	Interleukin-17A	Q16552	0.0160603	0.181558	0.0277691	0.0487126	0.0204219	0.0311565	0.0160603	0.181558
CNTN2	3296-92	SL008623	CNTN2	Contactin-2	Q02246	0.0309958	0.0502897	0.0329306	0.0393838	0.0310575	0.0349293	0.0309958	0.0502897
SIGLEC6	2741-22	SL005217	Siglec-6	Sialic acid-binding Ig-like lectin 6	O43699	0.0270563	0.0771613	0.024696	0.0457862	0.0302623	0.0493905	0.0270563	0.0771613
TGFBI	3283-21	SL006544	BGH3	Transforming growth factor-beta-induced protein ig-h3	Q15582	0.0523908	0.094207	0.0486495	0.0579465	0.0524365	0.0483055	0.0523908	0.094207
EIF4H	5885-55	SL004924	eIF-4H	Eukaryotic translation initiation factor 4H	Q15056	0.0616366	0.194368	0.032647	0.0782159	0.0587031	0.0973027	0.0616366	0.194368
ACAN	3280-49	SL004661	Aggrecan	Aggrecan core protein	P16112	0.0235715	0.0547082	0.0197752	0.032177	0.0382779	0.0335606	0.0235715	0.0547082
CLIC1	5013-2	SL004915	NCC27	Chloride intracellular channel protein 1	O00299	0.0325873	0.143128	0.0482261	0.0561712	0.0444387	0.0490477	0.0325873	0.143128
RPS3A	5484-63	SL011588	RS3A	40S ribosomal protein S3a	P61247	0.0205751	0.736634	0.021895	0.06765	0.0123043	0.0664958	0.0205751	0.736634
PLA2G2E	2447-7	SL004066	GIIE	Group IIE secretory phospholipase A2	Q9NZK7	0.0223656	0.0471669	0.018595	0.0295258	0.0158919	0.028616	0.0223656	0.0471669
ADGRE2	4546-27	SL008822	EMR2	Adhesion G protein-coupled receptor E2	Q9UHX3	0.0560875	0.0539197	0.0246301	0.057967	0.034856	0.0555358	0.0560875	0.0539197
CXCL10	4141-79	SL003183	IP-10	C-X-C motif chemokine 10	P02778	0.0252831	0.299845	0.0367797	0.0468225	0.0371122	0.0482655	0.0252831	0.299845
HSPB1	11103-24	SL000448	HSP 27	Heat shock protein beta-1	P04792	0.0253342	0.0364355	0.0205714	0.0438084	0.0246378	0.031148	0.0253342	0.0364355
PEX5	5915-58	SL012148	PEX5	Peroxisomal targeting signal 1 receptor	P50542	0.00973896	0.491275	0.0224608	0.0550742	0.025521	0.0791867	0.00973896	0.491275
IGF2R	3676-15	SL003679	IGF-II receptor	Cation-independent mannose-6-phosphate receptor	P11717	0.0421177	0.0317181	0.0258318	0.0480227	0.0299344	0.0292289	0.0421177	0.0317181
SORCS2	4569-52	SL014091	SORC2	VPS10 domain-containing receptor SorCS2	Q96PQ0	0.0199859	0.162952	0.0283262	0.0259151	0.0225683	0.0400259	0.0199859	0.162952
CGA TSHB	3521-16	SL000589	TSH	Thyroid Stimulating Hormone	P01215 P01222	0.025085	0.181214	0.0380235	0.0442988	0.0356456	0.0415625	0.025085	0.181214
TNFRSF1A	2654-19	SL001992	TNF sR-I	Tumor necrosis factor receptor superfamily member 1A	P19438	0.0255958	0.0739365	0.017782	0.0346509	0.0320806	0.0180169	0.0255958	0.0739365
ALDOA	5864-10	SL004910	aldolase A	Fructose-bisphosphate aldolase A	P04075	0.04244	0.0408122	0.0490762	0.0621491	0.0505317	0.0370642	0.04244	0.0408122
MAP2K2	3628-3	SL010501	MP2K2	Dual specificity mitogen-activated protein kinase kinase 2	P36507	0.0229533	0.173137	0.0139085	0.0282832	0.0258293	0.0309311	0.0229533	0.173137
CTSS	3181-50	SL004673	Cathepsin S	Cathepsin S	P25774	0.0152591	0.0879219	0.0168876	0.0350313	0.0189932	0.0294664	0.0152591	0.0879219
THBS2	3339-33	SL007206	TSP2	Thrombospondin-2	P35442	0.0232989	0.0514971	0.0185283	0.0327101	0.0201773	0.028972	0.0232989	0.0514971
IL1RAPL2	5082-51	SL004849	IL-1 sR9	X-linked interleukin-1 receptor accessory protein-like 2	Q9NP60	0.0193755	0.247753	0.0227575	0.0317115	0.0235897	0.0333587	0.0193755	0.247753
ADAM9	3795-6	SL004642	ADAM 9	Disintegrin and metalloproteinase domain-containing protein 9	Q13443	0.0436587	0.697848	0.0335004	0.0705295	0.0465798	0.0644862	0.0436587	0.697848
MDK	2911-27	SL002621	Midkine	Midkine	P21741	0.0301128	0.235493	0.0277726	0.0460238	0.0245996	0.0464977	0.0301128	0.235493
ROBO2	5116-62	SL007680	ROBO2	Roundabout homolog 2	Q9HCK4	0.0257895	0.0268229	0.026231	0.0441398	0.0305469	0.0388284	0.0257895	0.0268229
SHH	2743-5	SL005220	Sonic Hedgehog	Sonic hedgehog protein	Q15465	0.0150052	0.173478	0.0228512	0.0367855	0.0199779	0.0334828	0.0150052	0.173478
LILRB1	5090-49	SL005190	ILT-2	Leukocyte immunoglobulin-like receptor subfamily B member 1	Q8NHL6	0.0167521	0.0345408	0.0149313	0.040639	0.0206336	0.0262193	0.0167521	0.0345408
IL3RA	4490-65	SL005187	IL-3 Ra	Interleukin-3 receptor subunit alpha	P26951	0.0197415	0.0579038	0.0303921	0.0623829	0.0313547	0.0410317	0.0197415	0.0579038
S100A6	13090-17	SL004827	S100A6	Protein S100-A6	P06703	0.0377178	0.0283484	0.0167198	0.0337897	0.0264787	0.0380609	0.0377178	0.0283484
ERBB4	2618-10	SL003803	ERBB4	Receptor tyrosine-protein kinase erbB-4	Q15303	0.0393767	0.0513514	0.0202845	0.037163	0.0237991	0.0439828	0.0393767	0.0513514
SERPINA10	13119-26	SL004467	protein Z inhibitor	Protein Z-dependent protease inhibitor	Q9UK55	0.0292214	0.0559218	0.0167977	0.0281125	0.0240595	0.0342832	0.0292214	0.0559218
HIST3H2A	14144-3	SL019979	H2A3	Histone H2A type 3	Q7L7L0	0.0463333	0.0642258	0.0503186	0.294909	0.0453752	0.0831948	0.0463333	0.0642258
CCL1	2770-51	SL003176	I-309	C-C motif chemokine 1	P22362	0.034032	0.0655282	0.020776	0.0492964	0.022216	0.0417143	0.034032	0.0655282
PTH	5954-62	SL003970	PTH	Parathyroid hormone	P01270	0.0407823	0.211453	0.0461551	0.0542347	0.0252031	0.0539971	0.0407823	0.211453
KPNA2	2860-19	SL004718	Karyopherin-a2	Importin subunit alpha-1	P52292	0.0275957	0.0334592	0.0179186	0.0308402	0.0160939	0.037841	0.0275957	0.0334592
TLR4	11101-18	SL004489	TLR4	Toll-like receptor 4	O00206	0.0347404	0.444251	0.0134257	0.056178	0.0332052	0.0358506	0.0347404	0.444251
EPHA3	3432-21	SL010498	EPHA3	Ephrin type-A receptor 3	P29320	0.0540541	0.316916	0.0130287	0.02891	0.0280643	0.0462174	0.0540541	0.316916
CXCL16	2436-49	SL004016	CXCL16, soluble	C-X-C motif chemokine 16	Q9H2A7	0.0188086	0.0938555	0.0171537	0.0234413	0.016131	0.024025	0.0188086	0.0938555
DHH	4389-2	SL007003	DHH	Desert hedgehog protein N-product	O43323	0.0179554	0.0568596	0.0191713	0.0519594	0.0145859	0.0559262	0.0179554	0.0568596
SLAMF7	5487-7	SL016928	SLAF7	SLAM family member 7	Q9NQ25	0.0753725	0.0596095	0.0456573	0.0825563	0.0466343	0.0582046	0.0753725	0.0596095
PSPN	2696-87	SL004685	Persephin	Persephin	O60542	0.0281996	0.167248	0.0205658	0.0415663	0.0238375	0.0488466	0.0281996	0.167248
PDE9A	5201-50	SL016554	PDE9A	High affinity cGMP-specific 3',5'-cyclic phosphodiesterase 9A	O76083	0.0197174	0.055517	0.0146663	0.0398343	0.0283434	0.0297101	0.0197174	0.055517
TNFRSF10A	4832-75	SL004156	TRAIL R1	Tumor necrosis factor receptor superfamily member 10A	O00220	0.0325348	0.0464729	0.0221153	0.0588408	0.0153653	0.0838415	0.0325348	0.0464729
CSNK2A2 CSNK2B	5226-36	SL016551	CK2-A2:B	Casein kinase II 2-alpha':2-beta heterotetramer	P19784 P67870	0.036424	0.118387	0.0289372	0.0659489	0.0231261	0.0437168	0.036424	0.118387
SERPINA6	4785-30	SL000347	CBG	Corticosteroid-binding globulin	P08185	0.0153632	0.217041	0.0113485	0.0415623	0.014454	0.0528313	0.0153632	0.217041
APOE	2938-55	SL004669	Apo E4	Apolipoprotein E (isoform E4)	P02649	0.0956482	0.111538	0.0847133	0.130448	0.0656748	0.0872549	0.0956482	0.111538
PRSS2	5034-79	SL010388	Trypsin 2	Trypsin-2	P07478	0.0220071	0.0529488	0.014069	0.034048	0.0509396	0.0653644	0.0220071	0.0529488
FAM107B	4774-62	SL016129	FAM107B	Protein FAM107B	Q9H098	0.0181609	0.0671809	0.0248956	0.0312228	0.015423	0.0424395	0.0181609	0.0671809
PLXNB2	9216-100	SL009948	PLXB2	Plexin-B2	O15031	0.017699	0.027611	0.0222199	0.0452709	0.0226619	0.0256045	0.017699	0.027611
EIF4A3	4997-19	SL011616	IF4A3	Eukaryotic initiation factor 4A-III	P38919	0.0187246	0.72295	0.00962906	0.0742971	0.0152162	0.0596115	0.0187246	0.72295
F5	4906-35	SL000622	Coagulation Factor V	Coagulation Factor V	P12259	0.06189	0.0748681	0.0604362	0.11884	0.0505309	0.0886551	0.06189	0.0748681
DKK4	3365-7	SL010612	Dkk-4	Dickkopf-related protein 4	Q9UBT3	0.0368728	0.173012	0.0161568	0.0305221	0.0441448	0.0517637	0.0368728	0.173012
OPCML	3634-5	SL005491	OBCAM	Opioid-binding protein/cell adhesion molecule	Q14982	0.0408877	0.0405291	0.0192679	0.0375507	0.0274857	0.0741482	0.0408877	0.0405291
ENO2	10339-48	SL001731	NSE	Gamma-enolase	P09104	0.0425091	0.124104	0.0462848	0.0433744	0.0468334	0.043265	0.0425091	0.124104
CA13	3420-21	SL004869	Carbonic anhydrase XIII	Carbonic anhydrase 13	Q8N1Q1	0.0222514	0.21518	0.0289888	0.0808118	0.0585094	0.0610897	0.0222514	0.21518
C8A C8B C8G	2429-27	SL000324	C8	Complement component C8	P07357,P07358,P07360	0.0308994	0.0926251	0.0265719	0.0726634	0.0379599	0.0497391	0.0308994	0.0926251
AKT1 AKT2 AKT3	3392-68	SL017614	PKB a/b/g	RAC-alpha/beta/gamma serine/threonine-protein kinase	P31749 P31751 Q9Y243	0.0352475	0.186283	0.041807	0.0506749	0.0526375	0.0471008	0.0352475	0.186283
MAPKAPK3	3822-54	SL004765	MAPKAPK3	MAP kinase-activated protein kinase 3	Q16644	0.023005	0.0649056	0.0244455	0.050099	0.0144231	0.0369557	0.023005	0.0649056
CTLA4	3022-4	SL000384	CTLA-4	Cytotoxic T-lymphocyte protein 4	P16410	0.0328407	0.194643	0.02585	0.0586427	0.0420842	0.0744118	0.0328407	0.194643
GREM1	4449-67	SL007024	GREM1	Gremlin-1	O60565	0.0248186	0.0825425	0.0298325	0.0399329	0.0149781	0.0393178	0.0248186	0.0825425
GOT1	4912-17	SL000280	GOT1	Aspartate aminotransferase, cytoplasmic	P17174	0.0583493	0.160772	0.0443766	0.0721939	0.0567785	0.048883	0.0583493	0.160772
IL25	4137-57	SL004351	IL-17E	Interleukin-25	Q9H293	0.0220901	0.154629	0.0294607	0.0274887	0.0223927	0.0299567	0.0220901	0.154629
GPI	4272-46	SL000539	PHI	Glucose-6-phosphate isomerase	P06744	0.022489	0.0789837	0.0169632	0.0405361	0.031643	0.0285573	0.022489	0.0789837
CD22	2891-1	SL004330	CD22	B-cell receptor CD22	P20273	0.0265319	0.0367247	0.0189415	0.0336722	0.029209	0.0415738	0.0265319	0.0367247
TFF3	4721-54	SL006119	TFF3	Trefoil factor 3	Q07654	0.0277933	0.778916	0.0168805	0.0314953	0.0416942	0.0338723	0.0277933	0.778916
UNC5D	5140-56	SL005231	UNC5H4	Netrin receptor UNC5D	Q6UXZ4	0.0249064	0.0361225	0.043039	0.046392	0.026931	0.0275452	0.0249064	0.0361225
MAPK1	3115-64	SL006918	MK01	Mitogen-activated protein kinase 1	P28482	0.0254701	0.0841371	0.0159144	0.0393452	0.0203136	0.0351631	0.0254701	0.0841371
CD47	6653-58	SL004838	CD47	Leukocyte surface antigen CD47	Q08722	0.0335134	0.0841183	0.0231297	0.059613	0.0203531	0.0524863	0.0335134	0.0841183
RAN	4282-3	SL005034	RAN	GTP-binding nuclear protein Ran	P62826	0.0634839	0.32059	0.0396847	0.0854659	0.0503593	0.0613933	0.0634839	0.32059
YWHAQ	7625-27	SL008071	14-3-3 protein theta	14-3-3 protein theta	P27348	0.027081	0.0398549	0.022581	0.0329491	0.021059	0.0554894	0.027081	0.0398549
MDM2	4245-80	SL001999	MDM2	E3 ubiquitin-protein ligase Mdm2	Q00987	0.0339845	0.0590965	0.025226	0.0403484	0.0290415	0.0370508	0.0339845	0.0590965
HNRNPAB	4450-26	SL009791	hnRNP A/B	Heterogeneous nuclear ribonucleoprotein A/B	Q99729	0.0203534	0.0332619	0.0158557	0.0315787	0.0184914	0.0390416	0.0203534	0.0332619
CTSD	5508-62	SL000344	Cathepsin D	Cathepsin D	P07339	0.0820804	0.174956	0.141119	0.506775	0.153811	0.0703247	0.0820804	0.174956
HNRNPA2B1	5351-52	SL004891	hnRNP A2/B1	Heterogeneous nuclear ribonucleoproteins A2/B1	P22626	0.0172367	0.0370673	0.0129705	0.0207323	0.0189747	0.0282041	0.0172367	0.0370673
APOL1	11510-31	SL005699	Apo L1	Apolipoprotein L1	O14791	0.0636708	0.179332	0.0305335	0.100853	0.0351294	0.0557641	0.0636708	0.179332
MASP1	3605-77	SL011049	MASP3	Mannan-binding lectin serine protease 1	P48740	0.0235461	0.0561874	0.0211916	0.0469343	0.0290369	0.0333594	0.0235461	0.0561874
MAPK9	5244-12	SL004716	JNK2	Mitogen-activated protein kinase 9	P45984	0.0503792	0.526599	0.0412236	0.137438	0.0259687	0.0832022	0.0503792	0.526599
BOC	4328-2	SL013490	BOC	Brother of CDO	Q9BWV1	0.0228716	0.208368	0.0203792	0.033634	0.0213597	0.0325651	0.0228716	0.208368
RBP4	5482-61	SL000566	RBP	Retinol-binding protein 4	P02753	0.0606591	0.102903	0.0376997	0.0666593	0.044091	0.044435	0.0606591	0.102903
FTH1 FTL	5934-1	SL000420	Ferritin	Ferritin	P02794 P02792	0.0242185	0.421179	0.0235439	0.0427398	0.0296688	0.0489582	0.0242185	0.421179
FAM3D	13102-1	SL012769	FAM3D	Protein FAM3D	Q96BQ1	0.0263615	0.030153	0.0198914	0.032822	0.0261371	0.0315581	0.0263615	0.030153
GZMA	3440-7	SL004298	granzyme A	Granzyme A	P12544	0.0215084	0.203719	0.0162012	0.0363234	0.0193244	0.0267333	0.0215084	0.203719
TPT1	3872-2	SL005679	TCTP	Translationally-controlled tumor protein	P13693	0.0232148	0.104774	0.0243265	0.0403827	0.0278123	0.0367241	0.0232148	0.104774
UBE2I	2877-3	SL004306	UBC9	SUMO-conjugating enzyme UBC9	P63279	0.0290508	0.0532427	0.0160281	0.0318729	0.0213671	0.0348276	0.0290508	0.0532427
PDGFRA	10366-11	SL001728	PDGFRA	Platelet-derived growth factor receptor alpha	P16234	0.0240221	0.0731041	0.0205185	0.0243515	0.0332713	0.0430339	0.0240221	0.0731041
RAC1	2870-29	SL004009	RAC1	Ras-related C3 botulinum toxin substrate 1	P63000	0.0459925	0.0831801	0.0199286	0.0699255	0.0369484	0.0367944	0.0459925	0.0831801
IL2	3070-1	SL000478	IL-2	Interleukin-2	P60568	0.0313165	0.230193	0.0300083	0.039407	0.0546821	0.0710269	0.0313165	0.230193
PA2G4	4258-15	SL008331	PA2G4	Proliferation-associated protein 2G4	Q9UQ80	0.0353599	0.0690654	0.0262647	0.0308611	0.0525717	0.0406389	0.0353599	0.0690654
MAP3K7 TAB1	5259-2	SL016567	TAK1-TAB1	Mitogen-activated protein kinase kinase kinase 7:TGF-beta-activated kinase 1 and MAP3K7-binding protein 1 fusion	O43318 Q15750	0.0283303	0.0395996	0.0226207	0.0513148	0.0258053	0.113271	0.0283303	0.0395996
TPO	3873-51	SL000588	TMA	Thyroid peroxidase	P07202	0.021192	0.0802829	0.0258596	0.0437787	0.0206127	0.0404623	0.021192	0.0802829
BTK	3416-2	SL010521	BTK	Tyrosine-protein kinase BTK	Q06187	0.0253371	0.175382	0.0341315	0.0703235	0.0257431	0.045188	0.0253371	0.175382
BCAR3	5262-57	SL014470	BCAR3	Breast cancer anti-estrogen resistance protein 3	O75815	0.027072	0.0424189	0.0108992	0.0313186	0.0187108	0.0528493	0.027072	0.0424189
FOLH1	5478-50	SL000158	PSMA	Glutamate carboxypeptidase 2	Q04609	0.0298427	0.346055	0.0300229	0.0416192	0.0267482	0.0354178	0.0298427	0.346055
CD200R1	5103-30	SL014288	MO2R1	Cell surface glycoprotein CD200 receptor 1	Q8TD46	0.0275172	0.0371899	0.0274593	0.0518605	0.0333223	0.037504	0.0275172	0.0371899
SSRP1	5032-64	SL009868	SSRP1	FACT complex subunit SSRP1	Q08945	0.0155525	0.0483553	0.0177112	0.0233638	0.0258105	0.0277843	0.0155525	0.0483553
IL7	4140-3	SL000483	IL-7	Interleukin-7	P13232	0.0496071	0.176646	0.0215809	0.0402975	0.0262235	0.0662139	0.0496071	0.176646
GDNF	5822-22	SL004248	GDNF	Glial cell line-derived neurotrophic factor	P39905	0.031928	0.0658643	0.0279623	0.0421922	0.0285991	0.037062	0.031928	0.0658643
DKK1	3535-84	SL004367	DKK1	Dickkopf-related protein 1	O94907	0.0265651	0.30143	0.0244263	0.0445489	0.0291705	0.0328486	0.0265651	0.30143
AKT2	5360-9	SL003722	PKB beta	RAC-beta serine/threonine-protein kinase	P31751	0.0423213	0.684093	0.0304549	0.0459196	0.0360005	0.0399841	0.0423213	0.684093
HMGN1	9187-2	SL013165	HMGN1	Non-histone chromosomal protein HMG-14	P05114	0.0445808	0.0650933	0.0411753	0.0528439	0.0496989	0.0464019	0.0445808	0.0650933
CD5L	3293-2	SL006108	CD5L	CD5 antigen-like	O43866	0.0567279	0.0962374	0.0353941	0.0770336	0.0302122	0.0513028	0.0567279	0.0962374
KIR3DL2	5096-51	SL014269	KI3L2	Killer cell immunoglobulin-like receptor 3DL2	P43630	0.0230768	0.0392402	0.0239721	0.0868918	0.0150758	0.0855767	0.0230768	0.0392402
DYNLRB1	3845-51	SL011530	DLRB1	Dynein light chain roadblock-type 1	Q9NP97	0.0251386	0.180165	0.0967115	0.101995	0.0886765	0.0716856	0.0251386	0.180165
CCNB1	5347-59	SL000130	Cyclin B1	G2/mitotic-specific cyclin-B1	P14635	0.0241045	0.0548189	0.0366198	0.0534397	0.0378288	0.0919676	0.0241045	0.0548189
HSP90AA1 HSP90AB1	2625-53	SL017612	HSP 90a/b	Heat shock protein HSP 90-alpha/beta	P07900 P08238	0.0178702	0.0713034	0.024024	0.0482111	0.0185593	0.0322637	0.0178702	0.0713034
PLG	3710-49	SL000268	Angiostatin	Angiostatin	P00747	0.0402938	0.0685579	0.0262552	0.0319076	0.0964005	0.0709804	0.0402938	0.0685579
CRELD1	7628-40	SL012774	CREL1	Cysteine-rich with EGF-like domain protein 1	Q96HD1	0.017572	0.0674312	0.0172842	0.0340972	0.0235387	0.0383514	0.017572	0.0674312
CAMKK1	3877-67	SL004938	CaMKK alpha	Calcium/calmodulin-dependent protein kinase kinase 1	Q8N5S9	0.0362185	0.0607368	0.0268978	0.0436793	0.0290531	0.0641638	0.0362185	0.0607368
SPINT2	2843-13	SL001897	SPINT2	Kunitz-type protease inhibitor 2	O43291	0.0202213	0.0421898	0.0236435	0.0275341	0.0303313	0.0300356	0.0202213	0.0421898
BCL2L1	4423-77	SL003674	BCL2-like 1 protein	Bcl-2-like protein 1	Q07817	0.0201484	0.0498496	0.0270612	0.0354527	0.042425	0.0334483	0.0201484	0.0498496
HFE2	3332-57	SL010469	RGM-C	Hemojuvelin	Q6ZVN8	0.018526	0.133336	0.0184627	0.0331479	0.016435	0.0273673	0.018526	0.133336
LY86	3623-84	SL007059	LY86	Lymphocyte antigen 86	O95711	0.031434	0.0315619	0.0240842	0.0283841	0.0319198	0.0466759	0.031434	0.0315619
TACSTD2	2619-72	SL001890	GA733-1 protein	Tumor-associated calcium signal transducer 2	P09758	0.0167289	0.124325	0.0184964	0.04923	0.0162463	0.0536578	0.0167289	0.124325
FGF16	4393-3	SL004334	FGF-16	Fibroblast growth factor 16	O43320	0.0233633	0.0492389	0.0142218	0.0651059	0.027469	0.0316789	0.0233633	0.0492389
SEMA3E	5363-51	SL010470	Semaphorin 3E	Semaphorin-3E	O15041	0.0173694	0.108889	0.0151163	0.0296316	0.018524	0.0318645	0.0173694	0.108889
NR3C1	2857-70	SL006914	Glucocorticoid receptor	Glucocorticoid receptor	P04150	0.0423428	0.430363	0.0272427	0.0776009	0.0388676	0.0898246	0.0423428	0.430363
ENO1	11105-171	SL003650	Alpha enolase	Alpha-enolase	P06733	0.0329774	0.126215	0.0670077	0.127588	0.056069	0.0603553	0.0329774	0.126215
JAM3	2998-53	SL005194	JAM-C	Junctional adhesion molecule C	Q9BX67	0.0220789	0.0416658	0.013215	0.0448752	0.0218918	0.0506073	0.0220789	0.0416658
TEK	3773-15	SL003200	sTie-2	Angiopoietin-1 receptor, soluble	Q02763	0.0246666	0.0967621	0.0176154	0.0324332	0.0235824	0.031387	0.0246666	0.0967621
STIP1	5489-18	SL010250	Stress-induced-phosphoprotein 1	Stress-induced-phosphoprotein 1	P31948	0.0518384	0.06047	0.0513	0.0830251	0.0564524	0.0534907	0.0518384	0.06047
ASGR1	5452-71	SL008835	ASGR1	Asialoglycoprotein receptor 1	P07306	0.0345821	0.138065	0.0280769	0.045502	0.0394291	0.0530638	0.0345821	0.138065
FCAR	4987-17	SL010373	FCAR	Immunoglobulin alpha Fc receptor	P24071	0.0476254	0.157427	0.0233855	0.0420803	0.0221135	0.0276677	0.0476254	0.157427
KLK3	8468-19	SL000062	PSA	Prostate-specific antigen	P07288	0.0297326	0.748438	0.023043	0.0598659	0.0211132	0.0420744	0.0297326	0.748438
MSTN	14583-49	SL004357	Myostatin	Growth/differentiation factor 8	O14793	0.0198493	0.15956	0.0194786	0.0331065	0.0212186	0.0277331	0.0198493	0.15956
TNFRSF11A	5424-55	SL003690	RANK	Tumor necrosis factor receptor superfamily member 11A	Q9Y6Q6	0.0199881	0.0346802	0.0100832	0.0285694	0.0147363	0.0249777	0.0199881	0.0346802
UBE2N	3905-62	SL008143	UBE2N	Ubiquitin-conjugating enzyme E2 N	P61088	0.0323594	0.0438061	0.03087	0.041489	0.0364065	0.0301527	0.0323594	0.0438061
WIF1	2848-2	SL004652	WIF-1	Wnt inhibitory factor 1	Q9Y5W5	0.0185378	0.0282224	0.0163502	0.0261186	0.0136752	0.0326093	0.0185378	0.0282224
CNTF	3489-9	SL004331	CNTF	Ciliary neurotrophic factor	P26441	0.0278726	0.0347864	0.0229255	0.0340824	0.0243743	0.0340106	0.0278726	0.0347864
CXCL8	3447-64	SL000039	IL-8	Interleukin-8	P10145	0.0183278	0.0354035	0.0192246	0.0244122	0.0205332	0.0283943	0.0183278	0.0354035
AREG	2970-60	SL000136	AREG	Amphiregulin	P15514	0.0236835	0.0327824	0.0311773	0.0541936	0.0340172	0.0635306	0.0236835	0.0327824
COL23A1	4543-65	SL014048	CONA1	Collagen alpha-1(XXIII) chain	Q86Y22	0.0316795	0.0468684	0.0199968	0.0534135	0.025891	0.340219	0.0316795	0.0468684
A2M	3708-62	SL000252	a2-Macroglobulin	Alpha-2-macroglobulin	P01023	0.0413981	0.145881	0.0608536	0.0928749	0.0681768	0.0669456	0.0413981	0.145881
ISG15	14151-4	SL015510	UCRP	Ubiquitin-like protein ISG15	P05161	0.0210868	0.0549589	0.01664	0.0376256	0.0203927	0.0474677	0.0210868	0.0549589
LY9	3324-51	SL007674	LY9	T-lymphocyte surface antigen Ly-9	Q9HBG7	0.0434054	0.230519	0.0233197	0.0419942	0.0327953	0.0508281	0.0434054	0.230519
TDGF1	5810-25	SL005155	Cripto	Teratocarcinoma-derived growth factor 1	P13385	0.018942	0.161456	0.0172404	0.0298047	0.0295969	0.0478707	0.018942	0.161456
CXCL9	9188-119	SL003188	MIG	C-X-C motif chemokine 9	Q07325	0.0125517	0.0962845	0.0234505	0.0245153	0.0228474	0.0297119	0.0125517	0.0962845
AKR7A2	4188-1	SL003658	Aflatoxin B1 aldehyde reductase	Aflatoxin B1 aldehyde reductase member 2	O43488	0.0386113	0.0506863	0.0326665	0.0761591	0.0258861	0.0396308	0.0386113	0.0506863
PPID	5202-4	SL007373	PPID	Peptidyl-prolyl cis-trans isomerase D	Q08752	0.0563537	0.285443	0.0307274	0.0747516	0.0550935	0.0803357	0.0563537	0.285443
IL6	4673-13	SL000087	IL-6	Interleukin-6	P05231	0.0279411	0.0771813	0.0313649	0.0598688	0.0372819	0.0562747	0.0279411	0.0771813
CXCL13	3487-32	SL003167	BLC	C-X-C motif chemokine 13	O43927	0.0258404	0.40995	0.0312952	0.0271538	0.0219956	0.0402476	0.0258404	0.40995
CA7	3356-50	SL004868	Carbonic anhydrase VII	Carbonic anhydrase 7	P43166	0.0257727	0.112264	0.0170419	0.037058	0.023654	0.0400001	0.0257727	0.112264
CEBPB	10337-83	SL007136	CEBPB	CCAAT/enhancer-binding protein beta	P17676	0.0651775	0.0614361	0.0501379	0.0839638	0.0414593	0.079795	0.0651775	0.0614361
PIGR	3216-2	SL005797	PIGR	Polymeric immunoglobulin receptor	P01833	0.0160479	0.0767189	0.027389	0.0252704	0.0162743	0.0316229	0.0160479	0.0767189
LMAN2	7638-30	SL005403	Lectin, mannose-binding 2	Vesicular integral-membrane protein VIP36	Q12907	0.0359536	0.0346124	0.0208473	0.0537033	0.0428174	0.0485937	0.0359536	0.0346124
CHI3L1	11104-13	SL003340	YKL-40	Chitinase-3-like protein 1	P36222	0.0170095	0.0416632	0.0191549	0.0291936	0.0139236	0.0278423	0.0170095	0.0416632
ESD	4984-83	SL006378	Esterase D	S-formylglutathione hydrolase	P10768	0.0272339	0.310317	0.0281248	0.0405428	0.0304502	0.0375701	0.0272339	0.310317
ASAH2	3212-30	SL010375	ASAH2	Neutral ceramidase	Q9NR71	0.0220804	0.137422	0.0200892	0.0318417	0.0165362	0.0318149	0.0220804	0.137422
STAT6	10372-18	SL007229	STAT6	Signal transducer and activator of transcription 6	P42226	0.0255766	0.215191	0.0220609	0.0467814	0.0177824	0.0464796	0.0255766	0.215191
GPC5	4991-12	SL012469	GPC5	Glypican-5	P78333	0.0171557	0.0676013	0.0112548	0.0305333	0.0177354	0.0423269	0.0171557	0.0676013
CMPK1	4786-58	SL007871	Cytidylate kinase	UMP-CMP kinase	P30085	0.0373802	0.0505678	0.0146778	0.0366428	0.0317699	0.0641133	0.0373802	0.0505678
HSPD1	2682-68	SL000450	HSP 60	60 kDa heat shock protein, mitochondrial	P10809	0.0645635	0.249124	0.0929364	0.132575	0.0467125	0.0589447	0.0645635	0.249124
IL5RA	4491-4	SL005188	IL-5 Ra	Interleukin-5 receptor subunit alpha	Q01344	0.0166145	0.110964	0.0286287	0.0327502	0.0357683	0.0589745	0.0166145	0.110964
FGF19	2762-30	SL004337	FGF-19	Fibroblast growth factor 19	O95750	0.0217263	0.114132	0.0166927	0.029253	0.0275603	0.0337923	0.0217263	0.114132
SLPI	4413-3	SL001888	SLPI	Antileukoproteinase	P03973	0.0282336	0.0388602	0.0252358	0.0723852	0.0251562	0.0319446	0.0282336	0.0388602
EFNA5	2615-60	SL004141	Ephrin-A5	Ephrin-A5	P52803	0.0216981	0.0842904	0.0303997	0.0366054	0.0296302	0.0370412	0.0216981	0.0842904
HHLA2	14132-21	SL020171	HHLA2	HERV-H LTR-associating protein 2	Q9UM44	0.0233512	0.105356	0.0203845	0.0518441	0.0270958	0.0536836	0.0233512	0.105356
LGMN	3622-33	SL008909	LGMN	Legumain	Q99538	0.0328701	0.0351024	0.012224	0.0299383	0.0278567	0.0499429	0.0328701	0.0351024
PDE7A	5178-5	SL011406	PDE7A	High affinity cAMP-specific 3',5'-cyclic phosphodiesterase 7A	Q13946	0.0155314	0.0541511	0.0179807	0.0378481	0.0211184	0.0472987	0.0155314	0.0541511
MATN3	3208-2	SL006992	MATN3	Matrilin-3	O15232	0.0271254	0.045261	0.0221056	0.0398991	0.028283	0.0414733	0.0271254	0.045261
CDH15	5410-53	SL007295	CAD15	Cadherin-15	P55291	0.0293672	0.0473721	0.0199843	0.0443432	0.0228084	0.0525919	0.0293672	0.0473721
ENTPD5	4437-56	SL014028	ENTP5	Ectonucleoside triphosphate diphosphohydrolase 5	O75356	0.0259318	0.0351161	0.0180183	0.0364098	0.0166132	0.0427404	0.0259318	0.0351161
SFN	4829-43	SL001737	STRATIFIN	14-3-3 protein sigma	P31947	0.0195084	0.034395	0.0297027	0.0372587	0.0137014	0.0275601	0.0195084	0.034395
FCN2	3313-21	SL006542	FCN2	Ficolin-2	Q15485	0.0300651	0.092475	0.0227264	0.0510164	0.0285054	0.0633891	0.0300651	0.092475
CD207	3361-26	SL010610	CLC4K	C-type lectin domain family 4 member K	Q9UJ71	0.0320178	0.156978	0.0163732	0.0345102	0.0264942	0.0450657	0.0320178	0.156978
SLITRK1	3643-90	SL008760	SLIK1	SLIT and NTRK-like protein 1	Q96PX8	0.0377525	0.0374196	0.0238772	0.0423059	0.0410655	0.0972499	0.0377525	0.0374196
FLRT1	4547-59	SL014071	FLRT1	Leucine-rich repeat transmembrane protein FLRT1	Q9NZU1	0.0176567	0.0192887	0.0208225	0.0345286	0.0164117	0.0389771	0.0176567	0.0192887
ULBP1	3081-70	SL005227	ULBP-1	NKG2D ligand 1	Q9BZM6	0.0220042	0.0708888	0.0244909	0.0353529	0.0194216	0.0221881	0.0220042	0.0708888
PGD	4187-49	SL000247	6-Phosphogluconate dehydrogenase	6-phosphogluconate dehydrogenase, decarboxylating	P52209	0.0981722	0.109448	0.0374471	0.0948882	0.0464044	0.0768662	0.0981722	0.109448
IMPDH1	5229-90	SL014735	IMDH1	Inosine-5'-monophosphate dehydrogenase 1	P20839	0.0170878	0.0346735	0.00967984	0.0244986	0.019189	0.0329914	0.0170878	0.0346735
CD163	5028-59	SL005764	sCD163	Scavenger receptor cysteine-rich type 1 protein M130	Q86VB7	0.0296189	0.0645483	0.0138029	0.0300273	0.026856	0.0310452	0.0296189	0.0645483
GSN	4775-34	SL005572	Gelsolin	Gelsolin	P06396	0.0519637	0.0613929	0.0434223	0.056266	0.028574	0.0408241	0.0519637	0.0613929
YWHAE	14157-21	SL004984	14-3-3E	14-3-3 protein epsilon	P62258	0.0246913	0.137318	0.0254062	0.0399872	0.0451388	0.043453	0.0246913	0.137318
PCNA	2915-6	SL000131	PCNA	Proliferating cell nuclear antigen	P12004	0.0244127	0.246632	0.0176478	0.0296	0.0179863	0.0245496	0.0244127	0.246632
ING1	3888-8	SL009628	ING1	Inhibitor of growth protein 1	Q9UK53	0.0231534	0.0498192	0.0378339	0.0464222	0.0236466	0.0417197	0.0231534	0.0498192
MIF	5356-2	SL003080	MIF	Macrophage migration inhibitory factor	P14174	0.0291181	0.063497	0.0175789	0.0391316	0.032736	0.0568313	0.0291181	0.063497
SUMO3	9169-14	SL018938	SUMO3	Small ubiquitin-related modifier 3	P55854	0.0323253	0.0494238	0.0315804	0.043551	0.0268938	0.0345286	0.0323253	0.0494238
KDR	3651-50	SL003201	VEGF sR2	Vascular endothelial growth factor receptor 2	P35968	0.0176352	0.0411705	0.0141189	0.0278005	0.0214686	0.0262838	0.0176352	0.0411705
CPNE1	5346-24	SL011808	CPNE1	Copine-1	Q99829	0.0238297	0.155851	0.0291102	0.0432921	0.0159679	0.0434152	0.0238297	0.155851
IL17B	3499-77	SL004350	IL-17B	Interleukin-17B	Q9UHF5	0.0271004	0.0571743	0.0219498	0.0424232	0.0152009	0.0386867	0.0271004	0.0571743
ACP5	3232-28	SL004118	TrATPase	Tartrate-resistant acid phosphatase type 5	P13686	0.0230431	0.0640579	0.0159569	0.0224208	0.0220894	0.0223253	0.0230431	0.0640579
HDAC8	2859-69	SL004723	HDAC8	Histone deacetylase 8	Q9BY41	0.0212758	0.042681	0.0168257	0.0392273	0.0208831	0.0346093	0.0212758	0.042681
PRKCA	2644-11	SL000551	PKC-A	Protein kinase C alpha type	P17252	0.0141361	0.15445	0.0265349	0.0574542	0.0274724	0.0337978	0.0141361	0.15445
ANGPTL4	3796-79	SL007642	ANGL4	Angiopoietin-related protein 4	Q9BY76	0.0362493	0.212441	0.0200422	0.0351964	0.0239136	0.0513125	0.0362493	0.212441
AURKB	3346-72	SL010520	AURKB	Aurora kinase B	Q96GD4	0.0144843	0.0973308	0.0166683	0.0436142	0.0139924	0.043222	0.0144843	0.0973308
NAAA	3173-49	SL008611	ASAHL	N-acylethanolamine-hydrolyzing acid amidase	Q02083	0.0256642	0.177626	0.0221191	0.0423311	0.027835	0.03143	0.0256642	0.177626
ITIH4	4811-33	SL004739	ITI heavy chain H4	Inter-alpha-trypsin inhibitor heavy chain H4	Q14624	0.0458168	0.0709646	0.0414453	0.0517404	0.0639171	0.0721208	0.0458168	0.0709646
JAM2	2997-8	SL005193	JAM-B	Junctional adhesion molecule B	P57087	0.0287187	0.0535285	0.0170282	0.0313234	0.0117816	0.022832	0.0287187	0.0535285
CNDP1	5456-59	SL006694	CNDP1	Beta-Ala-His dipeptidase	Q96KN2	0.0384709	0.0610914	0.0465774	0.106753	0.0611749	0.275286	0.0384709	0.0610914
SCT	3728-52	SL000570	Secretin	Secretin	P09683	0.0245687	0.0549507	0.0198616	0.038749	0.0169669	0.0417425	0.0245687	0.0549507
BCL2L2	13097-11	SL003774	Apoptosis regulator Bcl-W	Bcl-2-like protein 2	Q92843	0.016059	0.0307532	0.0223272	0.036226	0.0263096	0.0377778	0.016059	0.0307532
ABL2	5261-13	SL010488	ABL2	Abelson tyrosine-protein kinase 2	P42684	0.0297197	0.0349938	0.0121707	0.0299528	0.0218371	0.0444585	0.0297197	0.0349938
MAPK13	5006-71	SL006993	MK13	Mitogen-activated protein kinase 13	O15264	0.0100456	0.0748516	0.0198031	0.0412725	0.0154962	0.0440951	0.0100456	0.0748516
FGF4	4123-60	SL003171	FGF-4	Fibroblast growth factor 4	P08620	0.0414392	0.111058	0.0245397	0.0513159	0.0164987	0.0410535	0.0414392	0.111058
FGA FGB FGG	2796-62	SL000424	Fibrinogen	Fibrinogen	P02671 P02675 P02679	0.0920902	0.0869459	0.0520935	0.0716621	0.0384312	0.0595787	0.0920902	0.0869459
TNNI3	5441-67	SL001761	Troponin I	Troponin I, cardiac muscle	P19429	0.0184838	0.0916138	0.0225696	0.0387313	0.0171608	0.0347735	0.0184838	0.0916138
EFNB1	13104-32	SL008614	EFNB1	Ephrin-B1	P98172	0.0175898	0.0372102	0.0163699	0.0234466	0.0299684	0.0284541	0.0175898	0.0372102
CAPG	4968-50	SL008099	CAPG	Macrophage-capping protein	P40121	0.0421603	0.0496665	0.0381853	0.0419191	0.0546034	0.0559347	0.0421603	0.0496665
IL10RA	10344-334	SL005173	IL-10 Ra	Interleukin-10 receptor subunit alpha	Q13651	0.0382483	0.0579087	0.0354048	0.0662087	0.0537244	0.050649	0.0382483	0.0579087
PTN	3045-72	SL002704	PTN	Pleiotrophin	P21246	0.0179003	0.161038	0.0137787	0.0293483	0.0156977	0.0266766	0.0179003	0.161038
FLT3LG	3053-49	SL004343	Flt3 ligand	Fms-related tyrosine kinase 3 ligand	P49771	0.0248019	0.0534353	0.0190027	0.0475194	0.0205954	0.0491383	0.0248019	0.0534353
GCG	4891-50	SL000433	Glucagon	Glucagon	P01275	0.0263178	0.260752	0.0300779	0.0360874	0.0336162	0.0394683	0.0263178	0.260752
IL24	3321-2	SL007385	IL24	Interleukin-24	Q13007	0.0264442	0.161131	0.0344083	0.0597383	0.0334875	0.0448597	0.0264442	0.161131
PGF	3078-1	SL002640	PlGF	Placenta growth factor	P49763	0.0206717	0.032536	0.0244297	0.0446702	0.0132904	0.0330812	0.0206717	0.032536
DSC2	13126-52	SL008631	DSC2	Desmocollin-2	Q02487	0.0220369	0.02422	0.0164412	0.0224837	0.0339148	0.0424757	0.0220369	0.02422
ENTPD1	3182-38	SL010371	CD39	Ectonucleoside triphosphate diphosphohydrolase 1	P49961	0.0261284	0.0348144	0.0113116	0.033568	0.0134141	0.0351004	0.0261284	0.0348144
C5	2851-63	SL000320	C5a	C5a anaphylatoxin	P01031	0.0343965	0.104489	0.0329584	0.0793849	0.0602562	0.0384431	0.0343965	0.104489
LGALS8	4909-68	SL005167	Galectin-8	Galectin-8	O00214	0.0221333	0.0933066	0.0184571	0.035516	0.0281934	0.0258779	0.0221333	0.0933066
NME1	5909-51	SL003687	Nucleoside diphosphate kinase A	Nucleoside diphosphate kinase A	P15531	0.0262299	0.486499	0.0154526	0.0305147	0.0215012	0.0358968	0.0262299	0.486499
COLEC11	4430-44	SL006713	Collectin Kidney 1	Collectin-11	Q9BWP8	0.0216379	0.0605655	0.0211199	0.0319036	0.0231011	0.0276319	0.0216379	0.0605655
KRT18	5354-11	SL000655	Keratin 18	Keratin, type I cytoskeletal 18	P05783	0.0260567	0.177671	0.0269601	0.0471546	0.0512668	0.0628618	0.0260567	0.177671
RPS3	5026-66	SL008059	RS3	40S ribosomal protein S3	P23396	0.0293565	0.0677155	0.0166521	0.0392756	0.0348965	0.0755713	0.0293565	0.0677155
IRF1	10351-51	SL007108	IRF1	Interferon regulatory factor 1	P10914	0.0189006	0.166875	0.0185292	0.0363311	0.0248932	0.0375968	0.0189006	0.166875
RPS7	3864-5	SL011528	RS7	40S ribosomal protein S7	P62081	0.0167699	0.047988	0.014794	0.0383683	0.021114	0.0281667	0.0167699	0.047988
IFNB1	14127-240	SL001880	IFN-b	Interferon beta	P01574	0.0172561	0.0959405	0.0203004	0.0655158	0.0224385	0.11097	0.0172561	0.0959405
IL5	11071-1	SL000481	IL-5	Interleukin-5	P05113	0.015888	0.0618065	0.02056	0.0751089	0.0314657	0.0843018	0.015888	0.0618065
CASP2	4904-7	SL003710	Caspase-2	Caspase-2	P42575	0.024995	0.226332	0.0268417	0.0358783	0.0255418	0.0563695	0.024995	0.226332
TNC	4155-3	SL003198	Tenascin	Tenascin	P24821	0.031203	0.028362	0.0150322	0.032525	0.0200672	0.0346867	0.031203	0.028362
FIGF	13098-93	SL003320	VEGF-D	Vascular endothelial growth factor D	O43915	0.0271107	0.031102	0.0213895	0.0369855	0.0132193	0.0348098	0.0271107	0.031102
IL17RC	5468-67	SL011068	IL-17 RC	Interleukin-17 receptor C	Q8NAC3	0.0227023	0.0877156	0.0328553	0.0591043	0.0200182	0.0324616	0.0227023	0.0877156
GDF9	3067-67	SL005234	GDF-9	Growth/differentiation factor 9	O60383	0.0217942	0.0856722	0.0362213	0.0392672	0.0145614	0.037044	0.0217942	0.0856722
HS6ST1	5465-32	SL014129	H6ST1	Heparan-sulfate 6-O-sulfotransferase 1	O60243	0.0143546	0.0986288	0.0117162	0.0442685	0.0215792	0.0324406	0.0143546	0.0986288
NMT1	5196-7	SL006476	NMT1	Glycylpeptide N-tetradecanoyltransferase 1	P30419	0.0289917	0.0449765	0.0257181	0.0466818	0.0183171	0.0443632	0.0289917	0.0449765
VEGFA	2597-8	SL000002	VEGF	Vascular endothelial growth factor A	P15692	0.0234291	0.041278	0.00903625	0.028959	0.0172774	0.0252551	0.0234291	0.041278
PDE4D	5255-22	SL011404	PDE4D	cAMP-specific 3',5'-cyclic phosphodiesterase 4D	Q08499	0.0557251	0.129197	0.0720659	0.0900486	0.0733864	0.0601869	0.0557251	0.129197
SELL	4831-4	SL002823	sL-Selectin	L-Selectin	P14151	0.0263097	0.0575989	0.0174001	0.0711384	0.0173686	0.0598309	0.0263097	0.0575989
IGHM IGJ IGK@ IGL@	3069-52	SL000468	IgM	Immunoglobulin M	P01871	0.144173	0.205282	0.0342461	0.05881	0.0617489	0.0568739	0.144173	0.205282
TNFRSF9	2598-9	SL004126	4-1BB	Tumor necrosis factor receptor superfamily member 9	Q07011	0.046821	0.218998	0.0235821	0.0403921	0.0226528	0.0470017	0.046821	0.218998
F10	4878-3	SL000360	Coagulation Factor X	Coagulation Factor X	P00742	0.0574315	0.0451922	0.0225321	0.105383	0.0556926	0.0944244	0.0574315	0.0451922
PSMA6	3860-7	SL005630	PSA6	Proteasome subunit alpha type-6	P60900	0.0236768	0.0526348	0.0260659	0.0637503	0.0326236	0.0731929	0.0236768	0.0526348
CXCL3 CXCL2	2986-49	SL017610	Gro-b/g	Gro-beta/gamma	P19876 P19875	0.05858	0.251445	0.034563	0.0408297	0.0292181	0.0574687	0.05858	0.251445
CDK2 CCNA2	3357-67	SL010495	CDK2/cyclin A	Cyclin-dependent kinase 2:Cyclin-A2 complex	P24941 P20248	0.0248386	0.100604	0.0204321	0.0369338	0.0144975	0.026999	0.0248386	0.100604
FGF8	4394-71	SL014308	FGF-8A	Fibroblast growth factor 8 isoform A	P55075	0.0383724	0.0788131	0.0255882	0.0517335	0.0191278	0.0628962	0.0383724	0.0788131
WISP3	5927-4	SL004690	WISP-3	WNT1-inducible-signaling pathway protein 3	O95389	0.0560709	0.181455	0.0413788	0.0473405	0.0551477	0.0556416	0.0560709	0.181455
NTF4	4146-58	SL004360	Neurotrophin-5	Neurotrophin-4	P34130	0.029606	0.049567	0.0216215	0.0329916	0.0167892	0.0369709	0.029606	0.049567
CSK	3363-31	SL004781	CSK	Tyrosine-protein kinase CSK	P41240	0.039038	0.160705	0.0260373	0.0681163	0.0328125	0.0411636	0.039038	0.160705
CHKB	13117-232	SL018256	CHKB	Choline/ethanolamine kinase	Q9Y259	0.0432891	0.0961735	0.0342409	0.0411518	0.0366111	0.0554697	0.0432891	0.0961735
FUT3	4548-4	SL005575	Fucosyltransferase 3	Galactoside 3(4)-L-fucosyltransferase	P21217	0.0344175	0.076587	0.0114268	0.0299052	0.0274983	0.0300024	0.0344175	0.076587
CD109	3290-50	SL008773	CD109	CD109 antigen	Q6YHK3	0.0300145	0.0751219	0.0146612	0.0329813	0.0399982	0.0508534	0.0300145	0.0751219
FSTL1	13112-179	SL009349	FSTL1	Follistatin-related protein 1	Q12841	0.0365791	0.0432086	0.014551	0.0304721	0.0385602	0.0298566	0.0365791	0.0432086
MAPT	5854-60	SL004230	tau	Microtubule-associated protein tau	P10636	0.0260704	0.085839	0.0291344	0.0512949	0.0249658	0.0288698	0.0260704	0.085839
CFHR5	3666-17	SL006830	complement factor H-related 5	Complement factor H-related protein 5	Q9BXR6	0.050301	0.0538583	0.0289476	0.0599161	0.0656863	0.0575054	0.050301	0.0538583
ICAM5	5124-69	SL005169	sICAM-5	Intercellular adhesion molecule 5	Q9UMF0	0.022916	0.131173	0.0289886	0.0300333	0.0272818	0.0319324	0.022916	0.131173
CAMK1D	3418-12	SL010490	CAMK1D	Calcium/calmodulin-dependent protein kinase type 1D	Q8IU85	0.032065	0.058841	0.0236114	0.0392634	0.0203986	0.0383119	0.032065	0.058841
SELE	3470-1	SL001945	sE-Selectin	E-selectin	P16581	0.0252852	0.0789265	0.0179164	0.0305389	0.0257864	0.029877	0.0252852	0.0789265
MRC2	3041-55	SL008416	MRC2	C-type mannose receptor 2	Q9UBG0	0.0232556	0.0429219	0.0141258	0.0339837	0.0474641	0.0463895	0.0232556	0.0429219
FSTL3	3438-10	SL009324	FSTL3	Follistatin-related protein 3	O95633	0.0158906	0.0272964	0.0200325	0.028091	0.034677	0.0316501	0.0158906	0.0272964
ICOSLG	5061-27	SL004853	B7-H2	ICOS ligand	O75144	0.0339102	0.101165	0.0858157	0.079492	0.0932503	0.0639183	0.0339102	0.101165
VIP	3522-57	SL000615	Vasoactive Intestinal Peptide	Vasoactive Intestinal Peptide	P01282	0.0368796	0.0420494	0.0159454	0.0397411	0.0235266	0.0646543	0.0368796	0.0420494
PDE1A	5253-1	SL011400	PDE1A	Calcium/calmodulin-dependent 3',5'-cyclic nucleotide phosphodiesterase 1A	P54750	0.0309402	0.0570102	0.0351573	0.0470536	0.0164288	0.0356375	0.0309402	0.0570102
FLT4	2358-19	SL003322	VEGF sR3	Vascular endothelial growth factor receptor 3	P35916	0.0320507	0.0331569	0.0152013	0.0428898	0.0180604	0.0344615	0.0320507	0.0331569
N6AMT1	11096-57	SL018921	HEMK2	HemK methyltransferase family member 2	Q9Y5N5	0.0298322	0.0454466	0.0227331	0.0322921	0.0284366	0.0416643	0.0298322	0.0454466
MMP14	5002-76	SL002646	MMP-14	Matrix metalloproteinase-14	P50281	0.0393889	0.227635	0.0609463	0.0708311	0.0536196	0.0573821	0.0393889	0.227635
SPHK1	4294-16	SL006088	Sphingosine kinase 1	Sphingosine kinase 1	Q9NYA1	0.0226459	0.121345	0.027486	0.0465857	0.0242881	0.0419077	0.0226459	0.121345
PDXP	3897-61	SL011709	PLPP	Pyridoxal phosphate phosphatase	Q96GD0	0.0254821	0.0487742	0.0247663	0.0468614	0.0400214	0.0375199	0.0254821	0.0487742
MED1	5470-69	SL010328	MED-1	Mediator of RNA polymerase II transcription subunit 1	Q15648	0.103893	0.0830002	0.075736	0.106546	0.070084	0.0840708	0.103893	0.0830002
INHBA INHBB	8467-9	SL004837	Activin AB	Inhibin beta A chain:Inhibin beta B chain heterodimer	P08476 P09529	0.0232947	0.0522301	0.0128362	0.0202333	0.0158545	0.0250421	0.0232947	0.0522301
GRAP2	5265-12	SL005725	GRB2-related adapter protein 2	GRB2-related adapter protein 2	O75791	0.019767	0.189194	0.0178917	0.0506938	0.0154479	0.0500288	0.019767	0.189194
BMPER	3654-27	SL007531	BMPER	BMP-binding endothelial regulator protein	Q8N8U9	0.0345141	0.0444715	0.0166656	0.0517934	0.0161343	0.0700604	0.0345141	0.0444715
CCL13	4144-13	SL000517	MCP-4	C-C motif chemokine 13	Q99616	0.0229492	0.0989384	0.0161157	0.029607	0.0104962	0.0275013	0.0229492	0.0989384
SNAP25	13105-7	SL007311	SNP25	Synaptosomal-associated protein 25	P60880	0.0498443	0.0524162	0.0666627	0.0987689	0.102893	0.0761002	0.0498443	0.0524162
IL13RA1	2633-52	SL004149	IL-13 Ra1	Interleukin-13 receptor subunit alpha-1	P78552	0.0520977	0.078318	0.0381371	0.0838362	0.0453985	0.0642992	0.0520977	0.078318
F7	3184-25	SL000358	Coagulation Factor VII	Coagulation factor VII	P08709	0.0637184	0.0860785	0.0267234	0.0784845	0.0326403	0.0384393	0.0637184	0.0860785
SIRT2	5030-52	SL006629	SIRT2	NAD-dependent protein deacetylase sirtuin-2	Q8IXJ6	0.0426456	0.126662	0.0210695	0.0413683	0.0217958	0.0297042	0.0426456	0.126662
FAP	5029-3	SL006528	SEPR	Prolyl endopeptidase FAP	Q12884	0.0250739	0.0925701	0.014423	0.0335274	0.0325414	0.0270264	0.0250739	0.0925701
TNFRSF8	2605-49	SL004180	CD30	Tumor necrosis factor receptor superfamily member 8	P28908	0.0258827	0.0431389	0.0156757	0.0360657	0.0170726	0.029765	0.0258827	0.0431389
HK1	13131-5	SL011180	HXK1	Hexokinase-1	P19367	0.0365726	0.217855	0.0307481	0.0528668	0.0331872	0.0475258	0.0365726	0.217855
LYN	3381-24	SL010500	LYNB	Tyrosine-protein kinase Lyn, isoform B	P07948	0.0299413	0.0748958	0.0229313	0.052225	0.0285363	0.0271942	0.0299413	0.0748958
YES1	2878-66	SL006372	YES	Tyrosine-protein kinase Yes	P07947	0.0190756	0.0360962	0.0217518	0.0326088	0.0238521	0.0304383	0.0190756	0.0360962
SLAMF6	5128-53	SL014228	SLAF6	SLAM family member 6	Q96DU3	0.0256964	0.0350711	0.0385334	0.0450374	0.0345071	0.0430291	0.0256964	0.0350711
IFNG	14147-50	SL001802	IFN-g	Interferon gamma	P01579	0.0193361	0.0317079	0.0200766	0.0633267	0.0244229	0.0372018	0.0193361	0.0317079
TYRO3	2611-72	SL004136	Dtk	Tyrosine-protein kinase receptor TYRO3	Q06418	0.0218646	0.106084	0.0303171	0.0364321	0.0271448	0.0354649	0.0218646	0.106084
NCR1	5104-57	SL005207	NKp46	Natural cytotoxicity triggering receptor 1	O76036	0.0170727	0.0673812	0.0131507	0.0351073	0.0243541	0.0377016	0.0170727	0.0673812
CD38	11513-92	SL002722	CD38	ADP-ribosyl cyclase/cyclic ADP-ribose hydrolase 1	P28907	0.0229594	0.0481059	0.0261578	0.0459744	0.0422766	0.0390007	0.0229594	0.0481059
TK1	4301-58	SL000057	Thymidine kinase	Thymidine kinase, cytosolic	P04183	0.0199668	0.0365262	0.0191163	0.0351312	0.0296953	0.0316502	0.0199668	0.0365262
MAPKAPK5	3821-28	SL010504	MAPK5	MAP kinase-activated protein kinase 5	Q8IW41	0.0205538	0.044987	0.0267324	0.0377876	0.0281446	0.0329865	0.0205538	0.044987
GSK3A GSK3B	3441-64	SL017188	GSK-3 alpha/beta	Glycogen synthase kinase-3 alpha/beta	P49840 P49841	0.0174979	0.124574	0.0157986	0.0414577	0.0142565	0.0409431	0.0174979	0.124574
CD70	5807-77	SL007195	CD70	CD70 antigen	P32970	0.0288188	0.31808	0.0285618	0.0507105	0.0219177	0.0334272	0.0288188	0.31808
ANK2	7624-19	SL014896	ANK2	Ankyrin-2	Q01484	0.0182418	0.050001	0.0199954	0.0388712	0.0171038	0.0352696	0.0182418	0.050001
SBDS	3866-7	SL011529	SBDS	Ribosome maturation protein SBDS	Q9Y3A5	0.0317674	0.130204	0.0467063	0.0635435	0.0670386	0.053686	0.0317674	0.130204
CSRP3	9171-11	SL016969	CSRP3	Cysteine and glycine-rich protein 3	P50461	0.0264496	0.0478373	0.0180007	0.0412121	0.0215632	0.0399232	0.0264496	0.0478373
MAPK3	2855-49	SL000409	ERK-1	Mitogen-activated protein kinase 3	P27361	0.0197722	0.0445856	0.0208654	0.0431737	0.0272065	0.029762	0.0197722	0.0445856
EIF4EBP2	4184-43	SL008378	4EBP2	Eukaryotic translation initiation factor 4E-binding protein 2	Q13542	0.0283449	0.316866	0.0153839	0.0402941	0.0177091	0.0302543	0.0283449	0.316866
KREMEN2	3202-28	SL010393	KREM2	Kremen protein 2	Q8NCW0	0.0173921	0.0342544	0.0139841	0.0470423	0.0209795	0.0355015	0.0173921	0.0342544
DDR2	3606-2	SL004120	Discoidin domain receptor 2	Discoidin domain-containing receptor 2	Q16832	0.0223142	0.0292921	0.0229057	0.0470237	0.0273229	0.0359505	0.0223142	0.0292921
CA1	4969-2	SL004866	Carbonic anhydrase I	Carbonic anhydrase 1	P00915	0.0234797	0.121388	0.0221046	0.029633	0.0230048	0.0346033	0.0234797	0.121388
TNFSF13B	3059-50	SL004327	BAFF	Tumor necrosis factor ligand superfamily member 13B	Q9Y275	0.0259863	0.0722711	0.0313435	0.060396	0.028188	0.0564027	0.0259863	0.0722711
HAAO	5861-78	SL008466	3HAO	3-hydroxyanthranilate 3,4-dioxygenase	P46952	0.0458847	0.100823	0.0445398	0.0888295	0.0572496	0.0625642	0.0458847	0.100823
THBS4	3340-53	SL007207	TSP4	Thrombospondin-4	P35443	0.0966865	0.134633	0.0352674	0.0777717	0.0460322	0.0450628	0.0966865	0.134633
LTA	4703-87	SL000597	TNF-b	Lymphotoxin-alpha	P01374	0.0442912	0.16019	0.0224813	0.0419322	0.0224647	0.0475531	0.0442912	0.16019
CLEC4M	3030-3	SL005158	DC-SIGNR	C-type lectin domain family 4 member M	Q9H2X3	0.0556737	0.0461464	0.0382027	0.0741014	0.0529892	0.0518932	0.0556737	0.0461464
RPS6KA5	3865-53	SL006919	RSK-like protein kinase	Ribosomal protein S6 kinase alpha-5	O75582	0.0274059	0.0685472	0.0214697	0.0634418	0.0268818	0.0504292	0.0274059	0.0685472
HRG	4996-66	SL006448	HRG	Histidine-rich glycoprotein	P04196	0.0989194	0.0757307	0.0467406	0.0804153	0.0764351	0.105955	0.0989194	0.0757307
CXCL11	3038-9	SL003326	I-TAC	C-X-C motif chemokine 11	O14625	0.0211555	0.269482	0.0232281	0.041105	0.0259396	0.0371586	0.0211555	0.269482
STAT1	10370-21	SL004396	STAT1	Signal transducer and activator of transcription 1-alpha/beta	P42224	0.0245565	0.0431396	0.0149707	0.0407987	0.0150765	0.0507722	0.0245565	0.0431396
CCL7	4886-3	SL000516	MCP-3	C-C motif chemokine 7	P80098	0.0128486	0.0550384	0.0179223	0.0285403	0.0205968	0.027692	0.0128486	0.0550384
ANXA1	4960-72	SL004208	annexin I	Annexin A1	P04083	0.0241256	0.123274	0.0236745	0.0335754	0.0203136	0.0372999	0.0241256	0.123274
MAP2K4	5242-37	SL007237	MP2K4	Dual specificity mitogen-activated protein kinase kinase 4	P45985	0.0485605	0.0888258	0.0707207	0.0878812	0.0331083	0.0469543	0.0485605	0.0888258
FCRL3	4440-15	SL014088	FCRL3	Fc receptor-like protein 3	Q96P31	0.0320568	0.164946	0.0159764	0.0306602	0.0318847	0.0267723	0.0320568	0.164946
DNAJC19	4545-53	SL006197	DnaJ homolog	Mitochondrial import inner membrane translocase subunit TIM14	Q96DA6	0.0217392	0.036447	0.0146135	0.0267854	0.0157813	0.0329811	0.0217392	0.036447
BGN	3284-75	SL007804	BGN	Biglycan	P21810	0.0403868	0.0901882	0.0274798	0.0460757	0.0374798	0.0556262	0.0403868	0.0901882
IMPDH2	5250-53	SL010928	IMDH2	Inosine-5'-monophosphate dehydrogenase 2	P12268	0.0305525	0.0334697	0.0288546	0.034443	0.0254151	0.0434915	0.0305525	0.0334697
TNFRSF18	5526-53	SL004859	GITR	Tumor necrosis factor receptor superfamily member 18	Q9Y5U5	0.0239475	0.230515	0.028689	0.0515219	0.0381528	0.0583746	0.0239475	0.230515
CNTFR	2711-6	SL005153	CNTFR alpha	Ciliary neurotrophic factor receptor subunit alpha	P26992	0.0335955	0.0795013	0.0317455	0.0393609	0.022884	0.0468939	0.0335955	0.0795013
IDUA	3169-70	SL010368	IDUA	Alpha-L-iduronidase	P35475	0.0247065	0.0796185	0.0220874	0.0320531	0.0204559	0.0241368	0.0247065	0.0796185
UFC1	3405-6	SL010529	UFC1	Ubiquitin-fold modifier-conjugating enzyme 1	Q9Y3C8	0.0202534	0.128997	0.0167185	0.0268856	0.0181888	0.0288569	0.0202534	0.128997
SERPINA4	3449-58	SL004876	Kallistatin	Kallistatin	P29622	0.041623	0.0408932	0.0221633	0.0614099	0.030632	0.0427527	0.041623	0.0408932
CCL24	4128-27	SL003104	Eotaxin-2	C-C motif chemokine 24	O00175	0.0329135	0.0362399	0.0145847	0.064263	0.0138625	0.0576506	0.0329135	0.0362399
IFNL1	4396-54	SL004348	IFN-lambda 1	Interferon lambda-1	Q8IU54	0.0247243	0.0504775	0.031444	0.0438624	0.0318509	0.0908999	0.0247243	0.0504775
POMC	9204-33	SL009210	Corticotropin-lipotropin	Pro-opiomelanocortin	P01189	0.027339	0.037194	0.0230838	0.0292032	0.0426964	0.0604683	0.027339	0.037194
MMP1	4924-32	SL000521	MMP-1	Interstitial collagenase	P03956	0.0227492	0.217639	0.0238192	0.0352557	0.0161959	0.0333231	0.0227492	0.217639
ULBP2	3082-9	SL005228	ULBP-2	NKG2D ligand 2	Q9BZM5	0.0201441	0.127645	0.0179398	0.0513696	0.0243285	0.0387355	0.0201441	0.127645
ROBO3	5117-14	SL014148	ROBO3	Roundabout homolog 3	Q96MS0	0.0228884	0.0401786	0.0161934	0.0356193	0.037877	0.0282768	0.0228884	0.0401786
BMP10	3587-53	SL007056	BMP10	Bone morphogenetic protein 10	O95393	0.0214941	0.0389715	0.0156675	0.0387881	0.025805	0.0515897	0.0214941	0.0389715
EDAR	2977-7	SL004872	EDAR	Tumor necrosis factor receptor superfamily member EDAR	Q9UNE0	0.0165733	0.0617445	0.0247182	0.0357489	0.0275565	0.0295212	0.0165733	0.0617445
COTL1	4905-63	SL004814	Coactosin-like protein	Coactosin-like protein	Q14019	0.0262566	0.184719	0.0148148	0.0349225	0.0310187	0.0326039	0.0262566	0.184719
IGF1R	4232-19	SL003304	IGF-I sR	Insulin-like growth factor 1 receptor	P08069	0.0387478	0.0557281	0.0383357	0.0676647	0.0366197	0.0388702	0.0387478	0.0557281
CCL19	4922-13	SL003189	MIP-3b	C-C motif chemokine 19	Q99731	0.0174668	0.0965618	0.0179809	0.0224346	0.0131344	0.0333682	0.0174668	0.0965618
MET	2837-3	SL000134	Met	Hepatocyte growth factor receptor	P08581	0.0289545	0.0314401	0.0326734	0.0409309	0.0289601	0.0338519	0.0289545	0.0314401
ALCAM	5451-1	SL003166	ALCAM	CD166 antigen	Q13740	0.0212036	0.0593606	0.0169709	0.0237645	0.0233213	0.0263037	0.0212036	0.0593606
BRF1	5384-67	SL016130	BRF-1	Transcription factor IIIB 90 kDa subunit	Q92994	0.0314006	0.323905	0.0195194	0.0322407	0.0341836	0.048856	0.0314006	0.323905
EFNA2	14124-6	SL004843	Ephrin-A2	Ephrin-A2	O43921	0.0154719	0.0386774	0.0324293	0.0454269	0.0225649	0.0305756	0.0154719	0.0386774
ICOS	2988-57	SL005170	ICOS	Inducible T-cell costimulator	Q9Y6W8	0.0165272	0.0399561	0.015248	0.0546379	0.0101108	0.0695113	0.0165272	0.0399561
TPSG1	3404-51	SL010619	TPSG1	Tryptase gamma	Q9NRR2	0.053862	0.35805	0.0184099	0.0441989	0.0273815	0.0500212	0.053862	0.35805
BGLAP	11067-13	SL001791	Osteocalcin	Osteocalcin	P02818	0.0163741	0.0256661	0.0197394	0.0485298	0.0177937	0.038601	0.0163741	0.0256661
PGK1	5020-50	SL003653	phosphoglycerate kinase 1	Phosphoglycerate kinase 1	P00558	0.0295924	0.482012	0.0259383	0.0475576	0.0401614	0.0433819	0.0295924	0.482012
PDE5A	5256-86	SL011405	PDE5A	cGMP-specific 3',5'-cyclic phosphodiesterase	O76074	0.0225866	0.190834	0.0294024	0.0573254	0.0311638	0.0375358	0.0225866	0.190834
CASP10	5340-24	SL003717	Caspase-10	Caspase-10	Q92851	0.0196022	0.247786	0.0142832	0.032207	0.0199678	0.0268879	0.0196022	0.247786
CCL23	2913-1	SL003302	MPIF-1	C-C motif chemokine 23	P55773	0.0145618	0.0659295	0.02436	0.0282703	0.0193681	0.0366154	0.0145618	0.0659295
ICAM2	5486-73	SL003177	sICAM-2	Intercellular adhesion molecule 2	P13598	0.0523278	0.0626567	0.0467669	0.09888	0.0665791	0.0550696	0.0523278	0.0626567
ANP32B	4194-26	SL011769	AN32B	Acidic leucine-rich nuclear phosphoprotein 32 family member B	Q92688	0.0583617	0.142661	0.0287231	0.0404713	0.0292884	0.036641	0.0583617	0.142661
RSPO4	8464-31	SL012517	RSPO4	R-spondin-4	Q2I0M5	0.0301119	0.109152	0.0229877	0.070531	0.0338596	0.0554272	0.0301119	0.109152
TPSB2	3403-1	SL010617	TPSB2	Tryptase beta-2	P20231	0.0238491	0.224231	0.0322317	0.0563101	0.0210609	0.0212284	0.0238491	0.224231
TNFSF12	5939-42	SL004365	TWEAK	Tumor necrosis factor ligand superfamily member 12	O43508	0.0203489	0.0763344	0.021188	0.035105	0.0218144	0.037395	0.0203489	0.0763344
WFIKKN1	3191-50	SL012783	WFKN1	WAP, kazal, immunoglobulin, kunitz and NTR domain-containing protein 1	Q96NZ8	0.0322101	0.185269	0.0277582	0.0488023	0.0219439	0.0354449	0.0322101	0.185269
SERPIND1	3316-58	SL004466	Heparin cofactor II	Heparin cofactor 2	P05546	0.0724111	0.113261	0.0272322	0.0561716	0.0237034	0.116821	0.0724111	0.113261
CX3CL1	2827-23	SL000427	Fractalkine/CX3CL-1	Fractalkine	P78423	0.0506089	0.188746	0.10506	0.0850873	0.0535718	0.0456128	0.0506089	0.188746
PTK6	3832-51	SL010514	PTK6	Protein-tyrosine kinase 6	Q13882	0.0249751	0.140548	0.0202252	0.0391429	0.018241	0.0360257	0.0249751	0.140548
PRKCZ	2645-54	SL000557	PKC-Z	Protein kinase C zeta type	Q05513	0.022556	0.0617153	0.0166662	0.049875	0.0197481	0.0324078	0.022556	0.0617153
APOB	2797-56	SL000020	Apo B	Apolipoprotein B	P04114	0.0487022	0.258494	0.0503122	0.0487385	0.0522383	0.062307	0.0487022	0.258494
LYN	3453-87	SL006917	LYN	Tyrosine-protein kinase Lyn	P07948	0.034508	0.0911862	0.0320158	0.0623405	0.0313548	0.0303178	0.034508	0.0911862
SMOC1	13118-5	SL011888	SMOC1	SPARC-related modular calcium-binding protein 1	Q9H4F8	0.0289474	0.0721912	0.0181826	0.037312	0.0325811	0.0390113	0.0289474	0.0721912
LGALS2	3033-57	SL005164	Galectin-2	Galectin-2	P05162	0.019839	0.615798	0.0201234	0.0604724	0.0186324	0.0628764	0.019839	0.615798
TEC	3646-7	SL010518	TEC	Tyrosine-protein kinase Tec	P42680	0.0171229	0.0726587	0.0243053	0.0789707	0.0240035	0.0838061	0.0171229	0.0726587
SHC1	5272-55	SL014469	SHC1	SHC-transforming protein 1	P29353	0.014482	0.0371171	0.0149643	0.0326785	0.0179293	0.038445	0.014482	0.0371171
GDI2	2647-66	SL003648	Rab GDP dissociation inhibitor beta	Rab GDP dissociation inhibitor beta	P50395	0.0168044	0.0637425	0.0317686	0.0348883	0.0179571	0.0258368	0.0168044	0.0637425
DYNLL1	3881-49	SL003753	DLC8	Dynein light chain 1, cytoplasmic	P63167	0.0239471	0.173652	0.0201558	0.0305962	0.0195225	0.0270477	0.0239471	0.173652
PDE2A	5246-64	SL005730	cGMP-stimulated PDE	cGMP-dependent 3',5'-cyclic phosphodiesterase	O00408	0.0566311	0.0513272	0.0294155	0.0634804	0.0358219	0.130714	0.0566311	0.0513272
MB	3042-7	SL000164	Myoglobin	Myoglobin	P02144	0.0204155	0.0492278	0.0258945	0.080328	0.0300298	0.038596	0.0204155	0.0492278
IL22	2778-10	SL004347	IL-22	Interleukin-22	Q9GZX6	0.0188272	0.0657535	0.0349644	0.0288455	0.0282882	0.0605016	0.0188272	0.0657535
CA4	3177-49	SL010369	Carbonic Anhydrase IV	Carbonic anhydrase 4	P22748	0.0358846	0.0786042	0.0297705	0.057664	0.0490818	0.0678389	0.0358846	0.0786042
PLG	4151-6	SL000541	Plasminogen	Plasminogen	P00747	0.0592095	0.0906347	0.019416	0.106541	0.035557	0.0424428	0.0592095	0.0906347
LGALS4	2982-82	SL005165	Galectin-4	Galectin-4	P56470	0.0206218	0.039352	0.0157958	0.028852	0.0179732	0.0414619	0.0206218	0.039352
KIF23	5228-25	SL006189	KIF23	Kinesin-like protein KIF23	Q02241	0.0252072	0.154434	0.0126479	0.0469057	0.0234466	0.0435231	0.0252072	0.154434
METAP1	3210-1	SL010374	METAP1	Methionine aminopeptidase 1	P53582	0.0399478	0.183612	0.0239394	0.070811	0.0240616	0.0564088	0.0399478	0.183612
CST2	4324-33	SL008516	CYTT	Cystatin-SA	P09228	0.028046	0.638244	0.0330684	0.0439361	0.0290397	0.0435453	0.028046	0.638244
CA9	3798-71	SL005508	Carbonic anhydrase 9	Carbonic anhydrase 9	Q16790	0.0504478	0.290772	0.0429322	0.0848947	0.017865	0.0380135	0.0504478	0.290772
PIAS4	10342-55	SL019096	PIAS4	E3 SUMO-protein ligase PIAS4	Q8N2W9	0.0552841	0.315254	0.0426709	0.0740007	0.0889275	0.103695	0.0552841	0.315254
SH2D1A	4567-82	SL014468	SH21A	SH2 domain-containing protein 1A	O60880	0.0539698	0.148444	0.0464222	0.0709212	0.0739046	0.0738136	0.0539698	0.148444
ADRBK1	3347-9	SL002792	BARK1	beta-adrenergic receptor kinase 1	P25098	0.0245007	0.13512	0.0278931	0.0438239	0.0241504	0.0261961	0.0245007	0.13512
NRG1	9178-30	SL004297	NEUREGULIN-1	Neuregulin-1	Q02297	0.017323	0.562185	0.0232955	0.0459139	0.0238642	0.0200025	0.017323	0.562185
CAT	3488-64	SL000342	Catalase	Catalase	P04040	0.0165228	0.222815	0.0184555	0.0338147	0.024702	0.0334081	0.0165228	0.222815
MMP9	2579-17	SL000527	MMP-9	Matrix metalloproteinase-9	P14780	0.025591	0.100251	0.010925	0.0238717	0.0180722	0.0263933	0.025591	0.100251
CADM1	3326-58	SL004805	Nectin-like protein 2	Cell adhesion molecule 1	Q9BY67	0.0400059	0.0557851	0.0335854	0.0438656	0.0690571	0.0577559	0.0400059	0.0557851
DYRK3	4359-87	SL013570	DYRK3	Dual specificity tyrosine-phosphorylation-regulated kinase 3	O43781	0.0285759	0.554156	0.0189867	0.0396128	0.0302403	0.0515746	0.0285759	0.554156
PRKCI	3379-29	SL007228	KPCI	Protein kinase C iota type	P41743	0.0173916	0.101409	0.0181934	0.0322216	0.0151644	0.0502897	0.0173916	0.101409
IGHD IGK@ IGL@	4916-2	SL000460	IgD	Immunoglobulin D	P01880	0.0237508	0.691366	0.0369238	0.0277103	0.0359717	0.0311904	0.0237508	0.691366
CHST6	4429-51	SL014130	CHST6	Carbohydrate sulfotransferase 6	Q9GZX3	0.0250031	0.0519654	0.0221444	0.0414248	0.0208521	0.0475314	0.0250031	0.0519654
FCGR2B	3310-62	SL010460	FCG2B	Low affinity immunoglobulin gamma Fc region receptor II-b	P31994	0.0261934	0.0357504	0.0275828	0.0477756	0.0241145	0.030774	0.0261934	0.0357504
SLITRK5	4568-17	SL014070	SLIK5	SLIT and NTRK-like protein 5	O94991	0.0208883	0.10008	0.0280853	0.0297692	0.0239757	0.0307904	0.0208883	0.10008
TPM1	5033-27	SL004737	Tropomyosin 1 alpha chain	Tropomyosin alpha-1 chain	P09493	0.0180461	0.115495	0.0169619	0.0340347	0.014232	0.0298707	0.0180461	0.115495
IL22RA1	3620-67	SL007806	IL22RA1	Interleukin-22 receptor subunit alpha-1	Q8N6P7	0.0302115	0.061906	0.0455616	0.0613049	0.0279476	0.0759841	0.0302115	0.061906
KLK4	2833-20	SL003800	Kallikrein 4	Kallikrein-4	Q9Y5K2	0.0206781	0.236039	0.0234173	0.0491147	0.0137355	0.0272855	0.0206781	0.236039
MMP8	9172-69	SL000526	MMP-8	Neutrophil collagenase	P22894	0.0238613	0.258882	0.0166684	0.0332081	0.0111749	0.0324356	0.0238613	0.258882
CADM3	3630-27	SL004804	Nectin-like protein 1	Cell adhesion molecule 3	Q8N126	0.0238577	0.0625285	0.0242543	0.0337863	0.0230265	0.0388074	0.0238577	0.0625285
Human-virus	2624-31	SL004698	HPV E7 Type18	Protein E7_HPV18	P06788	0.0270827	0.0734914	0.0223207	0.0330714	0.0175367	0.033629	0.0270827	0.0734914
BCL2	3412-7	SL000104	Bcl-2	Apoptosis regulator Bcl-2	P10415	0.0167132	0.0346148	0.0187435	0.073759	0.021124	0.0593176	0.0167132	0.0346148
NAMPT	5011-11	SL003685	PBEF	Nicotinamide phosphoribosyltransferase	P43490	0.0294266	0.460115	0.0238217	0.0890509	0.0369632	0.0633972	0.0294266	0.460115
LAG3	5099-14	SL005195	LAG-3	Lymphocyte activation gene 3 protein	P18627	0.0221041	0.12113	0.0320679	0.0398904	0.0313904	0.034533	0.0221041	0.12113
PLA2G1B	4910-21	SL004064	GIB	Phospholipase A2	P04054	0.0317509	0.314035	0.0171201	0.046849	0.0258833	0.0320806	0.0317509	0.314035
CHGA	8476-11	SL002762	CgA	Chromogranin-A	P10645	0.0276587	0.0317182	0.0226627	0.0379962	0.0325857	0.0414528	0.0276587	0.0317182
GPNMB	5080-131	SL007429	GPNMB	Transmembrane glycoprotein NMB	Q14956	0.0264153	0.076995	0.0103568	0.0276397	0.0166492	0.0276185	0.0264153	0.076995
IL12RB1	2632-5	SL004148	IL-12 Rb1	Interleukin-12 receptor subunit beta-1	P42701	0.0252215	0.0297771	0.017638	0.0270764	0.0191658	0.0287445	0.0252215	0.0297771
CD63	9190-7	SL008837	CD63	CD63 antigen	P08962	0.0339569	0.0565957	0.0286934	0.0430113	0.0238231	0.0367293	0.0339569	0.0565957
EGF	5509-7	SL000084	EGF	Epidermal growth factor	P01133	0.0994207	0.115333	0.0931063	0.101298	0.115511	0.105715	0.0994207	0.115333
GP1BA	4990-87	SL006460	GP1BA	Platelet glycoprotein Ib alpha chain	P07359	0.0262402	0.0804528	0.0289878	0.0336009	0.0354364	0.0407243	0.0262402	0.0804528
PRLR	5114-65	SL005212	Prolactin Receptor	Prolactin receptor	P16471	0.0245596	0.498934	0.0252686	0.0354223	0.0161681	0.0279788	0.0245596	0.498934
ERBB3	2617-56	SL002519	ERBB3	Receptor tyrosine-protein kinase erbB-3	P21860	0.0371617	0.0568412	0.0381815	0.0398551	0.0317359	0.0461814	0.0371617	0.0568412
CLC	11094-104	SL007361	LPPL	Galectin-10	Q05315	0.0177354	0.0671445	0.0136384	0.041577	0.0294544	0.0379696	0.0177354	0.0671445
ESAM	2981-9	SL005160	ESAM	Endothelial cell-selective adhesion molecule	Q96AP7	0.0336428	0.0339053	0.0234118	0.0279538	0.0350147	0.0290135	0.0336428	0.0339053
STX1A	3766-51	SL004304	STX1a	Syntaxin-1A	Q16623	0.0348977	0.0601967	0.0182671	0.0365884	0.0195508	0.0404919	0.0348977	0.0601967
PRKCB	5475-10	SL000553	PKC-B-II	Protein kinase C beta type (splice variant beta-II)	P05771	0.0560174	0.205477	0.0237802	0.0532812	0.0260756	0.0346941	0.0560174	0.205477
SAA1	4336-2	SL000572	SAA	Serum amyloid A-1 protein	P0DJI8	0.0541417	0.0918314	0.0304039	0.0456595	0.0398605	0.05303	0.0541417	0.0918314
FRZB	2841-13	SL004650	sFRP-3	Secreted frizzled-related protein 3	Q92765	0.0208262	0.0791104	0.0176469	0.0335811	0.0284647	0.0422199	0.0208262	0.0791104
IFNGR1	5825-49	SL000458	IFN-g R1	Interferon gamma receptor 1	P15260	0.0198318	0.0514242	0.0161441	0.0269512	0.0311003	0.0288547	0.0198318	0.0514242
C4A C4B	4481-34	SL000316	C4	Complement C4	P0C0L4, P0C0L5	0.113467	0.137094	0.0655541	0.0818411	0.0712773	0.0890654	0.113467	0.137094
CTSZ	4971-1	SL008380	CATZ	Cathepsin Z	Q9UBR2	0.0177021	0.051811	0.0130255	0.0278577	0.027535	0.0296927	0.0177021	0.051811
CA10	3289-19	SL010449	Carbonic Anhydrase X	Carbonic anhydrase-related protein 10	Q9NS85	0.0295058	0.0654589	0.0263124	0.0414217	0.0356966	0.0344382	0.0295058	0.0654589
CD209	3029-52	SL005157	DC-SIGN	CD209 antigen	Q9NNX6	0.0162072	0.32833	0.0257146	0.0270505	0.0150784	0.0255988	0.0162072	0.32833
CLU	4542-24	SL001896	Clusterin	Clusterin	P10909	0.0976195	0.13142	0.0386319	0.0659028	0.0465633	0.0609985	0.0976195	0.13142
IL15RA	3445-53	SL004151	IL-15 Ra	Interleukin-15 receptor subunit alpha	Q13261	0.0236181	0.0389246	0.0204131	0.0362815	0.0302831	0.0354544	0.0236181	0.0389246
TNNI2	5440-26	SL004594	Troponin I, skeletal, fast twitch	Troponin I, fast skeletal muscle	P48788	0.0236214	0.087945	0.0141898	0.041167	0.0191635	0.0350719	0.0236214	0.087945
CDH5	2819-23	SL002081	Cadherin-5	Cadherin-5	P33151	0.0204677	0.047004	0.0124291	0.0249774	0.0249896	0.0361961	0.0204677	0.047004
CTSE	3594-6	SL007121	CATE	Cathepsin E	P14091	0.0172684	0.20753	0.0203895	0.0420072	0.0178939	0.0263948	0.0172684	0.20753
NRCAM	5109-24	SL005210	Nr-CAM	Neuronal cell adhesion molecule	Q92823	0.0523298	0.0562285	0.0291733	0.0526034	0.0360988	0.0418123	0.0523298	0.0562285
HAPLN1	3196-6	SL008023	HPLN1	Hyaluronan and proteoglycan link protein 1	P10915	0.0210703	0.051947	0.027757	0.0317523	0.0241502	0.0357983	0.0210703	0.051947
DCTPP1	4314-12	SL011809	XTP3A	dCTP pyrophosphatase 1	Q9H773	0.0231617	0.0606065	0.0207521	0.0318198	0.0250775	0.0335782	0.0231617	0.0606065
TNFRSF11B	2526-53	SL002539	OPG	Tumor necrosis factor receptor superfamily member 11B	O00300	0.0570486	0.170017	0.071071	0.0720512	0.0498831	0.053806	0.0570486	0.170017
BCL6	13111-79	SL007223	BCL6	B-cell lymphoma 6 protein	P41182	0.0204473	0.161529	0.0186528	0.039698	0.0122435	0.0452548	0.0204473	0.161529
JAG2	5093-47	SL007774	JAG2	Protein jagged-2	Q9Y219	0.0217255	0.452069	0.0324693	0.0317935	0.0211027	0.032637	0.0217255	0.452069
IGHA1 IGHA2	11089-7	SL000459	IgA	Immunoglobulin A	P01876 P01877	0.0632137	0.145991	0.020015	0.0796438	0.0509006	0.0563916	0.0632137	0.145991
FAM3B	9177-6	SL007306	FAM3B	Protein FAM3B	P58499	0.0235643	0.0426169	0.0195714	0.0435986	0.030166	0.0489543	0.0235643	0.0426169
PTEN	3831-21	SL003761	pTEN	Phosphatidylinositol 3,4,5-trisphosphate 3-phosphatase and dual-specificity protein phosphatase PTEN	P60484	0.0212048	0.095177	0.0241681	0.0371734	0.0219434	0.037778	0.0212048	0.095177
FCN1	3613-62	SL010462	FCN1	Ficolin-1	O00602	0.0281857	0.0450676	0.0261192	0.030736	0.0336986	0.0412391	0.0281857	0.0450676
DSCAM	9175-48	SL018891	DSCAM	Down syndrome cell adhesion molecule	O60469	0.0175317	0.0371392	0.00952009	0.0346849	0.017835	0.024429	0.0175317	0.0371392
FCGR2A	3309-2	SL010459	FCG2A	Low affinity immunoglobulin gamma Fc region receptor II-a	P12318	0.0378004	0.181736	0.0627892	0.0602254	0.0326842	0.0506387	0.0378004	0.181736
FETUB	3367-8	SL006777	FETUB	Fetuin-B	Q9UGM5	0.0384769	0.232904	0.0223114	0.0826063	0.0197277	0.227148	0.0384769	0.232904
NEGR1	13109-82	SL008810	NEGR1	Neuronal growth regulator 1	Q7Z3B1	0.0397269	0.0375716	0.0346784	0.049817	0.0523355	0.050022	0.0397269	0.0375716
SERPINA5	3389-7	SL000550	PCI	Plasma serine protease inhibitor	P05154	0.0644948	0.0765496	0.0687191	0.10495	0.0439056	0.0756274	0.0644948	0.0765496
SERPINA3	4153-11	SL018548	alpha-1-antichymotrypsin complex	Alpha-1-antichymotrypsin complex	P01011	0.0379797	0.0912948	0.0310695	0.0426467	0.0321505	0.0378067	0.0379797	0.0912948
CCL23	3028-36	SL003301	Ck-b-8-1	Ck-beta-8-1	P55773	0.0461098	0.0597735	0.0306869	0.0395549	0.0374165	0.0360603	0.0461098	0.0597735
SPINT1	2828-82	SL004645	HAI-1	Kunitz-type protease inhibitor 1	O43278	0.0305544	0.0543708	0.0163621	0.0411144	0.0186001	0.0311042	0.0305544	0.0543708
ADCYAP1	8450-36	SL011498	PACAP-38	Pituitary adenylate cyclase-activating polypeptide 38	P18509	0.0354584	0.138305	0.0354488	0.0990096	0.0266055	0.11032	0.0354584	0.138305
ERBB2	2616-23	SL000009	ERBB2	Receptor tyrosine-protein kinase erbB-2	P04626	0.0275301	0.303828	0.0214551	0.0350108	0.0178391	0.047932	0.0275301	0.303828
IL17RB	5084-154	SL005174	IL-17B R	Interleukin-17 receptor B	Q9NRM6	0.0250823	0.105821	0.0179759	0.0423645	0.0199954	0.0476444	0.0250823	0.105821
PRSS3	3479-71	SL006480	TRY3	Trypsin-3	P35030	0.0183478	0.073354	0.0144697	0.0232895	0.0132907	0.026337	0.0183478	0.073354
TNFRSF6B	5070-76	SL003739	DcR3	Tumor necrosis factor receptor superfamily member 6B	O95407	0.019329	0.122711	0.0229151	0.0382912	0.0100017	0.0348081	0.019329	0.122711
RNASEH1	8470-213	SL017528	RNase H1	Ribonuclease H1	O60930	0.0316603	0.214868	0.0467474	0.112241	0.0376169	0.069551	0.0316603	0.214868
TFF1	9185-15	SL008591	TFF1	Trefoil factor 1	P04155	0.0192754	0.291851	0.0130612	0.0334563	0.0274894	0.0395389	0.0192754	0.291851
MRC1	2637-77	SL004579	Macrophage mannose receptor	Macrophage mannose receptor 1	P22897	0.0663936	0.0553407	0.0557081	0.0781995	0.0614543	0.0975361	0.0663936	0.0553407
C3	2754-50	SL000312	C3	Complement C3	P01024	0.232094	0.311463	0.116273	0.231997	0.215621	0.1483	0.232094	0.311463
AMICA1	5094-62	SL009202	JAML1	Junctional adhesion molecule-like	Q86YT9	0.0255494	0.137085	0.035444	0.0434769	0.0210866	0.0381871	0.0255494	0.137085
FGFR4	4988-49	SL002036	FGFR4	Fibroblast growth factor receptor 4	P22455	0.0140547	0.408706	0.0248084	0.0370087	0.0253879	0.0407102	0.0140547	0.408706
FYN	3813-3	SL006913	FYN	Tyrosine-protein kinase Fyn	P06241	0.0161845	0.0994326	0.0217342	0.0401662	0.0212955	0.0321538	0.0161845	0.0994326
EFNB2	14131-37	SL007274	EFNB2	Ephrin-B2	P52799	0.0283386	0.097082	0.0210877	0.0354761	0.0284394	0.0460065	0.0283386	0.097082
PAK6	3827-22	SL010509	PAK6	Serine/threonine-protein kinase PAK 6	Q9NQU5	0.0542175	0.246386	0.0332205	0.0722319	0.0488459	0.0556702	0.0542175	0.246386
MMP16	5268-49	SL003331	MMP-16	Matrix metalloproteinase-16	P51512	0.0216628	0.0312329	0.0119452	0.0344679	0.0174923	0.0373081	0.0216628	0.0312329
SEMA3A	3222-11	SL010379	Semaphorin 3A	Semaphorin-3A	Q14563	0.0373648	0.0486141	0.0260986	0.0463538	0.0311201	0.0559343	0.0373648	0.0486141
DPT	4979-34	SL008178	DERM	Dermatopontin	Q07507	0.0217752	0.0366959	0.0275443	0.0430827	0.0623865	0.0580116	0.0217752	0.0366959
UBE2L3	3874-8	SL008157	UB2L3	Ubiquitin-conjugating enzyme E2 L3	P68036	0.0234822	0.0454079	0.0314965	0.0436116	0.0229857	0.0329889	0.0234822	0.0454079
MATK	3823-9	SL010505	MATK	Megakaryocyte-associated tyrosine-protein kinase	P42679	0.0176791	0.365062	0.020637	0.0591324	0.0245383	0.0736071	0.0176791	0.365062
ICAM3	2649-77	SL003178	sICAM-3	Intercellular adhesion molecule 3	P32942	0.0260297	0.996465	0.0162952	0.0414727	0.0186023	0.0358342	0.0260297	0.996465
COL8A1	4807-13	SL008072	CO8A1	Collagen alpha-1(VIII) chain	P27658	0.0191342	0.577157	0.0157857	0.0411709	0.023691	0.0432562	0.0191342	0.577157
LUM	13114-50	SL006230	Lumican	Lumican	P51884	0.0362895	0.139683	0.0441061	0.0543442	0.0233101	0.0277591	0.0362895	0.139683
FGF23	3807-1	SL007651	FGF23	Fibroblast growth factor 23	Q9GZV9	0.0336999	0.0896444	0.0344852	0.0492167	0.0218921	0.0533413	0.0336999	0.0896444
CD274	5060-62	SL004852	B7-H1	Programmed cell death 1 ligand 1	Q9NZQ7	0.0239958	0.0576203	0.0203958	0.0425745	0.0315532	0.0433532	0.0239958	0.0576203
PRKAA2 PRKAB2 PRKAG1	5245-40	SL016549	AMPK a2b2g1	AMP Kinase (alpha2beta2gamma1)	P54646 O43741 P54619	0.0140886	0.0711236	0.0139252	0.0374202	0.0179736	0.0566553	0.0140886	0.0711236
PPY	4588-1	SL011499	PH	Pancreatic hormone	P01298	0.0215298	0.153922	0.0250883	0.0303919	0.0248017	0.0437801	0.0215298	0.153922
LEPR	5400-52	SL003184	sLeptin R	Leptin receptor	P48357	0.0168934	0.0527823	0.0140393	0.0247171	0.0155316	0.0244405	0.0168934	0.0527823
AGR2	4959-2	SL004925	AGR2	Anterior gradient protein 2 homolog	O95994	0.0209145	0.0737648	0.0222573	0.0366711	0.0341362	0.0453993	0.0209145	0.0737648
SST	5957-30	SL011510	Somatostatin-28	Somatostatin-28	P61278	0.0304079	0.0340149	0.0268344	0.0535709	0.0297877	0.0451803	0.0304079	0.0340149
GDF11	12060-28	SL004345	GDF-11	Growth/differentiation factor 11	O95390	0.0273868	0.0686888	0.0267771	0.0423478	0.0219815	0.0390034	0.0273868	0.0686888
CCL18	3044-3	SL003323	PARC	C-C motif chemokine 18	P55774	0.0444804	0.0485392	0.0227835	0.0628519	0.0321509	0.061353	0.0444804	0.0485392
IL12A IL12B	10367-62	SL001716	IL-12	Interleukin-12	P29459, P29460	0.0230819	0.137651	0.0127813	0.0360978	0.0253374	0.0280569	0.0230819	0.137651
GRP	5897-58	SL002071	Gastrin-releasing peptide	Gastrin-releasing peptide	P07492	0.0240555	0.074702	0.0280055	0.0383317	0.0205141	0.0358559	0.0240555	0.074702
RGMA	5483-1	SL010467	RGMA	Repulsive guidance molecule A	Q96B86	0.0287329	0.0376084	0.0350244	0.0450817	0.0337147	0.0318025	0.0287329	0.0376084
F10	3077-66	SL003324	Coagulation Factor Xa	Coagulation factor Xa	P00742	0.0613404	0.0401871	0.0378994	0.128989	0.0464818	0.0799322	0.0613404	0.0401871
SPARCL1	4467-49	SL005488	SPARCL1	SPARC-like protein 1	Q14515	0.0275554	0.0666334	0.0243808	0.0350618	0.0205162	0.0256407	0.0275554	0.0666334
STK16	3471-49	SL010517	STK16	Serine/threonine-protein kinase 16	O75716	0.0338306	0.151496	0.0333189	0.0503436	0.028986	0.0450559	0.0338306	0.151496
GFRA2	2515-14	SL004143	GFRa-2	GDNF family receptor alpha-2	O00451	0.0189813	0.0606044	0.0178515	0.0317413	0.0159484	0.0242346	0.0189813	0.0606044
SPOCK1	5490-53	SL010384	Testican-1	Testican-1	Q08629	0.0290554	0.0346172	0.0367052	0.0287684	0.0468029	0.0420815	0.0290554	0.0346172
NUDCD3	4254-6	SL011768	NUDC3	NudC domain-containing protein 3	Q8IVD9	0.0220691	0.0627116	0.0234882	0.0452918	0.019274	0.0339224	0.0220691	0.0627116
DDX19B	5460-60	SL004750	DEAD-box protein 19B	ATP-dependent RNA helicase DDX19B	Q9UMR2	0.0164366	0.0347563	0.0193412	0.0489342	0.0313914	0.0464127	0.0164366	0.0347563
LIFR	5837-49	SL004714	LIF sR	Leukemia inhibitory factor receptor	P42702	0.0246814	0.097116	0.026232	0.0425119	0.0393121	0.036565	0.0246814	0.097116
PCSK9	5231-79	SL012707	PCSK9	Proprotein convertase subtilisin/kexin type 9	Q8NBP7	0.089701	0.186498	0.0243339	0.0607175	0.0360318	0.0526281	0.089701	0.186498
PI3	4982-54	SL004458	Elafin	Elafin	P19957	0.0173648	0.0349256	0.0139344	0.0357735	0.034475	0.0496073	0.0173648	0.0349256
SNRPF	5494-52	SL009790	RUXF	Small nuclear ribonucleoprotein F	P62306	0.026743	0.0329309	0.0217134	0.0307985	0.0231869	0.0320049	0.026743	0.0329309
LILRB2	5091-28	SL005191	ILT-4	Leukocyte immunoglobulin-like receptor subfamily B member 2	Q8N423	0.0198718	0.0332728	0.0131488	0.0232618	0.0157279	0.0201882	0.0198718	0.0332728
CCL3	3040-59	SL000519	MIP-1a	C-C motif chemokine 3	P10147	0.030682	0.045654	0.0348638	0.0495982	0.035228	0.0454875	0.030682	0.045654
MPL	3473-78	SL005224	Thrombopoietin Receptor	Thrombopoietin Receptor	P40238	0.0341067	0.107562	0.0265334	0.0532038	0.0260656	0.0451055	0.0341067	0.107562
BIRC7	4561-65	SL004299	Livin B	Baculoviral IAP repeat-containing protein 7 Isoform beta	Q96CA5	0.0348285	0.0610917	0.0260162	0.043792	0.0306924	0.0698438	0.0348285	0.0610917
LRIG3	3322-52	SL010464	LRIG3	Leucine-rich repeats and immunoglobulin-like domains protein 3	Q6UXM1	0.0265256	0.0435852	0.034825	0.0394503	0.02253	0.0300939	0.0265256	0.0435852
MBD4	3891-56	SL009629	MBD4	Methyl-CpG-binding domain protein 4	O95243	0.0121678	0.0572503	0.0206175	0.0710495	0.0109625	0.088495	0.0121678	0.0572503
IL1A	4851-25	SL000125	IL-1a	Interleukin-1 alpha	P01583	0.014181	0.183001	0.0159968	0.0260973	0.0102659	0.0301826	0.014181	0.183001
ENTPD3	4436-1	SL014093	ENTP3	Ectonucleoside triphosphate diphosphohydrolase 3	O75355	0.0284441	0.0444329	0.0183843	0.0326754	0.0275282	0.0352065	0.0284441	0.0444329
HIF1A	13089-6	SL003349	HIF-1a	Hypoxia-inducible factor 1-alpha	Q16665	0.0243763	0.26892	0.0167544	0.0322698	0.0166381	0.0354865	0.0243763	0.26892
ADAMTS13	3175-51	SL006610	ATS13	A disintegrin and metalloproteinase with thrombospondin motifs 13	Q76LX8	0.0284358	0.0640281	0.0345575	0.0433586	0.0285795	0.030322	0.0284358	0.0640281
SELP	4154-57	SL000560	P-Selectin	P-selectin	P16109	0.0214054	0.0578238	0.0196352	0.0375536	0.0577112	0.0666994	0.0214054	0.0578238
FGF12	4392-54	SL005161	FGF-12	Fibroblast growth factor 12	P61328	0.041514	0.0744891	0.0292115	0.0371343	0.0336444	0.0504067	0.041514	0.0744891
REN	3396-54	SL000565	Renin	Renin	P00797	0.0163723	0.133323	0.0136596	0.0265681	0.0184016	0.025178	0.0163723	0.133323
CCL15	3509-1	SL003190	MIP-5	C-C motif chemokine 15	Q16663	0.0363745	0.132329	0.0354386	0.0600954	0.0331897	0.0309557	0.0363745	0.132329
TNFRSF17	2665-26	SL004672	BCMA	Tumor necrosis factor receptor superfamily member 17	Q02223	0.0224153	0.0643671	0.0255358	0.0383288	0.0272046	0.0300551	0.0224153	0.0643671
TNFRSF14	5352-11	SL004145	HVEM	Tumor necrosis factor receptor superfamily member 14	Q92956	0.0191756	0.241549	0.0191393	0.0345279	0.0282197	0.037852	0.0191756	0.241549
TNFRSF10B	5534-49	SL004157	TRAIL R2	Tumor necrosis factor receptor superfamily member 10B	O14763	0.0207419	0.0759433	0.0190405	0.0296171	0.0201482	0.0263269	0.0207419	0.0759433
SEMA5A	13132-14	SL008522	SEM5A	Semaphorin-5A	Q13591	0.0226001	0.105522	0.0181579	0.0372425	0.0339561	0.0392646	0.0226001	0.105522
CXCL6	3495-15	SL003172	GCP-2	C-X-C motif chemokine 6	P80162	0.0372723	0.176142	0.0317842	0.055019	0.033067	0.0393161	0.0372723	0.176142
IL12B IL23A	10365-132	SL005184	IL-23	Interleukin-23	P29460, Q9NPF7	0.021125	0.0488454	0.0205823	0.0651084	0.0231295	0.0419774	0.021125	0.0488454
LPO	4801-13	SL007153	PERL	Lactoperoxidase	P22079	0.0224918	0.819358	0.0172819	0.0346472	0.0215491	0.0766077	0.0224918	0.819358
KLK14	3681-87	SL003919	kallikrein 14	Kallikrein-14	Q9P0G3	0.0618117	0.0882906	0.0375919	0.0485949	0.0574232	0.0701377	0.0618117	0.0882906
HSPA1A	4124-24	SL000451	HSP 70	Heat shock 70 kDa protein 1A	P0DMV8	0.0193785	0.0505591	0.0243153	0.0403291	0.0188099	0.0293656	0.0193785	0.0505591
CCL27	2192-63	SL003168	CTACK	C-C motif chemokine 27	Q9Y4X3	0.0247798	0.0940565	0.0466304	0.0419047	0.0310498	0.0312716	0.0247798	0.0940565
ADAMTS15	4533-76	SL012740	ATS15	A disintegrin and metalloproteinase with thrombospondin motifs 15	Q8TE58	0.0317161	0.0723383	0.0151313	0.0343878	0.016866	0.037729	0.0317161	0.0723383
ITGA2B ITGB3	8488-33	SL000542	gpIIbIIIa	Integrin alpha-IIb: beta-3 complex	P08514 P05106	0.0190556	0.0489631	0.0144956	0.0334309	0.0110685	0.0338207	0.0190556	0.0489631
EFNA3	14153-8	SL004139	Ephrin-A3	Ephrin-A3	P52797	0.026292	0.11695	0.0137571	0.0383835	0.0261548	0.0438561	0.026292	0.11695
NTRK2	4866-59	SL004160	TrkB	BDNF/NT-3 growth factors receptor	Q16620	0.0198871	0.0497316	0.0271824	0.0365179	0.0138865	0.020254	0.0198871	0.0497316
GAPDH	3848-14	SL003785	GAPDH, liver	Glyceraldehyde-3-phosphate dehydrogenase	P04406	0.0329432	0.0617075	0.029582	0.0832039	0.0196473	0.0480321	0.0329432	0.0617075
PPP3CA PPP3R1	4903-72	SL003657	Calcineurin	Calcineurin	Q08209 P63098	0.028229	0.121327	0.0374694	0.0667703	0.0320564	0.0444436	0.028229	0.121327
ADAMTS1	3174-2	SL008421	ATS1	A disintegrin and metalloproteinase with thrombospondin motifs 1	Q9UHI8	0.0329562	0.073499	0.0283204	0.039994	0.0264514	0.0393546	0.0329562	0.073499
CD177	13116-25	SL008931	CD177	CD177 antigen	Q8N6Q3	0.0204681	0.0274157	0.0223662	0.0328761	0.0223654	0.0340803	0.0204681	0.0274157
IL13	3072-4	SL001718	IL-13	Interleukin-13	P35225	0.0209476	0.114776	0.020731	0.0441378	0.0200535	0.0353815	0.0209476	0.114776
PRSS1	3049-61	SL000603	Trypsin	Trypsin-1	P07477	0.0134203	0.110437	0.0230309	0.0272477	0.0184227	0.0258394	0.0134203	0.110437
PSME1	5918-5	SL008176	PSME1	Proteasome activator complex subunit 1	Q06323	0.0307217	0.0609454	0.0305641	0.0478557	0.0450202	0.0431535	0.0307217	0.0609454
CPB2	3518-54	SL004015	TAFI	Carboxypeptidase B2	Q96IY4	0.0315978	0.0738684	0.0117002	0.0671823	0.025485	0.0515393	0.0315978	0.0738684
PLA2G5	2449-1	SL004182	GV	Calcium-dependent phospholipase A2	P39877	0.0318603	0.0498101	0.0195613	0.0335392	0.0279866	0.0257691	0.0318603	0.0498101
ADAM12	4420-7	SL009988	ADAM12	Disintegrin and metalloproteinase domain-containing protein 12	O43184	0.0126725	0.0332627	0.0200332	0.0795625	0.0142043	0.0734849	0.0126725	0.0332627
CFP	2960-66	SL003192	Properdin	Properdin	P27918	0.0664804	0.114552	0.0727624	0.102959	0.058178	0.0925739	0.0664804	0.114552
SYNCRIP	4224-7	SL007022	HNRPQ	Heterogeneous nuclear ribonucleoprotein Q	O60506	0.0453392	0.0805087	0.017345	0.048211	0.0427296	0.0423317	0.0453392	0.0805087
MAPK12	5005-4	SL007281	MK12	Mitogen-activated protein kinase 12	P53778	0.0231329	0.042861	0.0204463	0.0262484	0.0258411	0.0360547	0.0231329	0.042861
FGF10	2441-2	SL004333	FGF-10	Fibroblast growth factor 10	O15520	0.0370359	0.431775	0.0308288	0.0487095	0.0238818	0.0446682	0.0370359	0.431775
NOV	2737-22	SL005236	NovH	Protein NOV homolog	P48745	0.0195326	0.0547583	0.0138406	0.0278548	0.020389	0.0360162	0.0195326	0.0547583
GPD1	11081-1	SL007151	GPDA	Glycerol-3-phosphate dehydrogenase [NAD(+)], cytoplasmic	P21695	0.0305763	0.0623512	0.0310023	0.0455128	0.0490746	0.0780411	0.0305763	0.0623512
IL6R	4139-71	SL001943	IL-6 sRa	Interleukin-6 receptor subunit alpha	P08887	0.0246177	0.134101	0.0408576	0.0539634	0.0319558	0.0439506	0.0246177	0.134101
RB1	5024-67	SL002522	Rb	Retinoblastoma-associated protein	P06400	0.0227208	0.0345582	0.028368	0.0413323	0.034269	0.0499898	0.0227208	0.0345582
CCL2	2578-67	SL000038	MCP-1	C-C motif chemokine 2	P13500	0.0267452	0.057525	0.0248642	0.0517549	0.0194559	0.0476692	0.0267452	0.057525
HIST2H2BE	14143-8	SL014983	H2B2E	Histone H2B type 2-E	Q16778	0.0418192	0.078043	0.047614	0.0603303	0.0492742	0.0668396	0.0418192	0.078043
KIRREL3	4557-61	SL014111	KIRR3	Kin of IRRE-like protein 3	Q8IZU9	0.0325897	0.0485154	0.0114028	0.0333085	0.0253713	0.0309535	0.0325897	0.0485154
COL18A1	2201-17	SL000403	Endostatin	Endostatin	P39060	0.050859	0.0475838	0.0505466	0.0662696	0.0321351	0.0577373	0.050859	0.0475838
KLK13	3200-49	SL003918	kallikrein 13	Kallikrein-13	Q9UKR3	0.0248743	0.0313198	0.00891517	0.0319809	0.0140081	0.0300505	0.0248743	0.0313198
TGFB2	4156-74	SL000088	TGF-b2	Transforming growth factor beta-2	P61812	0.0225877	0.188576	0.0154438	0.06059	0.0246001	0.0498242	0.0225877	0.188576
C5 C6	4482-66	SL000321	C5b, 6 Complex	Complement C5b-C6 complex	P01031,P13671	0.0677707	0.103045	0.0351533	0.0853341	0.0455502	0.108054	0.0677707	0.103045
IL18RAP	2993-1	SL004861	IL-18 Rb	Interleukin-18 receptor accessory protein	O95256	0.0300687	0.0432705	0.0196955	0.0288677	0.0229552	0.0403141	0.0300687	0.0432705
PRSS22	4534-10	SL012822	BSSP4	Brain-specific serine protease 4	Q9GZN4	0.0116879	0.0604302	0.0124853	0.0313325	0.0283527	0.0489715	0.0116879	0.0604302
FGF2	3025-50	SL000004	bFGF	Fibroblast growth factor 2	P09038	0.0259681	0.162279	0.0161243	0.0428485	0.0248907	0.0375343	0.0259681	0.162279
PDPK1	4460-8	SL006998	PDPK1	3-phosphoinositide-dependent protein kinase 1	O15530	0.0305298	0.172857	0.0138418	0.0785929	0.0186924	0.0752857	0.0305298	0.172857
EPB41	4706-17	SL010830	41	Protein 4.1	P11171	0.15509	0.152907	0.0579811	0.208692	0.0568935	0.103799	0.15509	0.152907
KLK8	2834-54	SL003915	kallikrein 8	Kallikrein-8	O60259	0.0268981	0.0976912	0.0228953	0.0286961	0.0344554	0.0346152	0.0268981	0.0976912
EDA2R	3083-71	SL005233	XEDAR	Tumor necrosis factor receptor superfamily member 27	Q9HAV5	0.0137332	0.0768933	0.0210747	0.0375409	0.0243641	0.0319461	0.0137332	0.0768933
RAD51	2871-73	SL006922	RAD51	DNA repair protein RAD51 homolog 1	Q06609	0.0390611	0.109716	0.0484569	0.0617496	0.0523436	0.0472829	0.0390611	0.109716
LRRK2	10990-21	SL017128	LRRK2	Leucine-rich repeat serine/threonine-protein kinase 2	Q5S007	0.0394208	0.0618177	0.0254269	0.0339846	0.0482966	0.0422625	0.0394208	0.0618177
WNK3	5493-17	SL010524	WNK3	Serine/threonine-protein kinase WNK3	Q9BYP7	0.0342655	0.0649709	0.0226606	0.0470938	0.0202757	0.0270681	0.0342655	0.0649709
PTPN1	3005-5	SL004939	PTP-1B	Tyrosine-protein phosphatase non-receptor type 1	P18031	0.042747	0.0867255	0.0300301	0.0461452	0.0300277	0.05571	0.042747	0.0867255
THPO	5947-90	SL000598	Tpo	Thrombopoietin	P40225	0.027018	0.100434	0.0165843	0.0267962	0.0187307	0.0510457	0.027018	0.100434
PLXNC1	4564-2	SL006406	PLXC1	Plexin-C1	O60486	0.0286812	0.0566803	0.0173293	0.0253807	0.0314593	0.0239175	0.0286812	0.0566803
PIANP	14114-18	SL019019	PIANP	PILR alpha-associated neural protein	Q8IYJ0	0.0187414	0.0945552	0.0171709	0.0395296	0.0271371	0.026987	0.0187414	0.0945552
FLRT3	13123-3	SL008372	FLRT3	Leucine-rich repeat transmembrane protein FLRT3	Q9NZU0	0.0251165	0.0954556	0.0234578	0.0401657	0.0219288	0.0528916	0.0251165	0.0954556
PRL	2585-2	SL000546	PRL	Prolactin	P01236	0.0279326	0.155207	0.0205794	0.0482558	0.0377728	0.0905204	0.0279326	0.155207
CD80	2603-61	SL003738	B7	T-lymphocyte activation antigen CD80	P33681	0.0214183	0.0830806	0.0239705	0.0302303	0.0203987	0.0321292	0.0214183	0.0830806
CAMK1	3592-4	SL010489	CAMK1	Calcium/calmodulin-dependent protein kinase type 1	Q14012	0.0295939	0.0929078	0.036316	0.0489294	0.0515568	0.0442196	0.0295939	0.0929078
RASA1	5481-16	SL013754	RASA1	Ras GTPase-activating protein 1	P20936	0.0634635	0.224893	0.0414048	0.0822815	0.0527797	0.0527717	0.0634635	0.224893
TLR2	3835-11	SL004492	TLR2	Toll-like receptor 2	O60603	0.0208102	0.039063	0.0223389	0.0402316	0.0321246	0.030266	0.0208102	0.039063
IGFBP3	2571-12	SL000045	IGFBP-3	Insulin-like growth factor-binding protein 3	P17936	0.0865514	0.112603	0.0218322	0.0679935	0.0653315	0.078679	0.0865514	0.112603
EDA	2826-53	SL004644	EDA	Ectodysplasin-A, secreted form	Q92838	0.0160286	0.0475634	0.0233362	0.0283147	0.0227133	0.0323408	0.0160286	0.0475634
EFEMP1	8480-29	SL006527	FBLN3	EGF-containing fibulin-like extracellular matrix protein 1	Q12805	0.0866216	0.0742526	0.0227956	0.0858166	0.0478376	0.0567737	0.0866216	0.0742526
KEAP1	8485-7	SL017529	KEAP1	Kelch-like ECH-associated protein 1	Q14145	0.0412776	0.151278	0.0258522	0.0526816	0.0441272	0.0539114	0.0412776	0.151278
VCAM1	2967-8	SL001720	VCAM-1	Vascular cell adhesion protein 1	P19320	0.0180556	0.103735	0.0361637	0.0310717	0.0248653	0.0263929	0.0180556	0.103735
IL16	2774-10	SL000474	IL-16	Interleukin-16	Q14005	0.0222133	0.0747608	0.0276421	0.0350898	0.0307989	0.0438436	0.0222133	0.0747608
FGF20	2763-66	SL004338	FGF-20	Fibroblast growth factor 20	Q9NP95	0.0225701	0.054185	0.0162049	0.0328638	0.0222606	0.0379906	0.0225701	0.054185
PLK1	3394-81	SL005258	PLK-1	Serine/threonine-protein kinase PLK1	P53350	0.0404947	0.0781041	0.0171124	0.0491578	0.020793	0.0394161	0.0404947	0.0781041
MST1R	2640-3	SL004637	MSP R	Macrophage-stimulating protein receptor	Q04912	0.0228558	0.0592122	0.0193159	0.0378367	0.0270529	0.0355196	0.0228558	0.0592122
MAP2K3	6151-18	SL007242	MP2K3	Dual specificity mitogen-activated protein kinase kinase 3	P46734	0.0354501	0.230412	0.0495074	0.0664323	0.0432553	0.0536351	0.0354501	0.230412
MCL1	10358-33	SL003755	Mcl-1	Induced myeloid leukemia cell differentiation protein Mcl-1	Q07820	0.019327	0.258874	0.0133838	0.038079	0.0181961	0.0363748	0.019327	0.258874
PAPPA	4148-49	SL002755	PAPP-A	Pappalysin-1	Q13219	0.0172441	0.167796	0.0154432	0.0266144	0.0223146	0.0333446	0.0172441	0.167796
IL9	5834-18	SL000485	IL-9	Interleukin-9	P15248	0.0239121	0.219435	0.0155283	0.0384878	0.0203675	0.0545454	0.0239121	0.219435
CSNK2A1	3427-63	SL007324	CSK21	Casein kinase II subunit alpha	P68400	0.0176805	0.174472	0.0154777	0.0423624	0.0253236	0.0445727	0.0176805	0.174472
MIA	2687-2	SL001947	MIA	Melanoma-derived growth regulatory protein	Q16674	0.0180771	0.0682468	0.0166204	0.0260434	0.0116367	0.0200385	0.0180771	0.0682468
CST6	3303-23	SL004438	Cystatin M	Cystatin-M	Q15828	0.0166359	0.0684803	0.0191247	0.0304088	0.0214488	0.0272514	0.0166359	0.0684803
MICA	2730-58	SL005199	MICA	MHC class I polypeptide-related sequence A	Q29983	0.0277255	0.104652	0.0308218	0.0379593	0.0336046	0.0194909	0.0277255	0.104652
C9	3060-43	SL000325	C9	Complement component C9	P02748	0.0787854	0.0858991	0.0287463	0.0679565	0.0466234	0.0776877	0.0787854	0.0858991
DNAJB1	3852-19	SL000449	HSP 40	DnaJ homolog subfamily B member 1	P25685	0.0348216	0.0808813	0.0267411	0.0648329	0.0312726	0.0423486	0.0348216	0.0808813
C1QA C1QB C1QC	2753-2	SL000309	C1q	Complement C1q subcomponent	P02745 P02746 P02747	0.082977	0.269413	0.197489	0.135178	0.111908	0.108878	0.082977	0.269413
BMP6	8459-10	SL003993	BMP-6	Bone morphogenetic protein 6	P22004	0.043713	0.101105	0.0411346	0.0580134	0.0530892	0.0393982	0.043713	0.101105
GDF2	4880-21	SL007756	GDF2	Growth/differentiation factor 2	Q9UK05	0.0282511	0.102441	0.0266335	0.037838	0.0427609	0.0581438	0.0282511	0.102441
FLRT2	13122-19	SL008360	FLRT2	Leucine-rich repeat transmembrane protein FLRT2	O43155	0.0234983	0.0348368	0.0321912	0.0463928	0.0389462	0.0355549	0.0234983	0.0348368
IGF1	2952-75	SL000047	IGF-I	Insulin-like growth factor I	P05019	0.0590635	0.140198	0.0362978	0.0512997	0.0646052	0.0507145	0.0590635	0.140198
MFGE8	4455-89	SL006523	MFGM	Lactadherin	Q08431	0.0331339	0.0787797	0.0362559	0.0440012	0.0278898	0.0388782	0.0331339	0.0787797
CD226	5062-60	SL011100	CD226	CD226 antigen	Q15762	0.0329981	0.045405	0.0275291	0.0365268	0.02599	0.0341717	0.0329981	0.045405
GH1	8462-18	SL000442	HGH	Somatotropin	P01241	0.0254378	0.375615	0.0149587	0.0365838	0.0163713	0.0351514	0.0254378	0.375615
LTBR	2636-10	SL000509	Lymphotoxin b R	Tumor necrosis factor receptor superfamily member 3	P36941	0.0420263	0.11501	0.0445428	0.0539524	0.046794	0.0455867	0.0420263	0.11501
MMP13	4925-54	SL000523	MMP-13	Collagenase 3	P45452	0.0269422	0.130047	0.0205783	0.0426159	0.0210241	0.0291224	0.0269422	0.130047
ATP5B	4965-27	SL005675	ATP synthase beta chain	ATP synthase subunit beta, mitochondrial	P06576	0.0381287	0.0905729	0.0319283	0.0690437	0.0341628	0.0648324	0.0381287	0.0905729
GDF11 MSTN	2765-4	SL021043	GDF-11/8	Growth/differentiation factor 11/8	O95390 O14793	0.0338979	0.170669	0.0232777	0.0340328	0.0357447	0.0389589	0.0338979	0.170669
EFNA4	2614-28	SL004140	Ephrin-A4	Ephrin-A4	P52798	0.0335627	0.0239979	0.0185152	0.0373938	0.0383743	0.0612871	0.0335627	0.0239979
IL1R2	14133-93	SL000145	IL-1 sRII	Interleukin-1 receptor type 2	P27930	0.0156101	0.031865	0.0176849	0.026732	0.0217874	0.0252626	0.0156101	0.031865
MEPE	3209-69	SL005437	MEPE	Matrix extracellular phosphoglycoprotein	Q9NQ76	0.0136557	0.0869254	0.0267387	0.0278515	0.0214459	0.0301068	0.0136557	0.0869254
NTN1	6649-51	SL012395	NET1	Netrin-1	O95631	0.0245133	0.0982111	0.030047	0.040232	0.0188857	0.0364065	0.0245133	0.0982111
LGALS3	3066-12	SL003744	Galectin-3	Galectin-3	P17931	0.0375928	0.0680869	0.043272	0.0605544	0.115371	0.0890248	0.0375928	0.0680869
SPHK2	4468-21	SL014029	SPHK2	Sphingosine kinase 2	Q9NRA0	0.0141773	0.0389955	0.0208465	0.035007	0.0213791	0.0453951	0.0141773	0.0389955
IL20	4138-25	SL004346	IL-20	Interleukin-20	Q9NYY1	0.0216417	0.0365311	0.0111514	0.0464748	0.0213701	0.0478337	0.0216417	0.0365311
MDH1	3853-56	SL008102	MDHC	Malate dehydrogenase, cytoplasmic	P40925	0.0261054	0.0602837	0.0166764	0.0314198	0.0246238	0.02756	0.0261054	0.0602837
BIRC3	4973-18	SL003728	cIAP-2	Baculoviral IAP repeat-containing protein 3	Q13489	0.0299918	0.0968745	0.0245697	0.0467545	0.0209287	0.0390525	0.0299918	0.0968745
PES1	4267-81	SL011772	PESC	Pescadillo homolog	O00541	0.0224648	0.232586	0.0226632	0.0464192	0.0259496	0.0671148	0.0224648	0.232586
KIT	2475-1	SL004010	SCF sR	Mast/stem cell growth factor receptor Kit	P10721	0.0431372	0.145188	0.0622916	0.0597785	0.0427668	0.0546855	0.0431372	0.145188
PDE3A	5254-69	SL016553	PDE3A	cGMP-inhibited 3',5'-cyclic phosphodiesterase A	Q14432	0.0193754	0.0573626	0.0167021	0.0290942	0.0209683	0.0317697	0.0193754	0.0573626
RPS27A	4474-19	SL004070	Ubiquitin	Ubiquitin	P62979	0.106244	0.144554	0.116181	0.164598	0.216852	0.143875	0.106244	0.144554
ARSA	3583-54	SL005392	Arylsulfatase A	Arylsulfatase A	P15289	0.0470252	0.1043	0.0357377	0.065966	0.0309481	0.0422919	0.0470252	0.1043
CCDC80	3234-23	SL010390	URB	Coiled-coil domain-containing protein 80	Q76M96	0.022414	0.0870919	0.0311957	0.0334374	0.0200961	0.0236131	0.022414	0.0870919
SEZ6L2	3867-49	SL011630	SE6L2	Seizure 6-like protein 2	Q6UXD5	0.0186351	0.13869	0.0188337	0.056934	0.0160122	0.0622722	0.0186351	0.13869
RPS6KA3	3469-74	SL010515	RPS6KA3	Ribosomal protein S6 kinase alpha-3	P51812	0.0219056	0.0781247	0.0199131	0.0716358	0.0215621	0.0596317	0.0219056	0.0781247
PRKCD	2869-68	SL000554	PKC-D	Protein kinase C delta type	Q05655	0.0863729	0.314546	0.0882437	0.138501	0.083729	0.126805	0.0863729	0.314546
CTSG	2431-17	SL000345	Cathepsin G	Cathepsin G	P08311	0.0151721	0.0193854	0.0153231	0.0399204	0.0169364	0.0580809	0.0151721	0.0193854
AIP	3839-60	SL011629	AIP	AH receptor-interacting protein	O00170	0.0445016	0.0470237	0.0269084	0.0578815	0.0351326	0.0582204	0.0445016	0.0470237
DAPK2	4355-13	SL007752	DAPK2	Death-associated protein kinase 2	Q9UIK4	0.0248926	0.0542669	0.0149415	0.0351897	0.0133789	0.0756623	0.0248926	0.0542669
SERPINA7	2706-69	SL000590	Thyroxine-Binding Globulin	Thyroxine-binding globulin	P05543	0.0609235	0.119235	0.0218981	0.0535388	0.0205902	0.103573	0.0609235	0.119235
MAPK8	3825-18	SL010502	MK08	Mitogen-activated protein kinase 8	P45983	0.0330772	0.140754	0.0135717	0.0258993	0.0210324	0.0358612	0.0330772	0.140754
HNRNPK	4994-178	SL002756	hnRNP K	Heterogeneous nuclear ribonucleoprotein K	P61978	0.0201633	0.0617285	0.0214133	0.0403218	0.0278956	0.0482232	0.0201633	0.0617285
GCKR	5223-59	SL015728	GCKR	Glucokinase regulatory protein	Q14397	0.0276046	0.0728095	0.0268727	0.0275775	0.0195009	0.0260362	0.0276046	0.0728095
NCR3	3003-29	SL005205	NKp30	Natural cytotoxicity triggering receptor 3	O14931	0.0225009	0.0848909	0.00832813	0.0302829	0.0159176	0.0392838	0.0225009	0.0848909
LCN2	2836-68	SL000695	Lipocalin 2	Neutrophil gelatinase-associated lipocalin	P80188	0.0404378	0.0543791	0.0202277	0.0337435	0.0345599	0.0362145	0.0404378	0.0543791
ZNRF3	14122-132	SL018971	ZNRF3	E3 ubiquitin-protein ligase ZNRF3	Q9ULT6	0.0215144	0.103779	0.0185617	0.0274656	0.02303	0.0329575	0.0215144	0.103779
NANOG	2732-58	SL005235	NANOG	Homeobox protein NANOG	Q9H9S0	0.0319865	0.188563	0.0355343	0.0534961	0.0429132	0.0457729	0.0319865	0.188563
MMP2	4160-49	SL000124	MMP-2	72 kDa type IV collagenase	P08253	0.0254367	0.0436231	0.0177017	0.0264216	0.0440309	0.0475316	0.0254367	0.0436231
HSD17B10	4217-49	SL004795	ERAB	3-hydroxyacyl-CoA dehydrogenase type-2	Q99714	0.0140698	0.12427	0.0388769	0.0959199	0.0351181	0.0425835	0.0140698	0.12427
SGTA	3868-8	SL011533	SGTA	Small glutamine-rich tetratricopeptide repeat-containing protein alpha	O43765	0.0265228	0.151831	0.0225972	0.0530095	0.0336535	0.0404988	0.0265228	0.151831
MICB	5102-55	SL005200	MICB	MHC class I polypeptide-related sequence B	Q29980	0.0252368	0.264982	0.0133785	0.0269236	0.0231732	0.0365664	0.0252368	0.264982
CD300C	5066-134	SL014270	CLM6	CMRF35-like molecule 6	Q08708	0.0271638	0.0465276	0.0205092	0.0387404	0.0400432	0.0360153	0.0271638	0.0465276
GPC2	3315-15	SL010463	GPC2	Glypican-2	Q8N158	0.0256393	0.330152	0.0301203	0.0429932	0.0271661	0.0636776	0.0256393	0.330152
ADSL	5023-23	SL009792	PUR8	Adenylosuccinate lyase	P30566	0.126442	0.41432	0.166883	0.168285	0.0838524	0.0506388	0.126442	0.41432
OSM	2693-20	SL000530	OSM	Oncostatin-M	P13725	0.0324657	0.0636718	0.0202777	0.0349998	0.0336255	0.0348191	0.0324657	0.0636718
MFRP	3685-53	SL010466	MFRP	Membrane frizzled-related protein	Q9BY79	0.0165725	0.0421348	0.019252	0.0323772	0.01465	0.0532026	0.0165725	0.0421348
PLG	4150-75	SL000540	Plasmin	Plasmin	P00747	0.020658	0.0480123	0.0184657	0.0285233	0.0186335	0.0321855	0.020658	0.0480123
DKKL1	3644-5	SL010381	Soggy-1	Dickkopf-like protein 1	Q9UK85	0.0546056	0.0752308	0.0286355	0.0404686	0.0386827	0.129612	0.0546056	0.0752308
GPC6	5350-14	SL012881	GPC6	Glypican-6	Q9Y625	0.0372937	0.0556631	0.0281964	0.0445322	0.044445	0.0368916	0.0372937	0.0556631
ANGPT4	2500-2	SL004643	Angiopoietin-4	Angiopoietin-4	Q9Y264	0.0242024	0.292499	0.0180681	0.0779759	0.0315958	0.0972889	0.0242024	0.292499
PIK3CG	3391-10	SL007250	PK3CG	Phosphatidylinositol 4,5-bisphosphate 3-kinase catalytic subunit gamma isoform	P48736	0.0391712	0.0921575	0.028118	0.0441932	0.0313721	0.0416597	0.0391712	0.0921575
MYC	10362-35	SL002565	c-Myc	Myc proto-oncogene protein	P01106	0.0180458	0.141305	0.0281445	0.0376399	0.021171	0.0278201	0.0180458	0.141305
KLK12	3199-54	SL003916	kallikrein 12	Kallikrein-12	Q9UKR0	0.054284	0.170293	0.0726606	0.0819772	0.0663051	0.0451385	0.054284	0.170293
SPON1	4297-62	SL005115	Spondin-1	Spondin-1	Q9HCB6	0.03377	0.104431	0.0496309	0.0602856	0.0332271	0.0399578	0.03377	0.104431
BTC	13088-397	SL000137	BTC	Betacellulin	P35070	0.0327126	0.846912	0.0228629	0.0354463	0.0253001	0.0466907	0.0327126	0.846912
AKR1A1	4192-10	SL008039	AK1A1	Alcohol dehydrogenase [NADP(+)]	P14550	0.0258328	0.0637522	0.0265752	0.0353867	0.018404	0.0320146	0.0258328	0.0637522
PSMA1	3859-50	SL010973	PSA1	Proteasome subunit alpha type-1	P25786	0.0241735	0.0402915	0.0293283	0.0333314	0.0318376	0.0387417	0.0241735	0.0402915
IL17D	4136-40	SL004353	IL-17D	Interleukin-17D	Q8TAD2	0.0280172	0.132569	0.0243368	0.0595641	0.0222754	0.066129	0.0280172	0.132569
SERPINE2	3217-74	SL004457	Protease nexin I	Glia-derived nexin	P07093	0.0329018	0.237068	0.0226214	0.0816482	0.0348936	0.0743958	0.0329018	0.237068
CDH12	3656-9	SL004864	Cadherin-12	Cadherin-12	P55289	0.0217239	0.117647	0.0223515	0.0537447	0.0110998	0.061142	0.0217239	0.117647
SPTAN1	5031-10	SL008190	SPTA2	Spectrin alpha chain, non-erythrocytic 1	Q13813	0.0248257	0.0891976	0.0182953	0.0563754	0.0239856	0.0551704	0.0248257	0.0891976
PTK2	4986-59	SL012248	FAK1	Focal adhesion kinase 1	Q05397	0.0126632	0.0424746	0.0149137	0.0346361	0.0176797	0.0406658	0.0126632	0.0424746
PLAUR	2652-15	SL002506	suPAR	Urokinase plasminogen activator surface receptor	Q03405	0.0299498	0.0497299	0.0293146	0.0443988	0.0274996	0.0364269	0.0299498	0.0497299
L1CAM	4246-40	SL004154	NCAM-L1	Neural cell adhesion molecule L1	P32004	0.0590123	0.122746	0.0472498	0.0897696	0.044409	0.0422663	0.0590123	0.122746
CD59	11514-196	SL004557	CD59	CD59 glycoprotein	P13987	0.042476	0.0784605	0.0411479	0.0561129	0.0422209	0.0417866	0.042476	0.0784605
LIN7B	4238-4	SL012168	LIN7B	Protein lin-7 homolog B	Q9HAP6	0.017415	0.0393717	0.0143925	0.0336686	0.0138744	0.0356328	0.017415	0.0393717
TBP	2875-15	SL006923	TBP	TATA-box-binding protein	P20226	0.0161422	0.234565	0.0213735	0.024464	0.0200199	0.045637	0.0161422	0.234565
IL37	2723-9	SL005178	IL-1F7	Interleukin-37	Q9NZH6	0.0293222	0.0846958	0.0313048	0.0420843	0.0687546	0.0480559	0.0293222	0.0846958
CCL20	2468-62	SL000133	MIP-3a	C-C motif chemokine 20	P78556	0.0233012	0.165372	0.0265785	0.0732022	0.0294526	0.0581767	0.0233012	0.165372
KRAS	5193-51	SL002542	K-ras	GTPase KRas	P01116	0.0267213	0.111582	0.035655	0.0373535	0.0337505	0.045281	0.0267213	0.111582
CD33	3166-92	SL005215	Siglec-3	Myeloid cell surface antigen CD33	P20138	0.0298144	0.0500321	0.0144655	0.0344583	0.0258043	0.0411495	0.0298144	0.0500321
CNTN5	3299-29	SL010455	Contactin-5	Contactin-5	O94779	0.022882	0.041176	0.0272558	0.0371454	0.0227188	0.0302567	0.022882	0.041176
OAS1	10361-25	SL014684	OAS1	2'-5'-oligoadenylate synthase 1	P00973	0.0167033	0.166834	0.0174309	0.0441472	0.0186501	0.0348999	0.0167033	0.166834
CA6	3352-80	SL010288	Carbonic anhydrase 6	Carbonic anhydrase 6	P23280	0.0275098	0.201444	0.0177598	0.0257523	0.0287693	0.0795354	0.0275098	0.201444
MMEL1	3627-71	SL010376	MMEL2	Membrane metallo-endopeptidase-like 1	Q495T6	0.0252823	0.0295725	0.0302411	0.0272005	0.0229985	0.0476284	0.0252823	0.0295725
CHST2	4428-1	SL013988	CHST2	Carbohydrate sulfotransferase 2	Q9Y4C5	0.0421638	0.203519	0.0314486	0.0804586	0.0250121	0.0650179	0.0421638	0.203519
CTSB	3061-61	SL000343	Cathepsin B	Cathepsin B	P07858	0.0292482	0.10974	0.0230765	0.0485071	0.0212453	0.0251307	0.0292482	0.10974
CDH2	3797-1	SL000638	Cadherin-2	Cadherin-2	P19022	0.0319544	0.259559	0.0358395	0.0508025	0.0299523	0.0374808	0.0319544	0.259559
CTSF	9212-22	SL008381	CATF	Cathepsin F	Q9UBX1	0.0290139	0.0319567	0.0314597	0.0471749	0.0371482	0.046491	0.0290139	0.0319567
DDR1	4122-12	SL004119	discoidin domain receptor 1	Epithelial discoidin domain-containing receptor 1	Q08345	0.0308252	0.0411273	0.016579	0.0370794	0.033946	0.0424132	0.0308252	0.0411273
TNFSF18	2708-54	SL004326	TNFSF18	Tumor necrosis factor ligand superfamily member 18	Q9UNG2	0.0224061	0.0716301	0.0190322	0.0243068	0.0240398	0.0357591	0.0224061	0.0716301
ETHE1	3847-56	SL011532	ETHE1	Persulfide dioxygenase ETHE1, mitochondrial	O95571	0.0265499	0.0423861	0.0270561	0.033648	0.0302596	0.0360183	0.0265499	0.0423861
SLC25A18	5280-68	SL016563	GHC2	Mitochondrial glutamate carrier 2	Q9H1K4	0.0189536	0.106351	0.0341676	0.0488043	0.0232167	0.0571589	0.0189536	0.106351
NCAM1	4498-62	SL003764	NCAM-120	Neural cell adhesion molecule 1, 120 kDa isoform	P13591	0.0272986	0.080882	0.017344	0.0288766	0.0379808	0.0309211	0.0272986	0.080882
LMNB1	3889-64	SL006132	Lamin-B1	Lamin-B1	P20700	0.0222749	0.227692	0.0162753	0.0368107	0.0251382	0.0365328	0.0222749	0.227692
CCL17	3519-3	SL003196	TARC	C-C motif chemokine 17	Q92583	0.0193169	0.148928	0.0200891	0.0343869	0.014856	0.0288312	0.0193169	0.148928
DSC3	4981-6	SL008709	DSC3	Desmocollin-3	Q14574	0.034118	0.0655992	0.0177261	0.0448885	0.017929	0.0442371	0.034118	0.0655992
FST	4132-27	SL000674	FST	Follistatin	P19883	0.0330586	0.0779977	0.0188089	0.0541795	0.0193225	0.051457	0.0330586	0.0779977
EPO	5813-58	SL000408	Epo	Erythropoietin	P01588	0.0263779	0.0752199	0.0137752	0.0322765	0.0263254	0.0435554	0.0263779	0.0752199
KLRF1	5098-79	SL014209	KLRF1	Killer cell lectin-like receptor subfamily F member 1	Q9NZS2	0.0273601	0.0422794	0.0211419	0.0364693	0.0154131	0.0309981	0.0273601	0.0422794
IL11	4493-92	SL000470	IL-11	Interleukin-11	P20809	0.0196327	0.228394	0.027008	0.0480567	0.0221954	0.0458024	0.0196327	0.228394
MATN2	3325-2	SL010465	MATN2	Matrilin-2	O00339	0.0221341	0.0290415	0.0299453	0.041728	0.021739	0.0263801	0.0221341	0.0290415
ECE1	3611-70	SL004060	Endothelin-converting enzyme 1	Endothelin-converting enzyme 1	P42892	0.0188169	0.130553	0.0182855	0.0283422	0.0139361	0.01956	0.0188169	0.130553
CTGF	2975-19	SL002655	CTGF	Connective tissue growth factor	P29279	0.0255976	0.0888703	0.0417022	0.0326567	0.0342331	0.0407802	0.0255976	0.0888703
ADGRG5	4551-72	SL014094	GP114	Adhesion G-protein coupled receptor G5	Q8IZF4	0.0311188	0.121149	0.042237	0.0576052	0.0400434	0.0511928	0.0311188	0.121149
SIGLEC14	5125-6	SL014292	SIG14	Sialic acid-binding Ig-like lectin 14	Q08ET2	0.0206536	0.0307182	0.0138391	0.0237591	0.0119458	0.0227735	0.0206536	0.0307182
FCGR1A	3312-64	SL010461	FCGR1	High affinity immunoglobulin gamma Fc receptor I	P12314	0.0174212	0.0477436	0.0236969	0.0500455	0.0288343	0.054008	0.0174212	0.0477436
AZU1	2751-16	SL004589	Azurocidin	Azurocidin	P20160	0.0389916	0.0581292	0.0270647	0.0360425	0.0298741	0.0504777	0.0389916	0.0581292
LTBP4	13133-73	SL007033	LTBP4	Latent-transforming growth factor beta-binding protein 4	Q8N2S1	0.0179458	0.0582179	0.0187087	0.0416494	0.01803	0.0301016	0.0179458	0.0582179
VTN	13125-45	SL000616	Vitronectin	Vitronectin	P04004	0.0261226	0.0364737	0.0226155	0.0288021	0.0216224	0.022437	0.0261226	0.0364737
CD93	14136-234	SL007696	C1QR1	Complement component C1q receptor	Q9NPY3	0.0264995	0.0223255	0.0188769	0.0357297	0.0355762	0.0437276	0.0264995	0.0223255
LGALS9	9197-4	SL008486	LEG9	Galectin-9	O00182	0.0184572	0.0627044	0.0224305	0.0386637	0.0246544	0.0311467	0.0184572	0.0627044
RNF43	14120-2	SL018629	RNF43	E3 ubiquitin-protein ligase RNF43	Q68DV7	0.0302705	0.137328	0.0227508	0.0601315	0.0254529	0.0436126	0.0302705	0.137328
GFRA3	2505-49	SL004144	GFRa-3	GDNF family receptor alpha-3	O60609	0.0152619	0.0386174	0.0152392	0.0264784	0.0162552	0.0286542	0.0152619	0.0386174
TNFRSF19	5131-15	SL004863	TAJ	Tumor necrosis factor receptor superfamily member 19	Q9NS68	0.0140735	0.0638366	0.0201665	0.033395	0.0166535	0.0253861	0.0140735	0.0638366
IL20RA	5085-18	SL005181	IL-20 Ra	Interleukin-20 receptor subunit alpha	Q9UHF4	0.0291019	0.164654	0.017241	0.0418168	0.0153216	0.0564948	0.0291019	0.164654
IL1RAP	2630-12	SL004588	IL-1 R AcP	Interleukin-1 Receptor accessory protein	Q9NPH3	0.0198903	0.117013	0.0254437	0.032432	0.0336598	0.0265923	0.0198903	0.117013
Human-virus	2769-3	SL000445	HIV-2 Rev	Protein Rev_HV2BE	P18093	0.0833936	0.173939	0.0453409	0.080714	0.0486857	0.0653549	0.0833936	0.173939
EPHA2	4834-61	SL002654	Epithelial cell kinase	Ephrin type-A receptor 2	P29317	0.0542152	0.116878	0.0477703	0.0844783	0.0477159	0.0728363	0.0542152	0.116878
P4HB	4278-14	SL004901	Protein disulfide-isomerase	Protein disulfide-isomerase	P07237	0.0275578	0.0834785	0.0287719	0.0528106	0.0309557	0.0484407	0.0275578	0.0834785
NR1D1	5236-2	SL007145	NR1D1	Nuclear receptor subfamily 1 group D member 1	P20393	0.0266612	0.0313826	0.0340914	0.038306	0.0266362	0.047914	0.0266612	0.0313826
PROC	2961-1	SL000048	Protein C	Vitamin K-dependent protein C	P04070	0.0453049	0.0499661	0.0284024	0.0906696	0.033739	0.0742081	0.0453049	0.0499661
AMN	4322-28	SL013489	AMNLS	Protein amnionless	Q9BXJ7	0.0282506	0.0773989	0.0292721	0.0347587	0.0281756	0.0569029	0.0282506	0.0773989
PDGFRB	3459-49	SL004155	PDGF Rb	Platelet-derived growth factor receptor beta	P09619	0.0276305	0.0977816	0.0207005	0.0335449	0.027251	0.0311441	0.0276305	0.0977816
IL27RA	5132-71	SL005223	TCCR	Interleukin-27 receptor subunit alpha	Q6UWB1	0.05394	0.0659241	0.0521924	0.0799215	0.0289649	0.0477413	0.05394	0.0659241
S100A12	5852-6	SL004783	S100A12	Protein S100-A12	P80511	0.034354	0.213045	0.0343622	0.0545771	0.036624	0.0459577	0.034354	0.213045
SERPINF2	3024-18	SL000250	a2-Antiplasmin	Alpha-2-antiplasmin	P08697	0.0353694	0.0360969	0.0293184	0.0637309	0.033	0.0629099	0.0353694	0.0360969
ALB	3707-12	SL000254	Albumin	Serum albumin	P02768	0.0242141	0.138042	0.0291198	0.0554559	0.0309053	0.0352788	0.0242141	0.138042
CLEC11A	2966-65	SL004362	SCGF-beta	Stem Cell Growth Factor-beta	Q9Y240	0.0258793	0.0695019	0.0166172	0.0277453	0.0315631	0.0261871	0.0258793	0.0695019
ZAP70	4476-22	SL010519	ZAP70	Tyrosine-protein kinase ZAP-70	P43403	0.0481301	0.166855	0.0428345	0.0577916	0.0367693	0.0531177	0.0481301	0.166855
ISLR2	13124-20	SL018587	ISLR2	Immunoglobulin superfamily containing leucine-rich repeat protein 2	Q6UXK2	0.0195868	0.0852151	0.0135145	0.0358238	0.0446334	0.0453159	0.0195868	0.0852151
DCN	2666-53	SL004081	Bone proteoglycan II	Decorin	P07585	0.0223952	0.0303544	0.0196917	0.0320565	0.0232043	0.0504175	0.0223952	0.0303544
CST5	3803-10	SL008382	CYTD	Cystatin-D	P28325	0.025865	0.785096	0.0118331	0.0369796	0.041137	0.0834597	0.025865	0.785096
C3	5803-24	SL003362	C3d	Complement C3d fragment	P01024	0.185061	0.308439	0.0915837	0.105226	0.0635381	0.110261	0.185061	0.308439
EPHB4	3612-6	SL004845	EphB4	Ephrin type-B receptor 4	P54760	0.0285116	0.0312602	0.0217737	0.035736	0.0182054	0.0643316	0.0285116	0.0312602
NBL1	2944-66	SL005156	DAN	Neuroblastoma suppressor of tumorigenicity 1	P41271	0.0302895	0.088713	0.0336635	0.0583646	0.0265176	0.0465199	0.0302895	0.088713
FGF18	2761-49	SL004336	FGF-18	Fibroblast growth factor 18	O76093	0.021715	0.0431345	0.0213615	0.0600957	0.0260915	0.0452112	0.021715	0.0431345
KLRK1	3056-11	SL005204	NKG2D	NKG2-D type II integral membrane protein	P26718	0.0171298	0.265546	0.0263313	0.0317835	0.0116938	0.0272717	0.0171298	0.265546
KLK11	2831-29	SL002763	Kallikrein 11	Kallikrein-11	Q9UBX7	0.0286148	0.205272	0.0200752	0.0289276	0.0244157	0.0418002	0.0286148	0.205272
CCL3L1	2783-18	SL004355	LD78-beta	C-C motif chemokine 3-like 1	P16619	0.0221019	0.0608908	0.0188445	0.0464505	0.0212077	0.0345519	0.0221019	0.0608908
CLEC7A	3603-60	SL007640	CLC7A	C-type lectin domain family 7 member A	Q9BXN2	0.0213425	0.0918333	0.0298664	0.0358916	0.00931212	0.0484606	0.0213425	0.0918333
LCK	3452-17	SL006916	LCK	Tyrosine-protein kinase Lck	P06239	0.0250438	0.421177	0.0143202	0.0511099	0.0211888	0.0411971	0.0250438	0.421177
SCARF2	5130-67	SL005222	SREC-II	Scavenger receptor class F member 2	Q96GP6	0.029172	0.105874	0.0307359	0.0570105	0.0299686	0.0526534	0.029172	0.105874
B2M	3485-28	SL000283	b2-Microglobulin	Beta-2-microglobulin	P61769	0.0491454	0.0952939	0.0360196	0.086411	0.033458	0.0408337	0.0491454	0.0952939
CSH1 CSH2	13103-125	SL009328	CSH	Chorionic somatomammotropin hormone	P0DML2 P0DML3	0.0213188	0.271976	0.0128461	0.0506973	0.0343931	0.0359509	0.0213188	0.271976
CSF2	4697-59	SL001726	GM-CSF	Granulocyte-macrophage colony-stimulating factor	P04141	0.0215973	0.193321	0.0178021	0.0480281	0.0185109	0.050411	0.0215973	0.193321
IL17F	2775-54	SL004352	IL-17F	Interleukin-17F	Q96PD4	0.0207239	0.0639791	0.0249347	0.0510648	0.0251099	0.0367682	0.0207239	0.0639791
CDK8 CCNC	3359-11	SL010522	CDK8/cyclin C	Cyclin-dependent kinase 8:Cyclin-C complex	P49336 P24863	0.0218555	0.163453	0.0207287	0.04225	0.0311315	0.0314458	0.0218555	0.163453
TNFRSF1B	3152-57	SL001800	TNF sR-II	Tumor necrosis factor receptor superfamily member 1B	P20333	0.0189361	0.0289074	0.0132945	0.024606	0.0189452	0.0272802	0.0189361	0.0289074
PRDX5	5017-19	SL004932	Peroxiredoxin-5	Peroxiredoxin-5, mitochondrial	P30044	0.0767165	0.131329	0.0194045	0.0236883	0.02629	0.0627063	0.0767165	0.131329
CRLF2	2746-56	SL005226	TSLP R	Cytokine receptor-like factor 2	Q9HC73	0.0180134	0.0320375	0.0204662	0.0353738	0.0185964	0.0367808	0.0180134	0.0320375
HSPA8	5903-91	SL004899	HSP70 protein 8	Heat shock cognate 71 kDa protein	P11142	0.0308086	0.0395939	0.0271673	0.0509642	0.0279831	0.0443294	0.0308086	0.0395939
CAMK2D	3419-49	SL010493	CAMK2D	Calcium/calmodulin-dependent protein kinase type II subunit delta	Q13557	0.0156025	0.0957478	0.0318316	0.0416376	0.0299472	0.0338707	0.0156025	0.0957478
CSF3	4840-73	SL001729	G-CSF	Granulocyte colony-stimulating factor	P09919	0.0252071	0.461969	0.0229949	0.0470476	0.0349613	0.0370877	0.0252071	0.461969
EREG	4956-2	SL000139	EPI	Epiregulin	O14944	0.0174935	0.0363362	0.0262812	0.0474208	0.0162185	0.0392747	0.0174935	0.0363362
MMP17	2838-53	SL003332	MMP-17	Matrix metalloproteinase-17	Q9ULZ9	0.0167067	0.0769793	0.0175567	0.0363491	0.0147614	0.0312946	0.0167067	0.0769793
LYZ	4920-10	SL000510	Lysozyme	Lysozyme C	P61626	0.0759069	0.0727638	0.0519903	0.0620471	0.0490575	0.0454112	0.0759069	0.0727638
SERPING1	4479-14	SL000308	C1-Esterase Inhibitor	Plasma protease C1 inhibitor	P05155	0.0264518	0.184999	0.0170275	0.0279303	0.0228901	0.0269386	0.0264518	0.184999
TFF2	9191-8	SL002602	Trefoil factor 2	Trefoil factor 2	Q03403	0.0260189	0.0762747	0.0260255	0.0359282	0.0256516	0.0394198	0.0260189	0.0762747
SIRPA	5430-66	SL008967	SHPS1	Tyrosine-protein phosphatase non-receptor type substrate 1	P78324	0.017833	0.0798125	0.00791381	0.0285376	0.0163662	0.0295172	0.017833	0.0798125
SKP1	3902-21	SL008808	SKP1	S-phase kinase-associated protein 1	P63208	0.0286435	0.0331137	0.0248747	0.0277681	0.025267	0.0732243	0.0286435	0.0331137
CTSC	3178-5	SL007280	CATC	Dipeptidyl peptidase 1	P53634	0.0142827	0.0351757	0.0186571	0.0493057	0.0206117	0.0342647	0.0142827	0.0351757
MPO	2580-83	SL001796	Myeloperoxidase	Myeloperoxidase	P05164	0.0147416	0.0455473	0.0188293	0.0318789	0.0172971	0.0208617	0.0147416	0.0455473
TP53	6152-111	SL000074	p53	Cellular tumor antigen p53	P04637	0.0307675	0.119695	0.0175441	0.0518555	0.0318936	0.0608574	0.0307675	0.119695
USP25	9215-117	SL018947	UBP25	Ubiquitin carboxyl-terminal hydrolase 25	Q9UHP3	0.0217958	0.0332191	0.02434	0.0468812	0.0211192	0.0389757	0.0217958	0.0332191
IFNA2	3497-13	SL002075	IFN-aA	Interferon alpha-2	P01563	0.056167	0.09337	0.102593	0.114221	0.0406706	0.227385	0.056167	0.09337
STAT3	10346-5	SL007221	STAT3	Signal transducer and activator of transcription 3	P40763	0.0308634	0.0798335	0.0240516	0.0491509	0.0253107	0.0396475	0.0308634	0.0798335
CD40LG	3534-14	SL003862	CD40 ligand, soluble	CD40 ligand	P29965	0.0175215	0.10332	0.022642	0.0459108	0.0234835	0.033541	0.0175215	0.10332
KYNU	4559-64	SL013969	KYNU	Kynureninase	Q16719	0.0266657	0.0497311	0.0304574	0.038588	0.0163412	0.0241152	0.0266657	0.0497311
PRDX1	3855-56	SL004919	Peroxiredoxin-1	Peroxiredoxin-1	Q06830	0.0372489	0.0892816	0.0281227	0.033714	0.0754796	0.0624444	0.0372489	0.0892816
IL4	2906-55	SL000480	IL-4	Interleukin-4	P05112	0.0217519	0.0495045	0.0215035	0.0311322	0.0218961	0.0317152	0.0217519	0.0495045
LYVE1	3206-4	SL008904	LYVE1	Lymphatic vessel endothelial hyaluronic acid receptor 1	Q9Y5Y7	0.0476637	0.117007	0.0332399	0.0517874	0.0478573	0.102042	0.0476637	0.117007
FUT5	4549-78	SL014008	FUT5	Alpha-(1,3)-fucosyltransferase 5	Q11128	0.0215945	0.0654767	0.0148558	0.0380218	0.0225323	0.0296935	0.0215945	0.0654767
ARSB	3172-28	SL008956	ARSB	Arylsulfatase B	P15848	0.0215215	0.410619	0.0196064	0.0275193	0.029138	0.0333305	0.0215215	0.410619
SEMA6A	5122-92	SL005214	Semaphorin-6A	Semaphorin-6A	Q9H2E6	0.0502018	0.0527846	0.0469237	0.0601063	0.0429977	0.0683041	0.0502018	0.0527846
TNFSF4	2839-2	SL004649	OX40 Ligand	Tumor necrosis factor ligand superfamily member 4	P23510	0.0202466	0.17802	0.030993	0.0518911	0.014445	0.0514935	0.0202466	0.17802
LSAMP	2999-6	SL005196	LSAMP	Limbic system-associated membrane protein	Q13449	0.0127723	0.0554088	0.020877	0.0428111	0.0174376	0.0277611	0.0127723	0.0554088
HDGFRP2	4553-65	SL014009	HDGR2	Hepatoma-derived growth factor-related protein 2	Q7Z4V5	0.0221301	0.0453053	0.016363	0.0310059	0.0222677	0.0340503	0.0221301	0.0453053
FGA FGB FGG	4907-56	SL000022	D-dimer	D-dimer	P02671 P02675 P02679	0.0575923	0.0477651	0.0200328	0.251541	0.0386711	0.0542882	0.0575923	0.0477651
ARG1	5867-60	SL008008	ARGI1	Arginase-1	P05089	0.0195687	0.0849322	0.0185612	0.0644838	0.0169518	0.0669851	0.0195687	0.0849322
IL22RA2	5087-5	SL005183	IL-22BP	Interleukin-22 receptor subunit alpha-2	Q969J5	0.0197456	0.0735744	0.0189203	0.0231789	0.0162917	0.0347544	0.0197456	0.0735744
VAV1	5275-28	SL014488	VAV	Proto-oncogene vav	P15498	0.0223119	0.0607416	0.0259639	0.0433694	0.0232516	0.0474753	0.0223119	0.0607416
AGER	4125-52	SL003680	sRAGE	Advanced glycosylation end product-specific receptor, soluble	Q15109	0.0213426	0.0933957	0.0243589	0.054504	0.018673	0.0224049	0.0213426	0.0933957
PPP3R1	3657-74	SL004720	Calcineurin B a	Calcineurin subunit B type 1	P63098	0.058722	0.0690564	0.0222899	0.0430776	0.053784	0.0801943	0.058722	0.0690564
GPT	3709-4	SL000617	ALT	Alanine aminotransferase 1	P24298	0.0277294	0.114044	0.0492591	0.0428229	0.039065	0.0410289	0.0277294	0.114044
IL34	4556-10	SL013548	IL-34	Interleukin-34	Q6ZMJ4	0.0288291	0.0650007	0.0153913	0.038428	0.0358536	0.0334381	0.0288291	0.0650007
SMAD3	10363-13	SL004097	SMAD3	Mothers against decapentaplegic homolog 3	P84022	0.0356236	0.034739	0.0265168	0.0577667	0.0294827	0.0581353	0.0356236	0.034739
CPE	5343-74	SL008703	CBPE	Carboxypeptidase E	P16870	0.0239714	0.0692329	0.0155315	0.0423536	0.0313451	0.0430682	0.0239714	0.0692329
NOTCH1	5107-7	SL005703	Notch 1	Neurogenic locus notch homolog protein 1	P46531	0.0432041	0.0317311	0.0309706	0.0436516	0.0197566	0.0327025	0.0432041	0.0317311
DCTN2	5879-51	SL009207	Dynactin subunit 2	Dynactin subunit 2	Q13561	0.0300252	0.055801	0.0265314	0.0557428	0.0304527	0.0340288	0.0300252	0.055801
TBK1	3400-49	SL007747	TBK1	Serine/threonine-protein kinase TBK1	Q9UHD2	0.0183778	0.107437	0.022006	0.0555491	0.0151201	0.0559901	0.0183778	0.107437
KIR2DL4	5095-21	SL012698	KI2L4	Killer cell immunoglobulin-like receptor 2DL4	Q99706	0.0290072	0.0837378	0.0251592	0.0430143	0.0218205	0.0505809	0.0290072	0.0837378
MST1	4407-10	SL005202	MSP	Hepatocyte growth factor-like protein	P26927	0.0579296	0.226881	0.0387483	0.0662173	0.0376739	0.0531434	0.0579296	0.226881
IL10RB	2631-50	SL004147	IL-10 Rb	Interleukin-10 receptor subunit beta	Q08334	0.0226233	0.0428143	0.0219571	0.0266718	0.0240596	0.0308306	0.0226233	0.0428143
CTSH	8465-52	SL000346	Cathepsin H	Cathepsin H	P09668	0.0298951	0.120626	0.0223461	0.0540081	0.039496	0.0724655	0.0298951	0.120626
AGT	3484-60	SL000271	Angiotensinogen	Angiotensinogen	P01019	0.050203	0.4308	0.0318698	0.0676262	0.0595884	0.239935	0.050203	0.4308
EPHB6	5078-82	SL008414	EphB6	Ephrin type-B receptor 6	O15197	0.0163158	0.0832005	0.0176031	0.0325745	0.0145784	0.0323347	0.0163158	0.0832005
CD4	3143-3	SL002524	sCD4	T-cell surface glycoprotein CD4	P01730	0.0178891	0.0535301	0.0213329	0.0400775	0.0179008	0.0425386	0.0178891	0.0535301
FGG	4989-7	SL003341	Fibrinogen g-chain dimer	Fibrinogen gamma chain	P02679	0.0694403	0.071876	0.0404442	0.186612	0.0379179	0.0571285	0.0694403	0.071876
PRKCQ	3817-18	SL007358	KPCT	Protein kinase C theta type	Q04759	0.0411783	0.134025	0.0388686	0.0511845	0.0213846	0.0441229	0.0411783	0.134025
GRN	4992-49	SL007173	GRN	Granulins	P28799	0.0166686	0.024859	0.0137704	0.023271	0.0179403	0.0252643	0.0166686	0.024859
APOD	4712-28	SL005361	Apo D	Apolipoprotein D	P05090	0.0711187	0.126591	0.04585	0.0672123	0.0523343	0.0832824	0.0711187	0.126591
MSN	5009-11	SL005846	Moesin	Moesin	P26038	0.021834	0.0282101	0.0211451	0.041582	0.0292377	0.0347525	0.021834	0.0282101
EGFR	2677-1	SL002644	ERBB1	Epidermal growth factor receptor	P00533	0.0483977	0.0405169	0.024908	0.0410757	0.0367061	0.0385652	0.0483977	0.0405169
TNFRSF12A	5138-50	SL004366	TWEAKR	Tumor necrosis factor receptor superfamily member 12A	Q9NP84	0.03134	0.0813782	0.0299269	0.0466003	0.0250593	0.0365533	0.03134	0.0813782
PARK7	5016-61	SL008933	PARK7	Protein deglycase DJ-1	Q99497	0.0260177	0.0689764	0.0168477	0.0198083	0.0311477	0.0420567	0.0260177	0.0689764
ACP1	3858-5	SL008063	PPAC	Low molecular weight phosphotyrosine protein phosphatase	P24666	0.0201922	0.127778	0.0240468	0.0447023	0.0254683	0.0357785	0.0201922	0.127778
AMIGO2	14134-49	SL015046	AMGO2	Amphoterin-induced protein 2	Q86SJ2	0.0361936	0.0817489	0.0356093	0.0633705	0.0503552	0.0579205	0.0361936	0.0817489
IL1RL2	2994-71	SL004875	IL-1Rrp2	Interleukin-1 receptor-like 2	Q9HB29	0.0218865	0.302523	0.016474	0.0325931	0.0157868	0.027551	0.0218865	0.302523
PRKAA1 PRKAB1 PRKAG1	5183-53	SL016548	AMPK a1b1g1	AMP Kinase (alpha1beta1gamma1)	Q13131 Q9Y478 P54619	0.0160293	0.0378232	0.0423157	0.0488255	0.0266651	0.032947	0.0160293	0.0378232
PIM1	5359-65	SL002702	PIM1	Serine/threonine-protein kinase pim-1	P11309	0.0153015	0.378457	0.0195183	0.0355138	0.0209296	0.031158	0.0153015	0.378457
ELANE	5308-89	SL000401	Elastase	Neutrophil elastase	P08246	0.0409647	0.0545225	0.0400472	0.0548546	0.0223515	0.054909	0.0409647	0.0545225
LRRTM3	4453-83	SL014108	LRRT3	Leucine-rich repeat transmembrane neuronal protein 3	Q86VH5	0.0374768	0.129397	0.0198972	0.0487558	0.0218857	0.0578959	0.0374768	0.129397
PSME3	5204-13	SL005308	PSME3	Proteasome activator complex subunit 3	P61289	0.0281861	0.648276	0.0195784	0.0575525	0.0152097	0.0569592	0.0281861	0.648276
FCGR3B	3311-27	SL008609	FCG3B	Low affinity immunoglobulin gamma Fc region receptor III-B	O75015	0.0518417	0.0477386	0.0309195	0.0932701	0.0263942	0.0675939	0.0518417	0.0477386
FGF8	2443-10	SL004342	FGF-8B	Fibroblast growth factor 8 isoform B	P55075	0.0260783	0.0531401	0.0224314	0.0337705	0.0267963	0.0292279	0.0260783	0.0531401
STC1	4930-21	SL005789	Stanniocalcin-1	Stanniocalcin-1	P52823	0.0236094	0.0657952	0.0217347	0.0327456	0.0188547	0.0344907	0.0236094	0.0657952
APOE	5312-49	SL000277	Apo E2	Apolipoprotein E (isoform E2)	P02649	0.0730417	0.0698572	0.0558702	0.0931755	0.0517276	0.0797216	0.0730417	0.0698572
CCL11	5301-7	SL000406	Eotaxin	Eotaxin	P51671	0.0245905	0.195814	0.0137675	0.0304044	0.0226558	0.0305842	0.0245905	0.195814
IGFBP5	2685-21	SL004676	IGFBP-5	Insulin-like growth factor-binding protein 5	P24593	0.0362584	0.130855	0.030474	0.0497208	0.0301851	0.0413783	0.0362584	0.130855
GZMH	3373-5	SL004654	Granzyme H	Granzyme H	P20718	0.02983	0.0957584	0.0136021	0.041813	0.0188092	0.0361617	0.02983	0.0957584
POMC	2558-51	SL000300	b-Endorphin	Beta-endorphin	P01189	0.0187322	0.0417318	0.0166136	0.0612325	0.0158559	0.0572104	0.0187322	0.0417318
NTRK1	3477-63	SL005225	TrkA	High affinity nerve growth factor receptor	P04629	0.0458572	0.0467838	0.0267345	0.0485793	0.0322351	0.0476426	0.0458572	0.0467838
IL1B	3037-62	SL001795	IL-1b	Interleukin-1 beta	P01584	0.0632364	0.0750819	0.0601576	0.10769	0.0702073	0.0790897	0.0632364	0.0750819
CFD	2946-52	SL003327	Factor D	Complement factor D	P00746	0.0403391	0.0868712	0.0318244	0.0439943	0.0520626	0.0554585	0.0403391	0.0868712
LTA LTB	3505-6	SL000507	Lymphotoxin a1/b2	Lymphotoxin alpha1:beta2	P01374, Q06643	0.0643235	0.104209	0.0309039	0.04457	0.031485	0.0418529	0.0643235	0.104209
DSG1	2976-58	SL004856	Desmoglein-1	Desmoglein-1	Q02413	0.0342073	0.0557801	0.0243487	0.0339175	0.0338999	0.0410306	0.0342073	0.0557801
NGF	5801-72	SL000305	b-NGF	beta-nerve growth factor	P01138	0.0185617	0.745383	0.0114351	0.0461282	0.0210504	0.043328	0.0185617	0.745383
CHST15	4469-78	SL007502	ST4S6	Carbohydrate sulfotransferase 15	Q7LFX5	0.0198288	0.113385	0.0262671	0.0391979	0.0168425	0.0263756	0.0198288	0.113385
AGRP	2813-11	SL006924	ART	Agouti-related protein	O00253	0.0353595	0.0582418	0.0517973	0.0472904	0.0363405	0.0697444	0.0353595	0.0582418
MUC1	9176-3	SL000001	MUC1	Mucin-1	P15941	0.0278775	0.0358953	0.0286032	0.0489868	0.035759	0.0482832	0.0278775	0.0358953
CDKN1B	3719-2	SL000076	p27Kip1	Cyclin-dependent kinase inhibitor 1B	P46527	0.0229352	0.11412	0.0276681	0.023891	0.0171132	0.0318323	0.0229352	0.11412
CCL14	2900-53	SL003329	HCC-1	C-C motif chemokine 14	Q16627	0.0420222	0.043273	0.0293486	0.0468129	0.042647	0.0380004	0.0420222	0.043273
EGFR	5328-33	SL016828	EGFRvIII	Epidermal growth factor receptor variant III	P00533	0.0260284	0.662521	0.0271399	0.0842249	0.051249	0.0528689	0.0260284	0.662521
AK1	5012-67	SL004296	Myokinase, human	Adenylate kinase isoenzyme 1	P00568	0.0178132	0.0833045	0.0239429	0.035602	0.0151116	0.0316526	0.0178132	0.0833045
HBEGF	4134-4	SL000138	HB-EGF	Heparin-binding EGF-like growth factor	Q99075	0.0252661	0.0409941	0.0237355	0.0402306	0.0235977	0.0334682	0.0252661	0.0409941
ABL1	3341-33	SL006892	ABL1	Tyrosine-protein kinase ABL1	P00519	0.0407052	0.0946082	0.0311793	0.0508005	0.0211854	0.0606618	0.0407052	0.0946082
INSR	3448-13	SL004125	IR	Insulin receptor	P06213	0.0305242	0.0462638	0.0218331	0.034495	0.0327973	0.0417911	0.0305242	0.0462638
C10orf54	14123-34	SL017424	GI24	Platelet receptor Gi24	Q9H7M9	0.0397687	0.0448505	0.026964	0.0359881	0.0191711	0.0334831	0.0397687	0.0448505
IL17RA	2992-59	SL004850	IL-17 sR	Interleukin-17 receptor A	Q96F46	0.016326	0.238712	0.0285369	0.0416155	0.0484188	0.0344084	0.016326	0.238712
CALR	5264-65	SL003520	calreticulin	Calreticulin	P27797	0.0184041	0.379402	0.0193018	0.0458427	0.0254855	0.057971	0.0184041	0.379402
PYY	3727-35	SL011509	PYY	Peptide YY	P10082	0.038691	0.0479357	0.0428321	0.059081	0.0402227	0.0574694	0.038691	0.0479357
PDGFC	3828-54	SL011071	PDGF-CC	Platelet-derived growth factor C	Q9NRA1	0.0220086	0.233404	0.0327801	0.0489273	0.0215803	0.0294479	0.0220086	0.233404
MMP10	8479-4	SL000645	MMP-10	Stromelysin-2	P09238	0.0283945	0.041791	0.0174268	0.0358519	0.0239757	0.0318323	0.0283945	0.041791
CGA FSHB	3032-11	SL000428	FSH	Follicle stimulating hormone	P01215, P01225	0.0269443	0.0301661	0.0249856	0.0277051	0.0206628	0.0274683	0.0269443	0.0301661
C3	2683-1	SL000456	iC3b	Complement C3b, inactivated	P01024	0.164017	0.305351	0.0632422	0.0955766	0.13451	0.12535	0.164017	0.305351
LRPAP1	3640-14	SL005263	RAP	alpha-2-macroglobulin receptor-associated protein	P30533	0.0328295	0.0771522	0.0283365	0.04452	0.0193243	0.0823495	0.0328295	0.0771522
ESR1	2945-25	SL000007	ER	Estrogen receptor	P03372	0.0389825	0.0513582	0.0361913	0.0513304	0.042241	0.0508195	0.0389825	0.0513582
TNFRSF13B	2704-74	SL004364	TACI	Tumor necrosis factor receptor superfamily member 13B	O14836	0.0229469	0.0450528	0.0274857	0.0475432	0.0246611	0.0345473	0.0229469	0.0450528
BMPR2	4862-63	SL004133	BMP RII	Bone morphogenetic protein receptor type-2	Q13873	0.0208841	0.0622482	0.0220698	0.0575282	0.0231394	0.0492149	0.0208841	0.0622482
CNTN4	3298-52	SL010454	Contactin-4	Contactin-4	Q8IWV2	0.0182967	0.0806462	0.0134402	0.0275183	0.0125727	0.0216532	0.0182967	0.0806462
ANGPTL3	3281-19	SL006803	ANGL3	Angiopoietin-related protein 3	Q9Y5C1	0.0194113	0.326038	0.0158217	0.0294493	0.010081	0.0312382	0.0194113	0.326038
CDNF	4962-52	SL012538	ARMEL	Cerebral dopamine neurotrophic factor	Q49AH0	0.0144184	0.460423	0.011477	0.0314621	0.0125538	0.0336216	0.0144184	0.460423
SMAD2	10364-6	SL004101	SMAD2	Mothers against decapentaplegic homolog 2	Q15796	0.0186303	0.107776	0.0222871	0.042644	0.0279891	0.032886	0.0186303	0.107776
PDXK	11098-1	SL007953	PDXK	Pyridoxal kinase	O00764	0.026381	0.100743	0.0331495	0.0418603	0.0435094	0.0618631	0.026381	0.100743
BMP7	2972-57	SL004078	BMP-7	Bone morphogenetic protein 7	P18075	0.0256059	0.0325114	0.0294425	0.0465665	0.0367851	0.0397177	0.0256059	0.0325114
CHIT1	3600-2	SL006029	Chitotriosidase-1	Chitotriosidase-1	Q13231	0.0234534	0.0290817	0.0176238	0.0342356	0.0162018	0.0387278	0.0234534	0.0290817
PTHLH	2962-50	SL002561	PTHrP	Parathyroid hormone-related protein	P12272	0.0317343	0.0711502	0.0307444	0.086337	0.0276132	0.0356077	0.0317343	0.0711502
SMPDL3A	4771-10	SL012754	ASM3A	Acid sphingomyelinase-like phosphodiesterase 3a	Q92484	0.048243	0.0527207	0.0306546	0.0622691	0.0261341	0.054586	0.048243	0.0527207
PLAU	4158-54	SL000613	uPA	Urokinase-type plasminogen activator	P00749	0.0290838	0.023092	0.0251495	0.0378905	0.0207537	0.0395516	0.0290838	0.023092
FCER2	3291-30	SL002706	CD23	Low affinity immunoglobulin epsilon Fc receptor	P06734	0.0234261	0.0736622	0.0183914	0.0346115	0.0224903	0.0342387	0.0234261	0.0736622
BST1	4535-50	SL008644	BST1	ADP-ribosyl cyclase/cyclic ADP-ribose hydrolase 2	Q10588	0.0298305	0.10676	0.02981	0.0376359	0.0515067	0.0631991	0.0298305	0.10676
CST4	3802-50	SL007888	Cystatin-S	Cystatin-S	P01036	0.0717057	0.351119	0.0680597	0.101866	0.0576711	0.0670823	0.0717057	0.351119
OLFM4	4769-10	SL008590	Olfactomedin-4	Olfactomedin-4	Q6UX06	0.0211036	0.0552938	0.019178	0.0410136	0.0240554	0.0455615	0.0211036	0.0552938
CD48	3292-75	SL010450	CD48	CD48 antigen	P09326	0.0184198	0.0266092	0.0160482	0.0363939	0.0179745	0.0308604	0.0184198	0.0266092
NAGK	3894-15	SL005629	NAGK	N-acetyl-D-glucosamine kinase	Q9UJ70	0.0226619	0.0788398	0.024937	0.035638	0.0239124	0.0367001	0.0226619	0.0788398
IFNA10	14128-121	SL017106	IFN10	Interferon alpha-10	P01566	0.0211834	0.0656388	0.0374206	0.0379715	0.0200564	0.0288457	0.0211834	0.0656388
CHEK1	2853-68	SL006911	CHK1	Serine/threonine-protein kinase Chk1	O14757	0.0311472	0.0697977	0.0309058	0.0481162	0.0340756	0.0503393	0.0311472	0.0697977
CSF1R	2638-12	SL004153	M-CSF R	Macrophage colony-stimulating factor 1 receptor	P07333	0.079836	0.152934	0.0476698	0.0585676	0.0579918	0.0646904	0.079836	0.152934
TGFBR2	5133-17	SL002078	TGF-b R II	TGF-beta receptor type-2	P37173	0.0221019	0.259602	0.0207219	0.0296728	0.0195922	0.0385416	0.0221019	0.259602
POSTN	3457-57	SL005084	Periostin	Periostin	Q15063	0.0169041	0.0807934	0.0146197	0.0293012	0.0181065	0.0320413	0.0169041	0.0807934
SIGLEC1	4464-10	SL001753	Sialoadhesin	Sialoadhesin	Q9BZZ2	0.0362408	0.357773	0.0307056	0.0578523	0.0231026	0.0702004	0.0362408	0.357773
NLGN4X	5357-60	SL014113	NLGNX	Neuroligin-4, X-linked	Q8N0W4	0.0198904	0.0401867	0.0288465	0.054799	0.0140148	0.0421894	0.0198904	0.0401867
CRISP3	3187-52	SL007284	CRIS3	Cysteine-rich secretory protein 3	P54108	0.0221038	0.0962346	0.0125803	0.0481943	0.0319903	0.0512339	0.0221038	0.0962346
Human-virus	4792-51	SL016148	C34 gp41 HIV Fragment	gp41 C34 peptide, HIV	Q70626	0.0226996	0.0370097	0.0249032	0.0397444	0.0286799	0.0413747	0.0226996	0.0370097
MAPK11	5004-69	SL007453	MK11	Mitogen-activated protein kinase 11	Q15759	0.0163889	0.235375	0.0173226	0.0556929	0.015985	0.0359281	0.0163889	0.235375
WISP1	3057-55	SL004689	WISP-1	WNT1-inducible-signaling pathway protein 1	O95388	0.120898	0.129887	0.0924982	0.131439	0.105135	0.101199	0.120898	0.129887
RETN	3046-31	SL004260	resistin	Resistin	Q9HD89	0.0188507	0.16124	0.0353164	0.0525933	0.0243353	0.0308341	0.0188507	0.16124
FGFR2	3808-76	SL003990	FGFR-2	Fibroblast growth factor receptor 2	P21802	0.0264956	0.100163	0.0176904	0.0416092	0.0197382	0.037816	0.0264956	0.100163
HIPK3	3443-61	SL010523	HIPK3	Homeodomain-interacting protein kinase 3	Q9H422	0.0237893	0.0575418	0.0149343	0.0747567	0.0199207	0.0604652	0.0237893	0.0575418
CDK5 CDK5R1	3358-51	SL010496	CDK5/p35	Cyclin-dependent kinase 5:Cyclin-dependent kinase 5 activator 1 complex	Q00535 Q15078	0.0290502	0.132136	0.0272155	0.0465388	0.037491	0.0383417	0.0290502	0.132136
EPHB2	5077-28	SL007179	EPHB2	Ephrin type-B receptor 2	P29323	0.0234777	0.0363535	0.0155094	0.0379575	0.0319512	0.043506	0.0234777	0.0363535
PGM1	9173-21	SL008094	PGM1	Phosphoglucomutase-1	P36871	0.0255972	0.237725	0.0250904	0.0424363	0.0231664	0.0372993	0.0255972	0.237725
CST7	3302-58	SL007049	CYTF	Cystatin-F	O76096	0.0276042	0.136557	0.0195118	0.0371161	0.0233276	0.0288425	0.0276042	0.136557
CD36	2973-15	SL000668	CD36 ANTIGEN	Platelet glycoprotein 4	P16671	0.044255	0.0904983	0.0322497	0.0554054	0.0304073	0.055736	0.044255	0.0904983
CXCL5	2979-8	SL003169	ENA-78	C-X-C motif chemokine 5	P42830	0.0254168	0.0530664	0.0151808	0.0341138	0.0177784	0.0337409	0.0254168	0.0530664
FAM107A	2760-2	SL004752	DRR1	Protein FAM107A	O95990	0.0220527	0.0546829	0.0205111	0.0357294	0.0342824	0.0248841	0.0220527	0.0546829
AMH	4923-79	SL005201	MIS	Muellerian-inhibiting factor	P03971	0.0394081	0.0418163	0.0307371	0.0443079	0.0603395	0.0453313	0.0394081	0.0418163
S100A7	5921-58	SL004829	S100A7	Protein S100-A7	P31151	0.0216137	0.177254	0.0226094	0.0571144	0.0200695	0.0330455	0.0216137	0.177254
IL1RL1	4234-8	SL004146	IL-1 R4	Interleukin-1 receptor-like 1	Q01638	0.0322476	0.146553	0.0226049	0.04509	0.0398953	0.0619611	0.0322476	0.146553
CTSV	3364-76	SL006910	Cathepsin V	Cathepsin L2	O60911	0.0204796	0.255695	0.0318913	0.0337027	0.034625	0.0332536	0.0204796	0.255695
GHRL	8447-11	SL004269	ghrelin	Appetite-regulating hormone	Q9UBU3	0.0230698	0.0627597	0.0172364	0.0366447	0.0246621	0.0303907	0.0230698	0.0627597
CYCS	2942-50	SL000396	Cytochrome c	Cytochrome c	P99999	0.0164711	0.0937572	0.0183389	0.0297242	0.0152903	0.0321864	0.0164711	0.0937572
CST1	5459-33	SL010456	CYTN	Cystatin-SN	P01037	0.0393921	0.533339	0.0294042	0.0530561	0.0382006	0.0492819	0.0393921	0.533339
WNT7A	4889-82	SL009951	WNT7A	Protein Wnt-7a	O00755	0.0253487	0.100706	0.0295328	0.0435644	0.0192581	0.0401298	0.0253487	0.100706
NTF3	4145-58	SL004359	Neurotrophin-3	Neurotrophin-3	P20783	0.0363394	0.21513	0.0287931	0.0574371	0.0266229	0.0419438	0.0363394	0.21513
GFAP	3034-1	SL004271	GFAP	Glial fibrillary acidic protein	P14136	0.023907	0.0178012	0.0182823	0.028526	0.0153013	0.030703	0.023907	0.0178012
FAS	5392-73	SL002731	Fas, soluble	Tumor necrosis factor receptor superfamily member 6	P25445	0.0424329	0.104611	0.0470978	0.0804753	0.0381517	0.0533345	0.0424329	0.104611
CSF3R	2719-3	SL004591	G-CSF-R	Granulocyte colony-stimulating factor receptor	Q99062	0.10545	0.156983	0.0503882	0.0782297	0.0862356	0.0991219	0.10545	0.156983
PEBP1	4276-10	SL005358	prostatic binding protein	Phosphatidylethanolamine-binding protein 1	P30086	0.0243582	0.0689891	0.0322	0.0326962	0.0249763	0.0320431	0.0243582	0.0689891
PON1	4261-55	SL005493	paraoxonase 1	Serum paraoxonase/arylesterase 1	P27169	0.0239282	0.0929452	0.0177701	0.0767359	0.0263089	0.0431562	0.0239282	0.0929452
CRLF1 CLCF1	2607-54	SL004692	CLF-1/CLC Complex	Cytokine receptor-like factor 1:Cardiotrophin-like cytokine factor 1 Complex	O75462 Q9UBD9	0.0299425	0.140112	0.0201844	0.040425	0.0155402	0.0363548	0.0299425	0.140112
CAMK2A	3350-53	SL010491	CAMK2A	Calcium/calmodulin-dependent protein kinase type II subunit alpha	Q9UQM7	0.0272827	0.0724443	0.0178511	0.0496885	0.0294557	0.0505275	0.0272827	0.0724443
MAPKAPK2	3820-68	SL010503	MAPK2	MAP kinase-activated protein kinase 2	P49137	0.0204278	0.145882	0.0227728	0.0443947	0.0227836	0.0425862	0.0204278	0.145882
C3	4900-8	SL000313	C3a	C3a anaphylatoxin	P01024	0.312887	0.725137	0.0958834	1.57236	0.196983	0.138166	0.312887	0.725137
HAT1	2858-29	SL004725	Hat1	Histone acetyltransferase type B catalytic subunit	O14929	0.0299076	0.598952	0.0331892	0.0301439	0.0264055	0.0309946	0.0299076	0.598952
HIBADH	4693-72	SL008085	3HIDH	3-hydroxyisobutyrate dehydrogenase, mitochondrial	P31937	0.0233891	0.130548	0.0196188	0.0346277	0.0156226	0.0364721	0.0233891	0.130548
BSG	3585-54	SL009341	BASI	Basigin	P35613	0.0474943	0.0412389	0.0222711	0.0562314	0.024307	0.0770271	0.0474943	0.0412389
NCK1	5014-49	SL006091	NCK1	Cytoplasmic protein NCK1	P16333	0.0161055	0.0201696	0.0223533	0.0277548	0.0113356	0.0249775	0.0161055	0.0201696
DLL1	5349-69	SL006970	DLL1	Delta-like protein 1	O00548	0.0185797	0.0337544	0.0204078	0.034269	0.0243245	0.0288149	0.0185797	0.0337544
IL10	2773-50	SL001717	IL-10	Interleukin-10	P22301	0.0241084	0.0983998	0.0249682	0.0363373	0.0241639	0.0618352	0.0241084	0.0983998
PROC	3758-68	SL003974	Activated Protein C	Activated Protein C	P04070	0.0217096	0.0580638	0.014246	0.0402885	0.0114869	0.0589769	0.0217096	0.0580638
LYPD3	13107-9	SL008402	LYPD3	Ly6/PLAUR domain-containing protein 3	O95274	0.0248062	0.0449149	0.0208207	0.0460032	0.0178335	0.0433244	0.0248062	0.0449149
KIR3DS1	5097-14	SL014289	KI3S1	Killer cell immunoglobulin-like receptor 3DS1	Q14943	0.0215921	0.0397956	0.0225548	0.034717	0.0171524	0.0327738	0.0215921	0.0397956
CTSA	3179-51	SL009213	Cathepsin A	Lysosomal protective protein	P10619	0.0164363	0.0649347	0.0194247	0.0270825	0.0121208	0.0220017	0.0164363	0.0649347
INHBA	2748-3	SL001938	Activin A	Inhibin beta A chain	P08476	0.0231503	0.0669974	0.0174687	0.0296192	0.018344	0.0390832	0.0231503	0.0669974
CFC1	3294-55	SL010451	CFC1	Cryptic protein	P0CG37	0.0262731	0.029003	0.0409184	0.0485157	0.038828	0.0369613	0.0262731	0.029003
DKK3	3607-71	SL009412	DKK3	Dickkopf-related protein 3	Q9UBP4	0.0233488	0.0506938	0.026139	0.0469802	0.0295131	0.0312602	0.0233488	0.0506938
HP	3054-3	SL000437	Haptoglobin, Mixed Type	Haptoglobin	P00738	0.0477727	0.24277	0.0181936	0.0481238	0.0184139	0.085822	0.0477727	0.24277
CHEK2	3360-50	SL003726	Chk2	Serine/threonine-protein kinase Chk2	O96017	0.0293249	0.0526649	0.0178207	0.0764948	0.020714	0.0767712	0.0293249	0.0526649
PRTN3	3514-49	SL004008	Proteinase-3	Myeloblastin	P24158	0.0157808	0.0530935	0.0158085	0.0378677	0.0208624	0.0280154	0.0157808	0.0530935
CD97	2822-56	SL004726	CD97	CD97 antigen	P48960	0.0319048	0.0638296	0.0153732	0.0394249	0.0318871	0.0489755	0.0319048	0.0638296
KLK6	3450-4	SL001797	Kallikrein 6	Kallikrein-6	Q92876	0.0306447	0.05612	0.0102566	0.0602696	0.0123484	0.0459082	0.0306447	0.05612
NPPB	7655-11	SL002785	N-terminal pro-BNP	N-terminal pro-BNP	P16860	0.0222395	0.251823	0.0233735	0.0460446	0.0296379	0.0453961	0.0222395	0.251823
CAMK2B	3351-1	SL010492	CAMK2B	Calcium/calmodulin-dependent protein kinase type II subunit beta	Q13554	0.0282093	0.049819	0.0157255	0.0416912	0.0383459	0.0570264	0.0282093	0.049819
JUN	10356-21	SL000455	c-Jun	Transcription factor AP-1	P05412	0.0454551	0.124661	0.0317303	0.0850167	0.0311992	0.046981	0.0454551	0.124661
TLR4 LY96	3647-49	SL018625	TLR4:MD-2 complex	Toll-like receptor 4:Lymphocyte antigen 96 complex	O00206 Q9Y6Y9	0.0349144	0.0813201	0.0254478	0.0528747	0.033812	0.049331	0.0349144	0.0813201
HAVCR2	5134-52	SL007547	TIMD3	Hepatitis A virus cellular receptor 2	Q8TDQ0	0.0445294	0.130787	0.0262215	0.0532758	0.0303645	0.0387293	0.0445294	0.130787
REG1A	13095-51	SL005357	PSP	Lithostathine-1-alpha	P05451	0.0872115	0.113697	0.0535297	0.130041	0.0465733	0.0995128	0.0872115	0.113697
C7	2888-49	SL000323	C7	Complement component C7	P10643	0.047135	0.120365	0.0275386	0.0402622	0.0336451	0.0438179	0.047135	0.120365
JAG1	5092-51	SL007328	JAG1	Protein jagged-1	P78504	0.0302623	0.0240396	0.0152015	0.0346676	0.0401425	0.0460107	0.0302623	0.0240396
TMPRSS15	3189-61	SL010372	Enterokinase	Enteropeptidase	P98073	0.0224983	0.80139	0.0213854	0.0807499	0.0189431	0.0395295	0.0224983	0.80139
SFRP1	3221-54	SL003770	SARP-2	Secreted frizzled-related protein 1	Q8N474	0.0286088	0.136817	0.0300137	0.0364834	0.0216201	0.0351917	0.0286088	0.136817
CDC2 CCNB1	3422-4	SL010494	CDK1/cyclin B	Cyclin-dependent kinase 1:G2/mitotic-specific cyclin-B1 complex	P06493 P14635	0.0204201	0.0528904	0.0241678	0.045242	0.0234821	0.0389937	0.0204201	0.0528904
TNFSF15	2968-61	SL004686	TNFSF15	Tumor necrosis factor ligand superfamily member 15	O95150	0.0393484	0.0873214	0.0377962	0.0580703	0.0837722	0.0880751	0.0393484	0.0873214
SRC	5488-74	SL010516	SRCN1	Proto-oncogene tyrosine-protein kinase Src	P12931	0.0541194	0.210304	0.0370561	0.0576756	0.0384741	0.0614	0.0541194	0.210304
RPS27A	2846-24	SL000605	Ubiquitin+1	Ubiquitin+1, truncated mutation for UbB	P62979	0.036762	0.0671654	0.0364401	0.0476392	0.0407097	0.0333869	0.036762	0.0671654
IL36B	14149-9	SL005179	IL-1F8	Interleukin-36 beta	Q9NZH7	0.0131001	0.49913	0.0194233	0.031687	0.0192566	0.0317703	0.0131001	0.49913
LRP1B	7640-29	SL013872	LRP1B	Low-density lipoprotein receptor-related protein 1B	Q9NZR2	0.0865806	0.135363	0.0290813	0.0821177	0.0394697	0.0344228	0.0865806	0.135363
PAK3	3387-1	SL010508	PAK3	Serine/threonine-protein kinase PAK 3	O75914	0.0376296	0.161403	0.0405103	0.0626473	0.0578386	0.0494708	0.0376296	0.161403
ACVR1B	2806-49	SL004128	Activin RIB	Activin receptor type-1B	P36896	0.0441211	0.0687141	0.0267532	0.0522639	0.0271891	0.0490692	0.0441211	0.0687141
TGM3	4471-50	SL008945	TGM3	Protein-glutamine gamma-glutamyltransferase E	Q08188	0.0727641	0.616736	0.197502	0.342495	0.0819544	1.08541	0.0727641	0.616736
CGA CGB	4914-10	SL001766	HCG	Human Chorionic Gonadotropin	P01215,P01233	0.0144729	0.221036	0.0174492	0.0358228	0.0167638	0.0341387	0.0144729	0.221036
F2	4157-2	SL000586	Thrombin	Thrombin	P00734	0.0439627	0.0535304	0.0351774	0.049065	0.0369168	0.0397422	0.0439627	0.0535304
CD55	5069-9	SL004556	DAF	Complement decay-accelerating factor	P08174	0.0218665	0.034596	0.0179403	0.0342285	0.0385846	0.0486118	0.0218665	0.034596
SPOCK2	5491-12	SL010471	Testican-2	Testican-2	Q92563	0.0264503	0.0700125	0.0151868	0.0265693	0.0119467	0.0384716	0.0264503	0.0700125
CNDP2	3192-3	SL002695	Glutamate carboxypeptidase	Cytosolic non-specific dipeptidase	Q96KP4	0.0254207	0.0382964	0.0155396	0.0383739	0.023741	0.0381804	0.0254207	0.0382964
TGFB1	2333-72	SL000584	TGF-b1	Transforming growth factor beta-1	P01137	0.0169812	0.320655	0.0289926	0.039582	0.0188914	0.0284937	0.0169812	0.320655
IL23R	5088-175	SL005185	IL-23 R	Interleukin-23 receptor	Q5VWK5	0.0225756	0.0872059	0.0140482	0.0341069	0.0233289	0.0406155	0.0225756	0.0872059
BCAM	2816-50	SL001902	BCAM	Basal Cell Adhesion Molecule	P50895	0.0274901	0.128069	0.0228095	0.0547102	0.032403	0.0529019	0.0274901	0.128069
IL6ST	2620-4	SL003872	gp130, soluble	Interleukin-6 receptor subunit beta	P40189	0.0201497	0.0621395	0.0144575	0.0306705	0.0518728	0.0484071	0.0201497	0.0621395
NRXN1	5110-84	SL009054	NRX1B	Neurexin-1-beta	P58400	0.0221212	0.038731	0.0333061	0.031453	0.0281655	0.0316157	0.0221212	0.038731
NRXN3	5111-15	SL008728	NRX3B	Neurexin-3-beta	Q9HDB5	0.0180402	0.0278865	0.0156273	0.0315907	0.0137232	0.0285562	0.0180402	0.0278865
IL27 EBI3	2829-19	SL006915	IL-27	Interleukin-27	Q8NEV9 Q14213	0.0243611	0.0346234	0.0212328	0.0338543	0.0188976	0.0317318	0.0243611	0.0346234
EPOR	2715-25	SL005159	EPO-R	Erythropoietin receptor	P19235	0.0259772	0.104599	0.0194802	0.0392799	0.0266523	0.0421102	0.0259772	0.104599
VWF	3050-7	SL000017	vWF	von Willebrand factor	P04275	0.188634	0.260409	0.0682974	0.134823	0.10087	0.146358	0.188634	0.260409
IGHE IGK@ IGL@	4135-84	SL000461	IgE	Immunoglobulin E	P01854	0.0196166	0.309381	0.0212756	0.0265732	0.0227481	0.0215779	0.0196166	0.309381
AIF1	2849-49	SL004768	AIF1	Allograft inflammatory factor 1	P55008	0.0312717	0.103324	0.0265725	0.044059	0.034436	0.0394674	0.0312717	0.103324
SEMA6B	5121-3	SL014248	SEM6B	Semaphorin-6B	Q9H3T3	0.047323	0.0799168	0.0496079	0.0875998	0.0835605	0.107542	0.047323	0.0799168
C3	4480-59	SL000314	C3b	Complement C3b	P01024	0.0776862	0.123814	0.0529141	0.0885889	0.109917	0.152168	0.0776862	0.123814
PPA1	5021-13	SL004914	PPase	Inorganic pyrophosphatase	Q15181	0.0666783	0.10436	0.0341981	0.0480834	0.0304172	0.0458362	0.0666783	0.10436
FGF5	3065-65	SL004339	FGF-5	Fibroblast growth factor 5	P12034	0.0245984	0.103794	0.0414166	0.0654477	0.0338514	0.0539589	0.0245984	0.103794
ANXA2	4961-17	SL004209	annexin II	Annexin A2	P07355	0.0256561	0.0375525	0.0319594	0.0295335	0.021224	0.0428282	0.0256561	0.0375525
XCL1	4143-74	SL003186	Lymphotactin	Lymphotactin	P47992	0.0283117	0.0321439	0.0293098	0.101612	0.0268653	0.103525	0.0283117	0.0321439
CD244	5063-12	SL014188	CD244	Natural killer cell receptor 2B4	Q9BZW8	0.0286203	0.0996567	0.0300173	0.0364487	0.0330864	0.0353746	0.0286203	0.0996567
HPX	2768-56	SL000440	Hemopexin	Hemopexin	P02790	0.072592	0.100734	0.0303315	0.106704	0.0396755	0.108694	0.072592	0.100734
GSTA3	4993-16	SL000670	GSTA3	Glutathione S-transferase A3	Q16772	0.0652216	0.0694931	0.0613265	0.0862081	0.0578966	0.0714167	0.0652216	0.0694931
SECTM1	13093-6	SL005430	SECTM1	Secreted and transmembrane protein 1	Q8WVN6	0.0247241	0.091294	0.0236424	0.0313281	0.0339393	0.0422888	0.0247241	0.091294
VEGFA	4867-15	SL003310	VEGF121	Vascular endothelial growth factor A, isoform 121	P15692	0.0269319	0.225959	0.0289742	0.0537366	0.0166116	0.0404084	0.0269319	0.225959
PPIB	4718-5	SL007869	PPIB	Peptidyl-prolyl cis-trans isomerase B	P23284	0.0373952	0.0411637	0.0232803	0.0481219	0.0245128	0.052527	0.0373952	0.0411637
HGF	2681-23	SL000441	HGF	Hepatocyte growth factor	P14210	0.0214715	0.269482	0.0126015	0.0452498	0.0180809	0.0533665	0.0214715	0.269482
NPPA	5443-62	SL002505	ANP	Atrial natriuretic factor	P01160	0.0224618	0.0296383	0.0246044	0.0464512	0.010994	0.0406869	0.0224618	0.0296383
STAB2	3399-31	SL007560	STAB2	Stabilin-2	Q8WWQ8	0.0347629	0.0419207	0.0218356	0.0392022	0.0359347	0.0389846	0.0347629	0.0419207
KAT6A	2865-77	SL004724	MOZ	Histone acetyltransferase KAT6A	Q92794	0.0293887	0.0435241	0.0206172	0.044672	0.0267761	0.0327515	0.0293887	0.0435241
TNFSF14	5355-69	SL004648	LIGHT	Tumor necrosis factor ligand superfamily member 14	O43557	0.0218628	0.0654091	0.0120858	0.0379932	0.0214954	0.034875	0.0218628	0.0654091
TXNDC12	4815-25	SL016128	TXD12	Thioredoxin domain-containing protein 12	O95881	0.0209658	0.110227	0.0198658	0.0253979	0.0242468	0.0212457	0.0209658	0.110227
CLEC11A	4500-50	SL004363	SCGF-alpha	Stem cell growth factor-alpha	Q9Y240	0.0179785	0.0772509	0.0153555	0.0270285	0.0220075	0.0315056	0.0179785	0.0772509
TPM2	4472-5	SL004908	Tropomyosin 2	Tropomyosin beta chain	P07951	0.0400093	0.101062	0.0326295	0.0569082	0.0508556	0.040907	0.0400093	0.101062
KLK7	3378-49	SL000064	Kallikrein 7	Kallikrein-7	P49862	0.0286346	0.0844667	0.0201871	0.118248	0.0296093	0.0642103	0.0286346	0.0844667
JAK2	4998-50	SL007025	JAK2	Tyrosine-protein kinase JAK2	O60674	0.0933309	0.088081	0.0814831	0.0925776	0.0713884	0.0901826	0.0933309	0.088081
DIABLO	3122-6	SL003733	SMAC	Diablo homolog, mitochondrial	Q9NR28	0.0273277	0.139584	0.0227151	0.0407761	0.0315932	0.0441911	0.0273277	0.139584
ADCYAP1	8446-4	SL011508	PACAP-27	Pituitary adenylate cyclase-activating polypeptide 27	P18509	0.0506615	0.0981192	0.0426223	0.0780123	0.0450199	0.043681	0.0506615	0.0981192
HCK	3374-49	SL010499	HCK	Tyrosine-protein kinase HCK	P08631	0.0249072	0.180633	0.0184021	0.0409233	0.0254374	0.0253722	0.0249072	0.180633
IL36A	14150-7	SL005177	IL-1F6	Interleukin-36 alpha	Q9UHA7	0.262391	0.463448	0.295261	0.24769	0.262417	0.173621	0.262391	0.463448
TIMP1	2211-9	SL000591	TIMP-1	Metalloproteinase inhibitor 1	P01033	0.10606	0.238353	0.0271508	0.0726914	0.0239694	0.0440633	0.10606	0.238353
BCAN	3461-58	SL009089	PGCB	Brevican core protein	Q96GW7	0.026299	0.057613	0.0258466	0.0367488	0.0294606	0.0283153	0.026299	0.057613
UNC5C	5139-32	SL005230	UNC5H3	Netrin receptor UNC5C	O95185	0.0142341	0.0301849	0.0144484	0.0279836	0.0112952	0.0242927	0.0142341	0.0301849
SIGLEC9	3007-7	SL005219	Siglec-9	Sialic acid-binding Ig-like lectin 9	Q9Y336	0.0416398	0.243906	0.0152297	0.0407448	0.0237253	0.0334395	0.0416398	0.243906
Human-virus	2623-54	SL004697	HPV E7 Type 16	Protein E7_HPV16	P03129	0.0606324	0.0717195	0.0450545	0.0848535	0.0192966	0.0440779	0.0606324	0.0717195
IL17RD	3376-49	SL010613	IL-17 RD	Interleukin-17 receptor D	Q8NFM7	0.0261564	0.026641	0.025897	0.0345718	0.0168254	0.033204	0.0261564	0.026641
PKM2	4240-31	SL002650	M2-PK	Pyruvate kinase PKM	P14618	0.034885	0.187321	0.0410217	0.0990617	0.0703079	0.0543905	0.034885	0.187321
MSLN	3893-64	SL001905	Mesothelin	Mesothelin	Q13421	0.0240573	0.0386667	0.0189728	0.0696025	0.0168844	0.0726606	0.0240573	0.0386667
IDE	3197-70	SL007122	IDE	Insulin-degrading enzyme	P14735	0.0151612	0.0996961	0.0151814	0.0214082	0.0197391	0.0445754	0.0151612	0.0996961
NCR2	2734-49	SL005206	NKp44	Natural cytotoxicity triggering receptor 2	O95944	0.0242673	0.0434284	0.0244626	0.0444666	0.0282315	0.0370235	0.0242673	0.0434284
POMC	4890-10	SL003461	ACTH	Corticotropin	P01189	0.0205192	0.171141	0.0251689	0.0284124	0.0330735	0.0350091	0.0205192	0.171141
PDCD1LG2	3004-67	SL004862	PD-L2	Programmed cell death 1 ligand 2	Q9BQ51	0.031855	0.0815632	0.042821	0.0386332	0.0277456	0.0446671	0.031855	0.0815632
CCL16	4913-78	SL003300	HCC-4	C-C motif chemokine 16	O15467	0.0286797	0.0495667	0.0164353	0.0385831	0.0264911	0.040565	0.0286797	0.0495667
REG4	11102-22	SL012561	REG4	Regenerating islet-derived protein 4	Q9BYZ8	0.0255764	0.158823	0.021384	0.0388571	0.0563363	0.073018	0.0255764	0.158823
OCIAD1	3635-76	SL010530	OCAD1	OCIA domain-containing protein 1	Q9NX40	0.017005	0.0520711	0.0173661	0.0329969	0.0147417	0.0548997	0.017005	0.0520711
CCL22	3508-78	SL003187	MDC	C-C motif chemokine 22	O00626	0.0465671	0.144775	0.038588	0.0933554	0.052594	0.0515471	0.0465671	0.144775
LTA LTB	3506-49	SL000508	Lymphotoxin a2/b1	Lymphotoxin alpha2:beta1	P01374, Q06643	0.0227925	0.136463	0.0647279	0.05845	0.027546	0.039185	0.0227925	0.136463
FN1	3435-53	SL010348	FN1.4	Fibronectin Fragment 4	P02751	0.0522744	0.0476307	0.0663166	0.0934716	0.065897	0.0772398	0.0522744	0.0476307
LBP	3074-6	SL003309	LBP	Lipopolysaccharide-binding protein	P18428	0.0497947	0.12949	0.0390631	0.084394	0.049073	0.0736443	0.0497947	0.12949
CGA LHB	2953-31	SL000506	Luteinizing hormone	Luteinizing hormone	P01215, P01229	0.0308889	0.252623	0.0247078	0.0429653	0.0379523	0.0404542	0.0308889	0.252623
CD27	5412-53	SL004134	CD27	CD27 antigen	P26842	0.0838401	0.0689322	0.0574261	0.0942822	0.0712285	0.11384	0.0838401	0.0689322
POR	2731-29	SL000528	NADPH-P450 Oxidoreductase	NADPH--cytochrome P450 reductase	P16435	0.0196161	0.208829	0.015669	0.028566	0.0152053	0.0265232	0.0196161	0.208829
TYMS	5035-7	SL000142	TS	Thymidylate synthase	P04818	0.0141916	0.07961	0.0480931	0.0864279	0.0327983	0.0365813	0.0141916	0.07961
PDE11A	5252-33	SL016555	PDE11	Dual 3',5'-cyclic-AMP and -GMP phosphodiesterase 11A	Q9HCR9	0.0159795	0.0463707	0.0210254	0.0248861	0.0308187	0.0289382	0.0159795	0.0463707
TNFSF8	3421-54	SL004635	CD30 Ligand	Tumor necrosis factor ligand superfamily member 8	P32971	0.0211455	0.0739201	0.0231004	0.0310551	0.0230763	0.0320356	0.0211455	0.0739201
RGMB	3331-8	SL010468	RGMB	RGM domain family member B	Q6NW40	0.0158961	0.0227157	0.0133318	0.0280891	0.0174307	0.0297026	0.0158961	0.0227157
PECAM1	2695-25	SL001721	PECAM-1	Platelet endothelial cell adhesion molecule	P16284	0.0146474	0.0376787	0.00843741	0.0311516	0.018707	0.0354439	0.0146474	0.0376787
DDC	3538-26	SL009216	dopa decarboxylase	Aromatic-L-amino-acid decarboxylase	P20711	0.0433915	0.127281	0.0196828	0.0263482	0.0202709	0.0374187	0.0433915	0.127281
GPC3	4842-62	SL000070	Glypican 3	Glypican-3	P51654	0.0266005	0.0757527	0.0206415	0.0528233	0.0242628	0.0413274	0.0266005	0.0757527
EPHA10	5076-53	SL014294	EPHAA	Ephrin type-A receptor 10	Q5JZY3	0.0394153	0.0789412	0.0426603	0.0743742	0.040696	0.0435034	0.0394153	0.0789412
IL3	4717-55	SL000479	IL-3	Interleukin-3	P08700	0.027321	0.0231734	0.0159363	0.0403009	0.0175995	0.0957537	0.027321	0.0231734
ULBP3	2747-3	SL005229	ULBP-3	NKG2D ligand 3	Q9BZM4	0.026392	0.0589009	0.0122743	0.0408461	0.0241606	0.0549516	0.026392	0.0589009
HMOX2	2622-18	SL004751	HO-2	Heme oxygenase 2	P30519	0.0133243	0.138026	0.0141091	0.0321255	0.0208155	0.031572	0.0133243	0.138026
EFNB3	2514-65	SL004142	Ephrin-B3	Ephrin-B3	Q15768	0.0143032	0.0227458	0.0198046	0.0293102	0.0169704	0.0268192	0.0143032	0.0227458
TG	4165-2	SL000587	Thyroglobulin	Thyroglobulin	P01266	0.0294029	0.0679482	0.0216113	0.0346447	0.0204094	0.066458	0.0294029	0.0679482
OMD	5358-3	SL008574	OMD	Osteomodulin	Q99983	0.0202087	0.0239536	0.0191972	0.0304668	0.0186131	0.0251497	0.0202087	0.0239536
GAS1	5463-22	SL000658	GAS1	Growth arrest-specific protein 1	P54826	0.0178741	0.100099	0.0262406	0.0337098	0.0205186	0.0338453	0.0178741	0.100099
ITGA1 ITGB1	3503-4	SL003179	Integrin a1b1	Integrin alpha-I: beta-1 complex	P56199, P05556	0.0332667	0.0406516	0.0251704	0.0474933	0.0288333	0.0343399	0.0332667	0.0406516
FN1	4131-72	SL000426	Fibronectin	Fibronectin	P02751	0.079301	0.119179	0.0410639	0.153575	0.0491247	0.0902789	0.079301	0.119179
FN1	3434-34	SL010349	FN1.3	Fibronectin Fragment 3	P02751	0.12057	0.119802	0.0365694	0.158961	0.0576703	0.0977264	0.12057	0.119802
PGLYRP1	3329-14	SL004515	PGRP-S	Peptidoglycan recognition protein 1	O75594	0.0323704	0.0931355	0.0324897	0.0488752	0.0383654	0.0545513	0.0323704	0.0931355
IL7R	5089-11	SL005189	IL-7 Ra	Interleukin-7 receptor subunit alpha	P16871	0.0216884	0.180971	0.0119452	0.0789753	0.0198919	0.0637116	0.0216884	0.180971
PAK7	3388-58	SL010510	PAK7	Serine/threonine-protein kinase PAK 7	Q9P286	0.0262925	0.0606167	0.0182608	0.0301286	0.0191625	0.0314098	0.0262925	0.0606167
ANG	4874-3	SL000003	Angiogenin	Angiogenin	P03950	0.0645882	0.0490026	0.0286535	0.0606701	0.0160409	0.0759806	0.0645882	0.0490026
ADAMTS5	3168-8	SL004626	ADAMTS-5	A disintegrin and metalloproteinase with thrombospondin motifs 5	Q9UNA0	0.0250237	0.175284	0.0173872	0.037327	0.0201148	0.0352692	0.0250237	0.175284
EPHA1	3431-54	SL004137	EphA1	Ephrin type-A receptor 1	P21709	0.0346776	0.142283	0.0216771	0.0363626	0.035639	0.0409232	0.0346776	0.142283
TNFRSF4	3730-81	SL011448	TNR4	Tumor necrosis factor receptor superfamily member 4	P43489	0.0909674	0.107234	0.0539518	0.0858851	0.0423107	0.0518177	0.0909674	0.107234
FER	4220-39	SL005588	FER	Tyrosine-protein kinase Fer	P16591	0.0500199	0.17932	0.0334139	0.082842	0.0380556	0.0690061	0.0500199	0.17932
C5	2381-52	SL000319	C5	Complement C5	P01031	0.0367406	0.0452699	0.0256345	0.0726949	0.0310004	0.10335	0.0367406	0.0452699
PRSS27	3624-3	SL011069	Marapsin	Serine protease 27	Q9BQR3	0.0421488	0.0497912	0.0228986	0.0437002	0.0262224	0.0758065	0.0421488	0.0497912
TSLP	3010-53	SL004687	TSLP	Thymic stromal lymphopoietin	Q969D9	0.0226662	0.0615376	0.0237438	0.0367078	0.0158512	0.0240096	0.0226662	0.0615376
SOD2	5008-51	SL001815	Mn SOD	Superoxide dismutase [Mn], mitochondrial	P04179	0.050981	0.0443015	0.0505245	0.0777458	0.0451336	0.0554092	0.050981	0.0443015
TIE1	2844-53	SL003199	sTie-1	Tyrosine-protein kinase receptor Tie-1, soluble	P35590	0.0304864	0.0354491	0.028735	0.0320038	0.024908	0.0303683	0.0304864	0.0354491
PIK3CA PIK3R1	3390-72	SL010512	PIK3CA/PIK3R1	PIK3CA/PIK3R1	P42336 P27986	0.0275657	0.0558677	0.0150883	0.0293916	0.0127721	0.0409963	0.0275657	0.0558677
FGFR3	3809-1	SL004063	FGFR-3	Fibroblast growth factor receptor 3	P22607	0.0308371	0.048527	0.0306637	0.0389156	0.0295325	0.049585	0.0308371	0.048527
BMX	3414-40	SL006374	BMX	Cytoplasmic tyrosine-protein kinase BMX	P51813	0.0302355	0.0533048	0.0221777	0.0412089	0.0169328	0.0454246	0.0302355	0.0533048
TNFRSF21	5404-53	SL004871	DR6	Tumor necrosis factor receptor superfamily member 21	O75509	0.0199814	0.0271368	0.0139369	0.030255	0.0159309	0.0329551	0.0199814	0.0271368
TNFRSF13C	5383-14	SL004671	BAFF Receptor	Tumor necrosis factor receptor superfamily member 13C	Q96RJ3	0.0235014	0.0706167	0.0189535	0.0401177	0.0230268	0.0344278	0.0235014	0.0706167
CCL8	2785-15	SL000515	MCP-2	C-C motif chemokine 8	P80075	0.0193609	0.0528941	0.020594	0.0348137	0.0242941	0.0279655	0.0193609	0.0528941
CD83	5065-8	SL014229	CD83	CD83 antigen	Q01151	0.0782515	0.181631	0.0595249	0.102195	0.0779675	0.0731904	0.0782515	0.181631
ACE2	2805-6	SL004415	ACE2	Angiotensin-converting enzyme 2	Q9BYF1	0.0227911	0.0989141	0.0109623	0.0316178	0.0255476	0.0329197	0.0227911	0.0989141
CCL4L1	2781-63	SL004356	LAG-1	C-C motif chemokine 4-like	Q8NHW4	0.0321383	0.045822	0.0116607	0.0297256	0.0357076	0.0539854	0.0321383	0.045822
IL18BP	3073-51	SL002508	IL-18 BPa	Interleukin-18-binding protein	O95998	0.0442385	0.0732073	0.0576451	0.0684497	0.048269	0.048575	0.0442385	0.0732073
FGF9	2764-20	SL003849	FGF9	Fibroblast growth factor 9	P31371	0.0155738	0.0660584	0.017796	0.0465166	0.0161917	0.0639542	0.0155738	0.0660584
RELT	5115-31	SL005213	RELT	Tumor necrosis factor receptor superfamily member 19L	Q969Z4	0.0193707	0.178478	0.0111813	0.0397084	0.0500104	0.0678873	0.0193707	0.178478
CBX5	4540-11	SL009768	CBX5	Chromobox protein homolog 5	P45973	0.0311275	0.0891522	0.0171183	0.034646	0.0278804	0.0350133	0.0311275	0.0891522
IGFBP6	2686-67	SL005172	IGFBP-6	Insulin-like growth factor-binding protein 6	P24592	0.0558903	0.0689712	0.0247301	0.0544222	0.0350993	0.0448497	0.0558903	0.0689712
PLCG1	4563-61	SL012108	PLCG1	1-phosphatidylinositol 4,5-bisphosphate phosphodiesterase gamma-1	P19174	0.025677	0.0490331	0.0225833	0.0288821	0.0158227	0.036375	0.025677	0.0490331
AURKA	3091-70	SL004771	Aurora kinase A	Aurora kinase A	O14965	0.0281201	0.158655	0.0343176	0.0515164	0.0240315	0.0441685	0.0281201	0.158655
ADM	14115-34	SL002782	Adrenomedullin	Adrenomedullin	P35318	0.02515	0.08304	0.0403075	0.0371341	0.0301376	0.0367145	0.02515	0.08304
CST3	2609-59	SL001777	Cystatin C	Cystatin-C	P01034	0.0353521	0.0628311	0.0229423	0.0851267	0.022587	0.0373257	0.0353521	0.0628311
CD86	5337-64	SL004131	B7-2	T-lymphocyte activation antigen CD86	P42081	0.023897	0.0739573	0.0140542	0.0466011	0.0239662	0.0446017	0.023897	0.0739573
SERPINE1	2925-9	SL000006	PAI-1	Plasminogen activator inhibitor 1	P05121	0.0375853	0.305791	0.0318244	0.0492005	0.0296481	0.0436409	0.0375853	0.305791
COLEC12	5457-5	SL007471	COLEC12	Collectin-12	Q5KU26	0.0335363	0.0957714	0.0353757	0.0451362	0.0325683	0.0370457	0.0335363	0.0957714
CTF1	2889-37	SL002783	Cardiotrophin-1	Cardiotrophin-1	Q16619	0.0237003	0.057218	0.011964	0.0254362	0.0193739	0.0283303	0.0237003	0.057218
LAYN	2635-61	SL004646	Layilin	Layilin	Q6UX15	0.0196614	0.0363054	0.0157494	0.036057	0.0186782	0.0215288	0.0196614	0.0363054
GDF15	4374-45	SL003869	MIC-1	Growth/differentiation factor 15	Q99988	0.0332232	0.0379268	0.0280918	0.0413988	0.0223692	0.0375406	0.0332232	0.0379268
EEF1B2	5882-34	SL005685	EF-1-beta	Elongation factor 1-beta	P24534	0.0188388	0.102536	0.0164792	0.0395514	0.0295958	0.0480416	0.0188388	0.102536

## Sheet: Supp Tbl3
Supplemental Table 3. Baseline clinical characteristics of JHS subjects that were and were not inlcuded in the incident T2D analyses.
	Incident Diabetes Proteomics Subcohort	Non-profiled Subcohort
n	1313	2751
Female, n (%)	799 (61%)	1747 (64%)
Age, yrs	53.3 (12.4)	53.3 (13.3)
BMI, kg/m2	31.0 (6.9)	31.1 (7.2)
Waist Circumference, cm	98.7 (15.9)	98.3 (15.6)
Fasting Plasma Glucose, mg/dL	90.5 (8.8)	90.3 (8.9)
Fasting Plasma Insulin, IU/mL	15.6 (8.7)	15.6 (9.1)
HOMA-IR	3.5 (2.2)	3.5 (2.3)
Fasting Total Cholesterol, mg/dL	198.8 (39.8)	199.8 (38.9)
Fasting High-density Lipoprotein Cholesterol, mg/dL	52.2 (14.7)	52.5 (14.9)
Fasting Triglyceride, mg/dL	99.3 (57.4)	99.7 (70.2)
Hypertension, n (%)	646 (49%)	1353 (49%)
Systolic Blood Pressure, mmHg	125.7 (15.7)	126.7 (17.2)
Current Smoker, n (%)	158 (12%)	398 (15%)
eGFR CKD-Epi‡, mL/min/1.73 m2	95.9 (20.4)	96.3 (20.7)
Medication
Statin Usage, n (%)	122 (9%)	245 (9%)
Blood Pressure Medicaiton Usage, n (%)	577 (44%)	1202 (44%)
Values are mean (standard deviation) unless otherwise specified.
‡eGFR calculated using the CKD-EPI equation.

## Sheet: Supp Tbl4
Supplemental Table 4. Protein associations with incident T2D
						Model 1: age, sex, and batch adjusted					Model 2: + BMI and FPG					Model 3: + triglyceride level, HDL cholesterol level, eGFR, hypertension, and statin use
Entrez Gene Symbol	Aptamer ID	Soma ID	Protein	Protein Full Name	UniProt ID	HR	95% CI Low	95% CI Upper	P	FDR q	HR	95% CI Low	95% CI Upper	P	FDR q	HR	95% CI Low	95% CI Upper	P	FDR q
IGFBP2	8469-41	SL000466	IGFBP-2	Insulin-like growth factor-binding protein 2	P18065	0.56	0.49	0.65	1.33227e-15	2.48373e-13	0.68	0.58	0.79	1.06532e-06	0.000266761	0.68	0.57	0.8	7.85873e-06	0.00349967
UCHL1	5019-16	SL002803	PGP9.5	Ubiquitin carboxyl-terminal hydrolase isozyme L1	P09936	0.76	0.66	0.87	5.24049e-05	0.000759871	0.74	0.65	0.85	1.034e-05	0.000954415	0.76	0.67	0.87	6.15587e-05	0.00819846
PFDN5	4271-75	SL006705	PFD5	Prefoldin subunit 5	Q99471	0.8	0.7	0.91	0.000783955	0.00673067	0.75	0.67	0.86	1.2452e-05	0.000960174	0.78	0.68	0.88	8.79179e-05	0.00985215
BDNF	2421-7	SL003951	BDNF	Brain-derived neurotrophic factor	P23560	0.8	0.69	0.91	0.00108272	0.00844153	0.76	0.66	0.88	0.000256489	0.00816386	0.78	0.67	0.9	0.00122604	0.0457138
GSTP1	4911-49	SL003643	Glutathione S-transferase Pi	Glutathione S-transferase P	P09211	0.79	0.69	0.91	0.000801356	0.00673593	0.78	0.68	0.89	0.000224571	0.00771224	0.79	0.69	0.91	0.000725334	0.0342111
TAGLN2	9201-13	SL004811	Transgelin-2	Transgelin-2	P37802	0.81	0.72	0.93	0.00213873	0.0136816	0.77	0.68	0.88	5.775e-05	0.00279125	0.81	0.71	0.92	0.00121525	0.0457138
STUB1	10336-3	SL019100	CHIP	E3 ubiquitin-protein ligase CHIP	Q9UNE7	0.78	0.69	0.88	0.000100714	0.00125173	0.79	0.7	0.89	0.000100429	0.00422775	0.82	0.72	0.92	0.000892003	0.036377
UBE2G2	9199-6	SL018946	UB2G2	Ubiquitin-conjugating enzyme E2 G2	P60604	1.47	1.29	1.68	6.09406e-09	2.78441e-07	1.35	1.19	1.54	6.33511e-06	0.000688943	1.25	1.09	1.43	0.00137609	0.0498831
NRG4	14139-16	SL007828	NRG4	Neuregulin-4	Q8WWG1	1.27	1.13	1.43	8.71472e-05	0.00113727	1.23	1.09	1.4	0.000948513	0.020292	1.25	1.1	1.42	0.000734032	0.0342111
KLKB1	4152-58	SL000545	Prekallikrein	Plasma kallikrein	P03952	1.34	1.18	1.52	5.13028e-06	0.000103	1.3	1.15	1.48	4.27081e-05	0.00214362	1.26	1.11	1.44	0.000522357	0.029312
CCL26	9168-31	SL003170	Eotaxin-3	C-C motif chemokine 26	Q9Y258	1.19	1.05	1.36	0.0082405	0.0374472	1.24	1.09	1.42	0.00131106	0.023763	1.26	1.1	1.44	0.000786991	0.0354146
IGFBP4	2950-57	SL005171	IGFBP-4	Insulin-like growth factor-binding protein 4	P22692	1.55	1.36	1.76	6.67906e-11	6.22584e-09	1.37	1.19	1.56	5.23846e-06	0.000621472	1.27	1.11	1.46	0.000707997	0.0342111
TYK2	5260-80	SL007181	TYK2	Non-receptor tyrosine-protein kinase TYK2	P29597	1.43	1.25	1.63	1.59959e-07	5.49333e-06	1.33	1.17	1.51	1.28023e-05	0.000960174	1.27	1.12	1.45	0.000294165	0.0274204
SIGLEC7	2742-68	SL005218	Siglec-7	Sialic acid-binding Ig-like lectin 7	Q9Y286	1.32	1.17	1.51	1.65724e-05	0.000292257	1.31	1.15	1.49	7.13301e-05	0.00332449	1.27	1.11	1.46	0.00053907	0.029312
RXFP1	14135-3	SL020172	RXFP1	Relaxin receptor 1	Q9HBX9	1.29	1.13	1.47	0.000174757	0.00200051	1.29	1.12	1.49	0.000432869	0.0115285	1.27	1.1	1.47	0.000834674	0.0363083
MMP7	2789-26	SL000525	MMP-7	Matrilysin	P09237	1.28	1.11	1.48	0.000793926	0.00673593	1.36	1.18	1.56	1.32438e-05	0.000960174	1.27	1.11	1.45	0.000440583	0.029312
F9	5307-12	SL004400	Coagulation Factor IXab	Coagulation factor IXab	P00740	1.71	1.5	1.94	2.2204e-16	7.24405e-14	1.39	1.21	1.6	4.29099e-06	0.000559974	1.28	1.1	1.49	0.00119127	0.0457138
FTCD	9213-24	SL018900	FTCD	Formimidoyltransferase-cyclodeaminase	O95954	1.49	1.31	1.71	5.08758e-09	2.55357e-07	1.34	1.18	1.54	1.59818e-05	0.0010977	1.28	1.12	1.46	0.000405467	0.029312
HSD17B1	4708-3	SL004253	17-beta-HSD 1	Estradiol 17-beta-dehydrogenase 1	P14061	1.22	1.07	1.38	0.00256542	0.0157177	1.28	1.12	1.46	0.000377911	0.0102745	1.28	1.11	1.47	0.000476318	0.029312
RTN4R	5105-2	SL005208	Nogo Receptor	Reticulon-4 receptor	Q9BZR6	1.6	1.41	1.82	9.19487e-13	1.19993e-10	1.4	1.22	1.6	8.65985e-07	0.000266761	1.3	1.13	1.5	0.000316842	0.0275652
HMGB1	2524-56	SL003280	HMG-1	High mobility group protein B1	P09429	1.2	1.05	1.38	0.00948756	0.0405943	1.31	1.13	1.52	0.000297325	0.00902347	1.3	1.11	1.51	0.000881404	0.036377
AIMP1	2714-78	SL003334	EMAP-2	Endothelial monocyte-activating polypeptide 2	Q12904	1.38	1.2	1.58	4.19732e-06	8.55861e-05	1.31	1.13	1.51	0.000251465	0.00816386	1.31	1.13	1.53	0.000353963	0.0288701
H2AFZ	4163-5	SL002093	Histone H2A.z	Histone H2A.z	P0C0S5	1.34	1.18	1.53	9.95971e-06	0.000185678	1.35	1.17	1.55	3.631e-05	0.0019164	1.31	1.13	1.51	0.000278055	0.0274204
IL2RA	3151-6	SL003305	IL-2 sRa	Interleukin-2 receptor subunit alpha	P01589	1.26	1.11	1.43	0.000441331	0.00429803	1.26	1.11	1.44	0.000478102	0.0124785	1.31	1.16	1.49	2.18927e-05	0.00472323
F9	4876-32	SL000357	Coagulation Factor IX	Coagulation factor IX	P00740	1.75	1.54	2	2.2204e-16	7.24405e-14	1.43	1.23	1.66	1.83574e-06	0.000266761	1.32	1.13	1.55	0.000561793	0.0293256
CRP	4337-49	SL000051	CRP	C-reactive protein	P02741	1.53	1.34	1.74	1.39561e-10	1.21418e-08	1.27	1.09	1.47	0.00180225	0.0290362	1.32	1.13	1.54	0.000444561	0.029312
CFH	4159-130	SL000415	Factor H	Complement factor H	P08603	1.54	1.33	1.78	6.17513e-09	2.78441e-07	1.31	1.11	1.54	0.00105376	0.0205247	1.32	1.13	1.54	0.000525574	0.029312
IL18R1	3446-7	SL004152	IL-18 Ra	Interleukin-18 receptor 1	Q13478	1.62	1.42	1.84	6.10401e-13	8.85081e-11	1.38	1.19	1.6	1.94574e-05	0.00120914	1.36	1.17	1.59	6.28234e-05	0.00819846
LAMA1 LAMB1 LAMC1	2728-62	SL000497	Laminin	Laminin	P25391, P07942, P11047	1.58	1.39	1.79	3.23985e-12	3.25231e-10	1.38	1.19	1.59	1.73194e-05	0.00113009	1.36	1.17	1.59	9.05945e-05	0.00985215
BMP1	3348-49	SL003994	BMP-1	Bone morphogenetic protein 1	P13497	1.54	1.35	1.76	2.26431e-10	1.73819e-08	1.42	1.23	1.64	1.59711e-06	0.000266761	1.37	1.18	1.58	2.53353e-05	0.00472323
TOP1	2876-74	SL004305	Topoisomerase I	DNA topoisomerase 1	P11387	1.44	1.27	1.63	1.79145e-08	7.08439e-07	1.4	1.22	1.6	1.43385e-06	0.000266761	1.37	1.19	1.57	8.04522e-06	0.00349967
STK17B	5249-31	SL016566	DRAK2	Serine/threonine-protein kinase 17B	O94768	1.35	1.18	1.55	1.8006e-05	0.000313304	1.4	1.2	1.62	1.09703e-05	0.000954415	1.37	1.18	1.6	4.11136e-05	0.00670666
GHR	2948-58	SL005168	Growth hormone receptor	Growth hormone receptor	P10912	1.7	1.5	1.94	2.2204e-16	7.24405e-14	1.44	1.25	1.66	2.591e-07	0.000112708	1.41	1.21	1.65	1.51451e-05	0.00472323
RET	3220-40	SL010378	RET	Proto-oncogene tyrosine-protein kinase receptor Ret	P07949	1.71	1.49	1.96	1.42109e-14	2.31814e-12	1.48	1.27	1.71	2.53531e-07	0.000112708	1.43	1.21	1.69	2.05616e-05	0.00472323
FABP3	5437-63	SL001774	FABP	Fatty acid-binding protein, heart	P05413	1.82	1.57	2.1	1.33227e-15	2.48373e-13	1.54	1.29	1.83	1.83973e-06	0.000266761	1.44	1.17	1.77	0.000487788	0.029312
HIST1H1C	2987-37	SL005256	Histone H1.2	Histone H1.2	P16403	1.45	1.26	1.66	1.07977e-07	3.91416e-06	1.6	1.37	1.87	2.3845e-09	3.11177e-06	1.52	1.29	1.78	3.21332e-07	0.000419338
IGFBP1	2771-35	SL000462	IGFBP-1	Insulin-like growth factor-binding protein 1	P08833	0.57	0.5	0.65	2.2204e-16	7.24405e-14	0.7	0.6	0.82	6.91265e-06	0.000693923
PLAT	2212-69	SL000053	tPA	Tissue-type plasminogen activator	P00750	1.69	1.49	1.91	4.4409e-16	1.15907e-13	1.32	1.15	1.52	9.81184e-05	0.00422775
ADIPOQ	3554-24	SL004258	Adiponectin	Adiponectin	Q15848	0.6	0.52	0.69	1.61471e-12	1.91563e-10	0.71	0.6	0.83	2.57297e-05	0.00152624
LEP	8484-24	SL000498	Leptin	Leptin	P41159	1.98	1.64	2.39	1.8896e-12	2.05494e-10
SERPINC1	3344-60	SL000272	Antithrombin III	Antithrombin-III	P01008	0.64	0.56	0.74	2.01982e-10	1.64741e-08	0.76	0.66	0.89	0.000672021	0.0162405
WFIKKN2	3235-50	SL010391	WFKN2	WAP, Kazal, immunoglobulin, Kunitz and NTR domain-containing protein 2	Q8TEU8	0.65	0.57	0.74	2.81674e-10	2.04213e-08	0.78	0.67	0.9	0.00102609	0.0205247
NTRK3	2658-27	SL004639	TrkC	NT-3 growth factor receptor	Q16288	0.67	0.59	0.76	4.70277e-10	3.23006e-08	0.78	0.68	0.9	0.000688676	0.0163404
GFRA1	3314-74	SL004858	GFRa-1	GDNF family receptor alpha-1	P56159	1.49	1.31	1.69	6.18145e-10	4.0334e-08	1.31	1.15	1.51	8.15347e-05	0.00366906
IL1RN	5353-89	SL001990	IL-1Ra	Interleukin-1 receptor antagonist protein	P18510	1.55	1.35	1.79	9.02418e-10	5.60788e-08
ACY1	3343-1	SL005574	Aminoacylase-1	Aminoacylase-1	Q03154	1.57	1.36	1.81	1.20513e-09	7.14863e-08	1.37	1.16	1.61	0.00015936	0.0059237
APOM	14125-5	SL004747	ApoM	Apolipoprotein M	O95445	0.67	0.58	0.76	1.48998e-09	8.454e-08
INS	4883-56	SL000021	Insulin	Insulin	P01308	1.5	1.31	1.71	2.34975e-09	1.27768e-07	1.32	1.13	1.53	0.000499991	0.0125478
SHBG	4929-55	SL005102	SHBG	Sex hormone-binding globulin	P04278	0.63	0.55	0.74	2.77074e-09	1.44633e-07	0.79	0.67	0.92	0.00245436	0.0359881
EHMT2	5843-60	SL003542	NG36	Histone-lysine N-methyltransferase EHMT2	Q96KQ7	0.67	0.59	0.77	6.18757e-09	2.78441e-07	0.77	0.67	0.89	0.000289769	0.00900353
UNC5D	5140-56	SL005231	UNC5H4	Netrin receptor UNC5D	Q6UXZ4	0.69	0.61	0.78	8.21069e-09	3.57165e-07
CNTN1	2974-61	SL004855	contactin-1	Contactin-1	Q12860	0.7	0.62	0.79	9.71947e-09	4.09158e-07	0.82	0.72	0.94	0.00355291	0.0441576
CXCL12	3516-60	SL004712	SDF-1	Stromal cell-derived factor 1	P48061	0.68	0.6	0.78	1.64914e-08	6.72541e-07	0.82	0.71	0.93	0.00301942	0.0406221
SOD3	8463-2	SL003672	SOD3	Extracellular superoxide dismutase [Cu-Zn]	P08294	0.69	0.6	0.79	7.71308e-08	2.96046e-06
FABP5	4985-11	SL005352	FABPE	Fatty acid-binding protein, epidermal	Q01469	1.38	1.22	1.55	1.00166e-07	3.73475e-06	1.24	1.08	1.42	0.0026614	0.0373455
NOTCH3	5108-72	SL005209	Notch-3	Neurogenic locus notch homolog protein 3	Q9UM47	0.69	0.61	0.8	1.28068e-07	4.51699e-06	0.79	0.68	0.91	0.00101085	0.0205247
TFPI	3336-50	SL001998	TFPI	Tissue factor pathway inhibitor	P10646	1.46	1.27	1.69	1.83233e-07	6.13125e-06	1.34	1.15	1.56	0.00023651	0.00791399
ESM1	3805-16	SL010458	Endocan	Endothelial cell-specific molecule 1	Q9NQ30	0.7	0.61	0.8	2.45856e-07	8.02106e-06
TNFAIP6	5036-50	SL004782	TSG-6	Tumor necrosis factor-inducible gene 6 protein	P98066	0.68	0.59	0.79	2.68658e-07	8.5512e-06
IL1R1	2991-9	SL001997	IL-1 sRI	Interleukin-1 receptor type 1	P14778	0.71	0.62	0.81	3.5804e-07	1.11248e-05
IDS	3198-4	SL008639	IDS	Iduronate 2-sulfatase	P22304	0.72	0.64	0.82	4.0238e-07	1.22118e-05	0.79	0.7	0.9	0.000222071	0.00771224
CFB	4129-72	SL000414	Factor B	Complement factor B	P00751	1.44	1.25	1.67	5.64517e-07	1.64452e-05
SERPINF1	9211-19	SL003066	PEDF	Pigment epithelium-derived factor	P36955	1.44	1.25	1.66	5.67074e-07	1.64452e-05
APCS	2474-54	SL000573	SAP	Serum amyloid P-component	P02743	1.42	1.24	1.63	5.82915e-07	1.6537e-05
ANGPT2	2602-2	SL001996	Angiopoietin-2	Angiopoietin-2	O15123	1.39	1.22	1.58	6.62564e-07	1.83967e-05	1.28	1.12	1.47	0.000370964	0.0102745
LGALS3BP	5000-52	SL006522	LG3BP	Galectin-3-binding protein	Q08380	1.4	1.23	1.6	6.83733e-07	1.8589e-05
ERP29	4983-6	SL003522	ERP29	Endoplasmic reticulum resident protein 29	P30040	1.4	1.23	1.61	8.84068e-07	2.35451e-05	1.32	1.16	1.5	3.67126e-05	0.0019164
CCL25	2705-5	SL003197	TECK	C-C motif chemokine 25	O15444	1.38	1.21	1.58	1.1335e-06	2.95845e-05	1.29	1.13	1.49	0.000305684	0.0090663
TGFB3	3520-58	SL000089	TGF-b3	Transforming growth factor beta-3	P10600	1.38	1.21	1.57	1.18753e-06	3.03867e-05	1.25	1.08	1.45	0.00215585	0.0328677
BMPR1A	4859-6	SL004080	BMPR1A	Bone morphogenetic protein receptor type-1A	P36894	0.72	0.63	0.82	1.21941e-06	3.06024e-05
CHL1	3601-54	SL008936	CHL1	Neural cell adhesion molecule L1-like protein	O00533	0.71	0.62	0.82	1.54714e-06	3.80947e-05
CHRDL1	3362-61	SL009400	CRDL1	Chordin-like protein 1	Q9BU40	0.7	0.61	0.81	1.84939e-06	4.46935e-05
CFI	2567-5	SL003328	Factor I	Complement factor I	P05156	1.4	1.22	1.61	2.06593e-06	4.90188e-05
RARRES2	3079-62	SL005152	TIG2	Retinoic acid receptor responder protein 2	Q99969	1.37	1.2	1.55	2.16288e-06	5.04028e-05
C5	2851-63	SL000320	C5a	C5a anaphylatoxin	P01031	1.42	1.23	1.64	2.30419e-06	5.27539e-05
AFM	4763-31	SL004742	Afamin	Afamin	P43652	1.38	1.21	1.58	2.46286e-06	5.54144e-05	1.23	1.08	1.42	0.00278255	0.0382235
APP	3171-57	SL004469	amyloid precursor protein	Amyloid beta A4 protein	P05067	0.73	0.64	0.83	2.73564e-06	6.05087e-05	0.77	0.68	0.88	0.000163413	0.0059237
FGFR1	5532-53	SL003060	bFGF-R	Fibroblast growth factor receptor 1	P11362	0.74	0.65	0.84	2.80843e-06	6.10834e-05
SET	5364-7	SL007336	SET	Protein SET	Q01105	1.45	1.24	1.7	3.364e-06	7.19676e-05	1.31	1.11	1.55	0.00145472	0.0256543
ARTN	2939-10	SL004670	Artemin	Artemin	Q5T4W7	1.35	1.19	1.53	3.69169e-06	7.74834e-05	1.24	1.09	1.42	0.00134887	0.0241133
TIMP2	2278-61	SL000592	TIMP-2	Metalloproteinase inhibitor 2	P16035	0.73	0.64	0.84	3.74058e-06	7.74834e-05
LRP8	3323-37	SL004610	LRP8	Low-density lipoprotein receptor-related protein 8	Q14114	0.74	0.65	0.84	6.525e-06	0.000129017
SERPINA1	3580-25	SL000249	a1-Antitrypsin	Alpha-1-antitrypsin	P01009	0.74	0.65	0.85	7.02193e-06	0.00013677	0.8	0.7	0.91	0.0010335	0.0205247
TNNT2	5315-22	SL000052	Troponin T	Troponin T, cardiac muscle	P45379	1.43	1.22	1.67	8.86357e-06	0.000167637	1.33	1.13	1.56	0.00064409	0.0158592
LRP1	9182-3	SL004733	sLRP1	Low-density lipoprotein receptor-related protein 1, soluble	Q07954	0.74	0.65	0.85	8.80707e-06	0.000167637
TF	4162-54	SL000601	Transferrin	Serotransferrin	P02787	0.73	0.63	0.84	1.33135e-05	0.000244705
NID2	3633-70	SL008193	NID2	Nidogen-2	Q14112	0.74	0.65	0.85	1.41696e-05	0.000253305	0.77	0.67	0.88	0.000121537	0.00486746
SPP1	13113-7	SL002688	Osteopontin	Osteopontin	P10451	0.75	0.66	0.85	1.4122e-05	0.000253305
CD200	5112-73	SL014268	OX2G	OX-2 membrane glycoprotein	P41217	0.75	0.66	0.86	1.91653e-05	0.000329088
ROR1	8474-6	SL006114	ROR1	Tyrosine-protein kinase transmembrane receptor ROR1	Q01973	0.76	0.66	0.86	2.06473e-05	0.000349932
VEGFC	3132-1	SL004486	VEGF-C	Vascular endothelial growth factor C	P49767	0.74	0.64	0.85	2.46861e-05	0.000413018	0.79	0.68	0.91	0.00104544	0.0205247
ITGAV ITGB5	4917-62	SL003182	Integrin aVb5	Integrin alpha-V: beta-5 complex	P06756, P18084	0.73	0.63	0.85	2.69602e-05	0.000445356	0.74	0.64	0.85	3.57843e-05	0.0019164
LMAN2	7638-30	SL005403	Lectin, mannose-binding 2	Vesicular integral-membrane protein VIP36	Q12907	1.31	1.15	1.49	2.74576e-05	0.000447901
CCL28	2890-59	SL003303	CCL28	C-C motif chemokine 28	Q9NRJ3	0.75	0.66	0.86	3.19928e-05	0.000515439
PROS1	2700-56	SL000049	Protein S	Vitamin K-dependent protein S	P07225	1.34	1.16	1.53	3.75024e-05	0.000596836	1.3	1.13	1.5	0.000325393	0.00943641
NRP1	5542-22	SL006397	NRP1	Neuropilin-1	O14786	0.75	0.66	0.86	3.98862e-05	0.000627127
FCN3	5462-62	SL002086	Ficolin-3	Ficolin-3	O75636	1.33	1.16	1.52	4.05735e-05	0.000630338	1.25	1.1	1.43	0.000967228	0.0203586
ANGPT1	2811-27	SL001995	Angiopoietin-1	Angiopoietin-1	Q15389	0.77	0.68	0.87	4.60653e-05	0.000707237	0.8	0.7	0.92	0.00175218	0.0289443
SLITRK5	4568-17	SL014070	SLIK5	SLIT and NTRK-like protein 5	O94991	0.76	0.66	0.87	4.68402e-05	0.000710773
FGF1	3486-58	SL000299	b-ECGF	Fibroblast growth factor 1	P05230	1.29	1.14	1.46	4.85423e-05	0.000728134
FGF7	4487-1	SL001691	FGF7	Fibroblast growth factor 7	P21781	0.75	0.65	0.86	4.96215e-05	0.000735864	0.79	0.69	0.91	0.00078809	0.0183653
THBS2	3339-33	SL007206	TSP2	Thrombospondin-2	P35442	1.32	1.15	1.5	5.17423e-05	0.000758693
C3	5803-24	SL003362	C3d	Complement C3d fragment	P01024	1.33	1.16	1.53	5.38323e-05	0.000771991
IBSP	3415-61	SL004660	BSP	Bone sialoprotein 2	P21815	0.76	0.67	0.87	6.06657e-05	0.00086053
EPHA5	3806-55	SL004844	EphA5	Ephrin type-A receptor 5	P54756	0.75	0.65	0.86	6.38984e-05	0.000887937
SELL	4831-4	SL002823	sL-Selectin	L-Selectin	P14151	0.77	0.68	0.87	6.39587e-05	0.000887937
ADAMTS15	4533-76	SL012740	ATS15	A disintegrin and metalloproteinase with thrombospondin motifs 15	Q8TE58	1.31	1.15	1.5	6.59246e-05	0.000905595
CD84	3642-4	SL008588	SLAF5	SLAM family member 5	Q9UIB8	0.76	0.66	0.87	7.30558e-05	0.000993102	0.8	0.69	0.92	0.00150879	0.0259075
CA3	3799-11	SL004867	Carbonic anhydrase III	Carbonic anhydrase 3	P07451	1.37	1.17	1.6	7.40559e-05	0.000996319
NTN4	3327-27	SL007673	NET4	Netrin-4	Q9HB63	1.29	1.14	1.47	8.10367e-05	0.00107911
FAM107B	4774-62	SL016129	FAM107B	Protein FAM107B	Q9H098	1.34	1.16	1.55	8.59872e-05	0.00113347
CDH6	3591-51	SL004865	Cadherin-6	Cadherin-6	P55285	1.3	1.14	1.48	9.48899e-05	0.00122605
TGFBR3	3009-3	SL005059	TGF-b R III	Transforming growth factor beta receptor type 3	Q03167	0.77	0.67	0.88	9.77181e-05	0.00125022
PLA2G2A	2692-74	SL002528	NPS-PLA2	Phospholipase A2, membrane associated	P14555	1.31	1.14	1.5	0.0001004	0.00125173
PIANP	14114-18	SL019019	PIANP	PILR alpha-associated neural protein	Q8IYJ0	0.77	0.67	0.88	9.97712e-05	0.00125173
PPBP	4544-4	SL004708	CTAP-III	Connective tissue-activating peptide III	P02775	0.77	0.68	0.88	0.000116164	0.00143013	0.81	0.71	0.93	0.00348892	0.0437793
PPBP	2790-54	SL003191	NAP-2	Neutrophil-activating peptide 2	P02775	0.77	0.68	0.88	0.000117591	0.00143417	0.81	0.71	0.93	0.00316579	0.0413135
FCN2	3313-21	SL006542	FCN2	Ficolin-2	Q15485	1.32	1.15	1.52	0.000126376	0.00152704
DKK4	3365-7	SL010612	Dkk-4	Dickkopf-related protein 4	Q9UBT3	0.78	0.69	0.89	0.000128469	0.0015381
PDGFA	4499-21	SL000535	PDGF-AA	Platelet-derived growth factor subunit A	P04085	0.77	0.68	0.88	0.000130597	0.00154935	0.8	0.7	0.92	0.0017944	0.0290362
CCL5	5480-49	SL000563	RANTES	C-C motif chemokine 5	P13501	0.78	0.68	0.88	0.000132206	0.00155431	0.8	0.7	0.92	0.00130224	0.023763
PF4	2697-7	SL003041	PF-4	Platelet factor 4	P02776	0.78	0.68	0.88	0.000152954	0.00178219	0.81	0.71	0.93	0.00313503	0.0413135
OPCML	3634-5	SL005491	OBCAM	Opioid-binding protein/cell adhesion molecule	Q14982	1.27	1.12	1.44	0.000168131	0.00194169
RSPO2	4566-24	SL013989	RSPO2	R-spondin-2	Q6UXX9	1.27	1.12	1.44	0.000194976	0.00221256
IL12RB2	3815-14	SL007620	IL-12 RB2	Interleukin-12 receptor subunit beta-2	Q99665	0.78	0.68	0.89	0.00019806	0.00222818	0.82	0.72	0.94	0.00413731	0.0489705
MYBPC1	7648-9	SL017328	MYPC1	Myosin-binding protein C, slow-type	Q00872	1.34	1.15	1.56	0.000204731	0.00228353
LRRTM1	4452-9	SL014096	LRRT1	Leucine-rich repeat transmembrane neuronal protein 1	Q86UE6	1.27	1.12	1.43	0.000209147	0.00231303	1.24	1.08	1.43	0.00219118	0.0328677
S100A9	5339-49	SL004477	calgranulin B	Protein S100-A9	P06702	1.32	1.14	1.53	0.00021438	0.00235098	1.28	1.1	1.5	0.00171643	0.0287172
FGF17	3494-71	SL004335	FGF-17	Fibroblast growth factor 17	O60258	1.27	1.12	1.44	0.000216975	0.00235961
SERPINA3	2879-9	SL000248	a1-Antichymotrypsin	Alpha-1-antichymotrypsin	P01011	0.77	0.67	0.89	0.000221916	0.00239339
SPARC	3043-49	SL000532	ON	SPARC	P09486	0.77	0.67	0.89	0.000239775	0.0025648	0.81	0.7	0.93	0.00346059	0.0437793
SCARF1	5129-12	SL005221	SREC-I	Scavenger receptor class F member 1	Q14162	0.78	0.68	0.89	0.000276495	0.00293354
C2	3186-2	SL002525	C2	Complement C2	P06681	1.34	1.14	1.56	0.000281016	0.00295747
ENG	4908-6	SL004482	Endoglin	Endoglin	P17813	0.79	0.7	0.9	0.000293238	0.0030376
NCAM1	4498-62	SL003764	NCAM-120	Neural cell adhesion molecule 1, 120 kDa isoform	P13591	0.77	0.67	0.89	0.000293286	0.0030376
LGALS4	2982-82	SL005165	Galectin-4	Galectin-4	P56470	1.25	1.11	1.4	0.000305327	0.00313742
PAFAH1B2	2642-4	SL004760	PAFAH beta subunit	Platelet-activating factor acetylhydrolase IB subunit beta	P68402	0.77	0.67	0.89	0.000324443	0.0033078	0.8	0.69	0.92	0.00149192	0.0259075
IGHG1 IGHG2 IGHG3 IGHG4 IGK@ IGL@	2744-57	SL000467	IgG	Immunoglobulin G	P01857	0.79	0.69	0.9	0.000344434	0.00345758
AFP	5792-8	SL000011	AFP	alpha-Fetoprotein	P02771	0.78	0.68	0.89	0.000342989	0.00345758
PDGFB	4149-8	SL000537	PDGF-BB	Platelet-derived growth factor subunit B	P01127	0.78	0.69	0.9	0.000383789	0.00379428
PSPN	2696-87	SL004685	Persephin	Persephin	O60542	1.29	1.12	1.49	0.000383583	0.00379428
KLK11	2831-29	SL002763	Kallikrein 11	Kallikrein-11	Q9UBX7	0.79	0.69	0.9	0.000421368	0.00413448
IL6	4673-13	SL000087	IL-6	Interleukin-6	P05231	1.28	1.11	1.46	0.000485483	0.00463425
GDF5	2752-62	SL004329	BMP-14	Growth/differentiation factor 5	P43026	0.78	0.68	0.9	0.00049361	0.00463425
GSN	4775-34	SL005572	Gelsolin	Gelsolin	P06396	0.78	0.68	0.9	0.000484545	0.00463425
PTH	5954-62	SL003970	PTH	Parathyroid hormone	P01270	1.24	1.1	1.4	0.000490536	0.00463425
GPD1	11081-1	SL007151	GPDA	Glycerol-3-phosphate dehydrogenase [NAD(+)], cytoplasmic	P21695	1.27	1.11	1.46	0.000490869	0.00463425
MAP2K2	3628-3	SL010501	MP2K2	Dual specificity mitogen-activated protein kinase kinase 2	P36507	1.29	1.12	1.49	0.000511514	0.00476804
THBS1	3474-19	SL002705	Thrombospondin-1	Thrombospondin-1	P07996	0.79	0.7	0.9	0.000528068	0.00488744
CD163	5028-59	SL005764	sCD163	Scavenger receptor cysteine-rich type 1 protein M130	Q86VB7	1.26	1.11	1.44	0.000539135	0.00495473
BCAN	3461-58	SL009089	PGCB	Brevican core protein	Q96GW7	0.78	0.67	0.9	0.000567562	0.0051795
SERPINE1	2925-9	SL000006	PAI-1	Plasminogen activator inhibitor 1	P05121	1.26	1.1	1.44	0.000593019	0.00537424
ERBB4	2618-10	SL003803	ERBB4	Receptor tyrosine-protein kinase erbB-4	Q15303	1.22	1.09	1.37	0.000597899	0.00538109
HTRA2	3317-33	SL004860	HTRA2	Serine protease HTRA2, mitochondrial	O43464	0.78	0.68	0.9	0.000608069	0.00543513	0.8	0.69	0.93	0.00375615	0.045811
WIF1	2848-2	SL004652	WIF-1	Wnt inhibitory factor 1	Q9Y5W5	0.79	0.69	0.9	0.000612968	0.00544165
MIA	2687-2	SL001947	MIA	Melanoma-derived growth regulatory protein	Q16674	0.78	0.68	0.9	0.000627238	0.00553071
NOTCH2	5106-52	SL007356	NOTC2	Neurogenic locus notch homolog protein 2	Q04721	1.25	1.1	1.42	0.000642208	0.00562471
CAST	3026-5	SL000338	Calpastatin	Calpastatin	P20810	0.79	0.69	0.9	0.000697912	0.00607184
TNFRSF1A	2654-19	SL001992	TNF sR-I	Tumor necrosis factor receptor superfamily member 1A	P19438	1.27	1.11	1.46	0.00072267	0.00624559
KLK5	3201-49	SL003863	kallikrein 5	Kallikrein-5	Q9Y337	1.24	1.09	1.41	0.000811763	0.00673593	1.25	1.09	1.42	0.000940162	0.020292
CKB CKM	3714-49	SL000382	CK-MB	Creatine kinase M-type:Creatine kinase B-type heterodimer	P12277 P06732	1.31	1.12	1.53	0.000820699	0.00673593
SIGLEC6	2741-22	SL005217	Siglec-6	Sialic acid-binding Ig-like lectin 6	O43699	1.26	1.1	1.44	0.0008012	0.00673593
CKM	2670-67	SL000383	CK-MM	Creatine kinase M-type	P06732	1.32	1.12	1.55	0.000816947	0.00673593
DKK3	3607-71	SL009412	DKK3	Dickkopf-related protein 3	Q9UBP4	0.77	0.66	0.9	0.00082008	0.00673593
IL2	3070-1	SL000478	IL-2	Interleukin-2	P60568	1.24	1.09	1.4	0.000847359	0.00691127
HIST1H3A	14146-92	SL008158	H31	Histone H3.1	P68431	0.8	0.7	0.91	0.000853302	0.00691651	0.8	0.71	0.92	0.00093697	0.020292
F2	5316-54	SL000558	Prothrombin	Prothrombin	P00734	0.79	0.69	0.91	0.000897118	0.00722678
KPNB1	3887-90	SL010927	IMB1	Importin subunit beta-1	Q14974	0.8	0.7	0.91	0.000906809	0.00726004	0.8	0.71	0.91	0.000912759	0.020292
TNF	5936-53	SL002517	TNF-a	Tumor necrosis factor	P01375	1.23	1.09	1.39	0.00105539	0.00837122	1.24	1.09	1.41	0.00115142	0.0220971
PLA2G7	5015-15	SL003440	PAFAH	Platelet-activating factor acetylhydrolase	Q13093	0.79	0.69	0.91	0.00106105	0.00837122
A2M	3708-62	SL000252	a2-Macroglobulin	Alpha-2-macroglobulin	P01023	0.79	0.69	0.91	0.00106484	0.00837122
PPIF	5248-68	SL005793	Cyclophilin F	Peptidyl-prolyl cis-trans isomerase F, mitochondrial	P30405	0.8	0.7	0.91	0.00109194	0.00844153	0.8	0.7	0.91	0.000885597	0.0202755
CDH1	2501-51	SL000055	Cadherin E	Cadherin-1	P12830	1.26	1.1	1.44	0.00109319	0.00844153	1.27	1.09	1.48	0.00207578	0.0322487
IGF2R	3676-15	SL003679	IGF-II receptor	Cation-independent mannose-6-phosphate receptor	P11717	1.24	1.09	1.41	0.00110832	0.00850797
CXCL1	2985-35	SL003173	Gro-a	Growth-regulated alpha protein	P09341	0.8	0.71	0.92	0.00111833	0.00853462
DLL4	3305-6	SL010457	DLL4	Delta-like protein 4	Q9NR61	0.81	0.71	0.92	0.00113615	0.00861089
TIMP3	2480-58	SL003043	TIMP-3	Metalloproteinase inhibitor 3	P35625	0.8	0.7	0.92	0.00114152	0.00861089
GNS	3616-3	SL008504	GNS	N-acetylglucosamine-6-sulfatase	P15586	1.24	1.09	1.41	0.00124876	0.00936572
PDGFRA	10366-11	SL001728	PDGFRA	Platelet-derived growth factor receptor alpha	P16234	0.8	0.69	0.91	0.00128276	0.00956571
PROK1	2247-20	SL004332	EG-VEGF	Prokineticin-1	P58294	1.22	1.08	1.38	0.00131861	0.00977722
ADAMTS4	2809-25	SL004625	ADAMTS-4	A disintegrin and metalloproteinase with thrombospondin motifs 4	O75173	1.22	1.08	1.38	0.00132951	0.00979729
CCL18	3044-3	SL003323	PARC	C-C motif chemokine 18	P55774	1.23	1.08	1.4	0.00133634	0.00979729
IL25	4137-57	SL004351	IL-17E	Interleukin-25	Q9H293	1.24	1.09	1.41	0.00134398	0.00979828
COMMD7	2823-7	SL004704	COMMD7	COMM domain-containing protein 7	Q86VX2	0.8	0.7	0.92	0.00136605	0.0099039
LCORL	4304-18	SL006698	transcription factor MLR1, isoform CRA_b	Ligand-dependent nuclear receptor corepressor-like protein	Q8N3X6	1.24	1.09	1.42	0.00148602	0.0105971
KLK8	2834-54	SL003915	kallikrein 8	Kallikrein-8	O60259	0.8	0.7	0.92	0.00148403	0.0105971
GP1BA	4990-87	SL006460	GP1BA	Platelet glycoprotein Ib alpha chain	P07359	0.81	0.71	0.92	0.00147547	0.0105971
ANXA6	5335-73	SL003647	annexin VI	Annexin A6	P08133	0.81	0.72	0.92	0.00150412	0.0106678
LDLR	13129-40	SL007070	LDLR	Low-density lipoprotein receptor	P01130	1.24	1.09	1.42	0.00152184	0.0107351
HGFAC	3617-80	SL006512	HGFA	Hepatocyte growth factor activator	Q04756	0.82	0.73	0.93	0.00154632	0.0108492
SPINT2	2843-13	SL001897	SPINT2	Kunitz-type protease inhibitor 2	O43291	0.8	0.69	0.92	0.00158713	0.011076
BIRC5	3472-40	SL000582	Survivin	Baculoviral IAP repeat-containing protein 5	O15392	1.24	1.08	1.41	0.00164759	0.0114052
PCNA	2915-6	SL000131	PCNA	Proliferating cell nuclear antigen	P12004	1.23	1.08	1.4	0.00165178	0.0114052
ACVRL1	2969-11	SL004851	ALK-1	Serine/threonine-protein kinase receptor R3	P37023	0.8	0.7	0.92	0.00166083	0.0114073
ACAN	3280-49	SL004661	Aggrecan	Aggrecan core protein	P16112	0.81	0.71	0.92	0.00169845	0.0116046
UBB	6641-60	SL017289	PolyUbiquitin K48	PolyUbiquitin K48-linked	P0CG47	1.23	1.08	1.39	0.00170825	0.0116108	1.23	1.08	1.41	0.00206696	0.0322487
CDC42BPB	3629-60	SL006805	MRCKB	Serine/threonine-protein kinase MRCK beta	Q9Y5S2	1.24	1.08	1.41	0.00175641	0.011815
ECM1	3366-51	SL006550	ECM1	Extracellular matrix protein 1	Q16610	0.8	0.69	0.92	0.00175485	0.011815
RPSA	4957-1	SL004605	40S ribosomal protein SA	40S ribosomal protein SA	P08865	0.8	0.69	0.92	0.00177761	0.0118963
LCMT1	4237-70	SL011770	LCMT1	Leucine carboxyl methyltransferase 1	Q9UIC8	0.81	0.72	0.93	0.00185849	0.0123742	0.82	0.72	0.93	0.00255119	0.0362247
CHKB	13117-232	SL018256	CHKB	Choline/ethanolamine kinase	Q9Y259	1.23	1.08	1.4	0.00188551	0.0124903
TNFSF12	5939-42	SL004365	TWEAK	Tumor necrosis factor ligand superfamily member 12	O43508	0.8	0.69	0.92	0.00190828	0.0125773
CTSD	5508-62	SL000344	Cathepsin D	Cathepsin D	P07339	1.24	1.08	1.41	0.00194618	0.0127024
MAP2K4	5242-37	SL007237	MP2K4	Dual specificity mitogen-activated protein kinase kinase 4	P45985	0.8	0.69	0.92	0.00194673	0.0127024
CASP3	3593-72	SL003711	Caspase-3	Caspase-3	P42574	0.81	0.71	0.93	0.00199345	0.0129325	0.81	0.7	0.93	0.00222061	0.0329306
PTGS2	3761-4	SL000027	COX-2	Prostaglandin G/H synthase 2	P35354	1.23	1.08	1.41	0.00200181	0.0129325	1.26	1.08	1.46	0.00254685	0.0362247
BCL2A1	3413-50	SL003703	BFL1	Bcl-2-related protein A1	Q16548	0.8	0.7	0.92	0.00207025	0.0133087	0.77	0.67	0.88	0.000132557	0.00508785
ANXA5	14158-17	SL003848	Annexin V	Annexin A5	P08758	0.8	0.69	0.92	0.00219971	0.0140031
MDK	2911-27	SL002621	Midkine	Midkine	P21741	0.82	0.73	0.93	0.002392	0.0151532
PSMD7	3898-5	SL007266	PSD7	26S proteasome non-ATPase regulatory subunit 7	P51665	0.81	0.7	0.93	0.00242855	0.0153104	0.81	0.71	0.92	0.00165043	0.0279715
SCARB2	5100-53	SL005197	LIMP II	Lysosome membrane protein 2	Q14108	1.23	1.08	1.4	0.00248433	0.0155122
FASLG	3052-8	SL000633	Fas ligand, soluble	Tumor necrosis factor ligand superfamily member 6, soluble form	P48023	0.82	0.72	0.93	0.00248187	0.0155122
NEGR1	13109-82	SL008810	NEGR1	Neuronal growth regulator 1	Q7Z3B1	0.83	0.73	0.93	0.00251027	0.0155995
PLA2G2E	2447-7	SL004066	GIIE	Group IIE secretory phospholipase A2	Q9NZK7	1.22	1.07	1.4	0.00252411	0.0156112
MSR1	3684-78	SL004580	Macrophage scavenger receptor	Macrophage scavenger receptor types I and II	P21757	1.2	1.06	1.34	0.00254897	0.0156906
CHGA	8476-11	SL002762	CgA	Chromogranin-A	P10645	0.81	0.71	0.93	0.00260119	0.0158624
BCAR3	5262-57	SL014470	BCAR3	Breast cancer anti-estrogen resistance protein 3	O75815	1.22	1.07	1.38	0.00266379	0.0161686
CNTFR	2711-6	SL005153	CNTFR alpha	Ciliary neurotrophic factor receptor subunit alpha	P26992	0.81	0.71	0.93	0.00270006	0.0163129
EPS15L1	4212-5	SL012188	EP15R	Epidermal growth factor receptor substrate 15-like 1	Q9UBC2	0.83	0.73	0.94	0.00274756	0.0165234
CCL21	2516-57	SL003193	6Ckine	C-C motif chemokine 21	O00585	1.23	1.07	1.4	0.0029262	0.0175169
PRKACA	3466-8	SL010513	PRKACA	cAMP-dependent protein kinase catalytic subunit alpha	P17612	0.83	0.73	0.94	0.00310758	0.0184336	0.81	0.71	0.92	0.00118237	0.0223622
CADM3	3630-27	SL004804	Nectin-like protein 1	Cell adhesion molecule 3	Q8N126	0.8	0.69	0.93	0.00310326	0.0184336
CA6	3352-80	SL010288	Carbonic anhydrase 6	Carbonic anhydrase 6	P23280	0.81	0.71	0.93	0.00312491	0.0184525
EFNA5	2615-60	SL004141	Ephrin-A5	Ephrin-A5	P52803	0.83	0.73	0.94	0.00313938	0.0184545
TNFRSF18	5526-53	SL004859	GITR	Tumor necrosis factor receptor superfamily member 18	Q9Y5U5	1.22	1.07	1.39	0.00319141	0.0186762
WFIKKN1	3191-50	SL012783	WFKN1	WAP, kazal, immunoglobulin, kunitz and NTR domain-containing protein 1	Q96NZ8	1.23	1.07	1.41	0.003277	0.0190914
CDH3	2643-57	SL004183	P-Cadherin	Cadherin-3	P22223	1.22	1.07	1.4	0.00336414	0.0194265
CMPK1	4786-58	SL007871	Cytidylate kinase	UMP-CMP kinase	P30085	1.21	1.06	1.37	0.00336527	0.0194265
VEGFA	2597-8	SL000002	VEGF	Vascular endothelial growth factor A	P15692	1.22	1.07	1.39	0.00337917	0.0194265
FGR	3810-50	SL006912	FGR	Tyrosine-protein kinase Fgr	P09769	1.21	1.06	1.37	0.0034062	0.019496	1.23	1.08	1.41	0.00190792	0.0303638
GRB2	5464-52	SL003792	GRB2 adapter protein	Growth factor receptor-bound protein 2	P62993	0.83	0.73	0.94	0.00342268	0.0195048
LDHB	3890-8	SL000493	LDH-H 1	L-lactate dehydrogenase B chain	P07195	0.82	0.72	0.94	0.00348559	0.0197769	0.81	0.71	0.93	0.00316366	0.0413135
SERPINA10	13119-26	SL004467	protein Z inhibitor	Protein Z-dependent protease inhibitor	Q9UK55	1.22	1.07	1.4	0.00352678	0.019924
MASP1	3605-77	SL011049	MASP3	Mannan-binding lectin serine protease 1	P48740	1.22	1.07	1.39	0.00355714	0.0200089
RPS3A	5484-63	SL011588	RS3A	40S ribosomal protein S3a	P61247	1.2	1.06	1.36	0.00357886	0.0200447
MAPKAPK5	3821-28	SL010504	MAPK5	MAP kinase-activated protein kinase 5	Q8IW41	0.82	0.71	0.94	0.00361605	0.0201664
CADM1	3326-58	SL004805	Nectin-like protein 2	Cell adhesion molecule 1	Q9BY67	0.82	0.72	0.94	0.00365147	0.0202773
FTH1 FTL	5934-1	SL000420	Ferritin	Ferritin	P02794 P02792	1.23	1.07	1.41	0.00367903	0.0203438
SNCA	8458-111	SL005266	a-Synuclein	Alpha-synuclein	P37840	0.82	0.72	0.94	0.00376793	0.0207474
NSFL1C	4250-23	SL006268	NSF1C	NSFL1 cofactor p47	Q9UNZ2	0.83	0.74	0.94	0.00387018	0.0211379	0.83	0.73	0.94	0.00326042	0.0421272
NID1	3213-65	SL000640	Nidogen	Nidogen-1	P14543	0.81	0.7	0.93	0.00390362	0.0211379
SELE	3470-1	SL001945	sE-Selectin	E-selectin	P16581	1.22	1.07	1.4	0.00389855	0.0211379
NRXN1	5110-84	SL009054	NRX1B	Neurexin-1-beta	P58400	0.82	0.71	0.94	0.00387161	0.0211379
RAC3	5271-5	SL007310	RAC3	Ras-related C3 botulinum toxin substrate 3	P60763	0.82	0.72	0.94	0.00407295	0.0218733
DYRK3	4359-87	SL013570	DYRK3	Dual specificity tyrosine-phosphorylation-regulated kinase 3	O43781	1.22	1.06	1.39	0.00405993	0.0218733
DKK1	3535-84	SL004367	DKK1	Dickkopf-related protein 1	O94907	0.83	0.74	0.94	0.00412988	0.0220881
CNTN2	3296-92	SL008623	CNTN2	Contactin-2	Q02246	0.81	0.71	0.94	0.00417894	0.0222592
BOC	4328-2	SL013490	BOC	Brother of CDO	Q9BWV1	0.82	0.71	0.94	0.00444059	0.0235568
IFNGR2	9180-6	SL007217	INGR2	Interferon gamma receptor 2	P38484	1.21	1.06	1.38	0.00451893	0.0238753
GDF2	4880-21	SL007756	GDF2	Growth/differentiation factor 2	Q9UK05	0.83	0.72	0.94	0.00469517	0.0247064
IL1RAP	2630-12	SL004588	IL-1 R AcP	Interleukin-1 Receptor accessory protein	Q9NPH3	0.84	0.74	0.95	0.00483675	0.0253493
ICAM1	4342-10	SL002922	sICAM-1	Intercellular adhesion molecule 1	P05362	1.22	1.06	1.41	0.00496906	0.0258351
MBL2	3000-66	SL004516	MBL	Mannose-binding protein C	P11226	0.83	0.73	0.94	0.00495147	0.0258351
HAMP	3504-58	SL004536	LEAP-1	Hepcidin	P81172	1.2	1.06	1.36	0.00532885	0.0275958
RPS7	3864-5	SL011528	RS7	40S ribosomal protein S7	P62081	1.19	1.05	1.35	0.00538038	0.0277525
SERPIND1	3316-58	SL004466	Heparin cofactor II	Heparin cofactor 2	P05546	1.23	1.06	1.42	0.00541287	0.0278102
C3	2683-1	SL000456	iC3b	Complement C3b, inactivated	P01024	1.2	1.06	1.36	0.00544961	0.0278892
YWHAE	14157-21	SL004984	14-3-3E	14-3-3 protein epsilon	P62258	0.83	0.73	0.95	0.00548532	0.0279623
DBNL	4978-54	SL011628	DBNL	Drebrin-like protein	Q9UJU6	0.82	0.71	0.94	0.00555701	0.0279996
CXCL10	4141-79	SL003183	IP-10	C-X-C motif chemokine 10	P02778	1.23	1.06	1.43	0.00551937	0.0279996
FGF4	4123-60	SL003171	FGF-4	Fibroblast growth factor 4	P08620	1.2	1.05	1.37	0.00553788	0.0279996
PLA2G10	2949-6	SL004067	GX	Group 10 secretory phospholipase A2	O15496	0.84	0.75	0.95	0.00568276	0.0285231
STX1A	3766-51	SL004304	STX1a	Syntaxin-1A	Q16623	1.2	1.05	1.36	0.00573187	0.0286593
XPNPEP1	3481-87	SL011073	XPNPEP1	Xaa-Pro aminopeptidase 1	Q9NQW7	0.84	0.74	0.95	0.00578089	0.0287941	0.83	0.73	0.94	0.00342978	0.0437793
HK2	13130-150	SL007272	HXK2	Hexokinase-2	P52789	1.19	1.05	1.35	0.00586782	0.029116
YWHAZ	5858-6	SL005688	14-3-3 protein zeta/delta	14-3-3 protein zeta/delta	P63104	0.83	0.73	0.95	0.00592334	0.0292801
CA2	4970-55	SL000339	carbonic anhydrase II	Carbonic anhydrase 2	P00918	1.19	1.05	1.35	0.00599744	0.0295346
PRKCG	5476-66	SL000556	PKC-G	Protein kinase C gamma type	P05129	1.19	1.05	1.35	0.00605944	0.0296164
PDK1	5227-60	SL006921	PDK1	[Pyruvate dehydrogenase (acetyl-transferring)] kinase isozyme 1, mitochondrial	Q15118	0.82	0.71	0.95	0.00604919	0.0296164
CFL1	4203-50	SL004920	Cofilin-1	Cofilin-1	P23528	0.82	0.71	0.95	0.0063198	0.0307737
LTA4H	3204-2	SL007100	LKHA4	Leukotriene A-4 hydrolase	P09960	0.84	0.74	0.95	0.00650799	0.0315722
KIT	2475-1	SL004010	SCF sR	Mast/stem cell growth factor receptor Kit	P10721	0.82	0.71	0.95	0.00667365	0.032256
CCL11	5301-7	SL000406	Eotaxin	Eotaxin	P51671	0.82	0.71	0.95	0.00677789	0.0326389
MRC1	2637-77	SL004579	Macrophage mannose receptor	Macrophage mannose receptor 1	P22897	1.21	1.05	1.39	0.00680839	0.0326653
PLXNB2	9216-100	SL009948	PLXB2	Plexin-B2	O15031	1.2	1.05	1.37	0.00688887	0.0329023
SORCS2	4569-52	SL014091	SORC2	VPS10 domain-containing receptor SorCS2	Q96PQ0	1.19	1.05	1.34	0.00690822	0.0329023
CLEC4M	3030-3	SL005158	DC-SIGNR	C-type lectin domain family 4 member M	Q9H2X3	1.22	1.06	1.41	0.0071494	0.0338566
LTBP4	13133-73	SL007033	LTBP4	Latent-transforming growth factor beta-binding protein 4	Q8N2S1	0.81	0.7	0.95	0.00716047	0.0338566
SCGB2A1	5001-6	SL001973	Mammaglobin 2	Mammaglobin-B	O75556	0.83	0.72	0.95	0.00730272	0.0344045	0.77	0.68	0.88	0.000123085	0.00486746
ABL2	5261-13	SL010488	ABL2	Abelson tyrosine-protein kinase 2	P42684	1.19	1.05	1.35	0.0075738	0.0355533
IL7	4140-3	SL000483	IL-7	Interleukin-7	P13232	1.2	1.05	1.36	0.0076134	0.0356111
CA13	3420-21	SL004869	Carbonic anhydrase XIII	Carbonic anhydrase 13	Q8N1Q1	0.83	0.72	0.95	0.00789895	0.0366837
REG1A	13095-51	SL005357	PSP	Lithostathine-1-alpha	P05451	0.83	0.72	0.95	0.00787872	0.0366837
EGF	5509-7	SL000084	EGF	Epidermal growth factor	P01133	0.84	0.73	0.95	0.00795597	0.0368175
CASP10	5340-24	SL003717	Caspase-10	Caspase-10	Q92851	1.18	1.04	1.34	0.00799988	0.0368899
CX3CL1	2827-23	SL000427	Fractalkine/CX3CL-1	Fractalkine	P78423	0.82	0.71	0.95	0.00809407	0.0371928
CDON	4541-49	SL014092	CDON	Cell adhesion molecule-related/down-regulated by oncogenes	Q4KMG0	1.21	1.05	1.4	0.00815883	0.0373589
GP6	3194-36	SL008759	GPVI	Platelet glycoprotein VI	Q9HCN6	0.83	0.73	0.95	0.00822293	0.0374472
IFNAR1	9183-7	SL004475	IFN-a/b R1	Interferon alpha/beta receptor 1	P17181	0.84	0.73	0.96	0.00826421	0.0374472
GCKR	5223-59	SL015728	GCKR	Glucokinase regulatory protein	Q14397	1.18	1.04	1.33	0.00836795	0.0377861
YWHAB	14156-33	SL004815	14-3-3 protein beta/alpha	14-3-3 protein beta/alpha	P31946	0.84	0.73	0.96	0.00842742	0.0379056
CD207	3361-26	SL010610	CLC4K	C-type lectin domain family 4 member K	Q9UJ71	1.18	1.04	1.34	0.0084525	0.0379056
NRCAM	5109-24	SL005210	Nr-CAM	Neuronal cell adhesion molecule	Q92823	0.84	0.74	0.96	0.00858677	0.0383758
CRYZL1	9207-60	SL018887	QORL1	Quinone oxidoreductase-like protein 1	O95825	1.19	1.05	1.36	0.00875032	0.0389733	1.21	1.06	1.37	0.00416531	0.0489705
KLK3	8468-19	SL000062	PSA	Prostate-specific antigen	P07288	0.76	0.62	0.93	0.0089199	0.0395934
LY9	3324-51	SL007674	LY9	T-lymphocyte surface antigen Ly-9	Q9HBG7	0.84	0.73	0.96	0.00895272	0.0396044
IL4R	3055-54	SL003308	IL-4 sR	Interleukin-4 receptor subunit alpha	P24394	1.17	1.04	1.32	0.00903444	0.0398309
HNRNPA2B1	5351-52	SL004891	hnRNP A2/B1	Heterogeneous nuclear ribonucleoproteins A2/B1	P22626	1.19	1.04	1.36	0.0091772	0.039906
SAA1	4336-2	SL000572	SAA	Serum amyloid A-1 protein	P0DJI8	1.21	1.05	1.39	0.00908569	0.039906
ESAM	2981-9	SL005160	ESAM	Endothelial cell-selective adhesion molecule	Q96AP7	0.84	0.74	0.96	0.00920438	0.039906
BGN	3284-75	SL007804	BGN	Biglycan	P21810	0.83	0.73	0.96	0.00911615	0.039906
EPHB6	5078-82	SL008414	EphB6	Ephrin type-B receptor 6	O15197	0.84	0.73	0.96	0.00919436	0.039906
CSNK2A1 CSNK2B	5225-50	SL016550	CK2-A1:B	Casein kinase II 2-alpha:2-beta heterotetramer	P68400 P67870	0.84	0.73	0.96	0.00931751	0.0401298	0.82	0.72	0.93	0.00281456	0.0382604
FLRT3	13123-3	SL008372	FLRT3	Leucine-rich repeat transmembrane protein FLRT3	Q9NZU0	0.83	0.73	0.96	0.00931185	0.0401298
CD63	9190-7	SL008837	CD63	CD63 antigen	P08962	1.18	1.04	1.34	0.0094516	0.0405735
ENO2	10339-48	SL001731	NSE	Gamma-enolase	P09104	0.85	0.75	0.96	0.00959001	0.0408986
CCL1	2770-51	SL003176	I-309	C-C motif chemokine 1	P22362	1.19	1.04	1.35	0.00974776	0.0414359
CTSS	3181-50	SL004673	Cathepsin S	Cathepsin S	P25774	1.19	1.04	1.35	0.00989582	0.0419287
SNX4	3903-49	SL005372	Sorting nexin 4	Sorting nexin-4	O95219	0.84	0.74	0.96	0.00996497	0.0420851
MMP2	4160-49	SL000124	MMP-2	72 kDa type IV collagenase	P08253	0.83	0.73	0.96	0.0100012	0.0421019
PDE4D	5255-22	SL011404	PDE4D	cAMP-specific 3',5'-cyclic phosphodiesterase 4D	Q08499	1.18	1.04	1.34	0.0100632	0.0422266
PTPN6	4318-12	SL004940	PTP-1C	Tyrosine-protein phosphatase non-receptor type 6	P29350	0.84	0.74	0.96	0.0102271	0.042777	0.83	0.73	0.94	0.00363772	0.0447851
PLA2G1B	4910-21	SL004064	GIB	Phospholipase A2	P04054	0.85	0.74	0.96	0.0103425	0.0431212
F10	4878-3	SL000360	Coagulation Factor X	Coagulation Factor X	P00742	1.2	1.04	1.37	0.0104344	0.0433657
XRCC6	2835-1	SL004301	Ku70	X-ray repair cross-complementing protein 6	P12956	1.18	1.04	1.34	0.0104905	0.0434605
TPM4	7660-21	SL003646	Tropomyosin 4	Tropomyosin alpha-4 chain	P67936	0.84	0.74	0.96	0.0105903	0.0437351
FSTL3	3438-10	SL009324	FSTL3	Follistatin-related protein 3	O95633	1.22	1.05	1.42	0.0106558	0.0438668
NCR1	5104-57	SL005207	NKp46	Natural cytotoxicity triggering receptor 1	O76036	0.84	0.73	0.96	0.0108435	0.0444993
RGMB	3331-8	SL010468	RGMB	RGM domain family member B	Q6NW40	0.84	0.74	0.96	0.0109653	0.0448582
HIST3H2A	14144-3	SL019979	H2A3	Histone H2A type 3	Q7L7L0	1.2	1.04	1.38	0.0110501	0.0450639
IL16	2774-10	SL000474	IL-16	Interleukin-16	Q14005	1.16	1.03	1.31	0.0113565	0.0461688
LTF	2780-35	SL000496	Lactoferrin	Lactotransferrin	P02788	1.18	1.04	1.35	0.0116632	0.0472687	1.27	1.11	1.45	0.000499361	0.0125478
GDNF	5822-22	SL004248	GDNF	Glial cell line-derived neurotrophic factor	P39905	1.19	1.04	1.36	0.0118845	0.0480165
FGF6	4130-71	SL004340	FGF-6	Fibroblast growth factor 6	P10767	0.85	0.75	0.96	0.0119524	0.0481418
ATP5O	9202-309	SL008113	ATPO	ATP synthase subunit O, mitochondrial	P48047	0.83	0.72	0.96	0.0122875	0.049339
MAP2K1	2864-2	SL003793	MEK1	Dual specificity mitogen-activated protein kinase kinase 1	Q02750						0.8	0.7	0.9	0.00034053	0.00966069
EIF5	2612-5	SL004759	eIF-5	Eukaryotic translation initiation factor 5	P55010						0.82	0.73	0.92	0.00126222	0.0235313
C4A C4B	2182-54	SL000318	C4b	Complement C4b	P0C0L4 P0C0L5						0.82	0.72	0.93	0.00216939	0.0328677
S100A4	14116-129	SL004821	S100A4	Protein S100-A4	P26447						0.82	0.72	0.93	0.00255377	0.0362247
MMP3	2788-55	SL000524	MMP-3	Stromelysin-1	P08254						1.24	1.08	1.42	0.00269235	0.0373778
CRK	4976-57	SL013240	CRK	Adapter molecule crk	P46108						0.82	0.72	0.94	0.00386106	0.0466545
APOE	2418-55	SL000276	Apo E	Apolipoprotein E	P02649						1.24	1.07	1.43	0.00395877	0.0473962
Hazard ratios obtained from Cox proportional hazards models with clinical covariable adjustments as listed. FDR q values that are <0.05 after adjusting for the 1,305 proteins measured are bolded and italicized.

## Sheet: Supp Tbl5
Supplemental Table 5. Orthoganol data supporting SOMA aptamer measurement specificity.
Entrez Gene Symbol	Aptamer ID	Soma ID	Protein	Protein Full Name	UniProt ID	Olink Platform (Spearman's Correlation)	Genetic Data
							Emilsson pQTL	Suhre pQTL	Sun pQTL	Benson pQTL	Katz pQTL	Pietzner pQTL	Ferkingstad pQTL	Zhang EA pQTL	Zhang AA pQTL
BDNF	2421-7_3	SL003951	BDNF	Brain-derived neurotrophic factor	P23560				trans			cis	cis
BMP1	3348-49_2	SL003994	BMP-1	Bone morphogenetic protein 1	P13497								cis	cis	cis
CFH	4159-130_1	SL000415	Factor H	Complement factor H	P08603			cis	cis	cis	cis	cis	cis	cis	cis
CRP	4337-49_2	SL000051	CRP	C-reactive protein	P02741				cis		cis	cis	cis	cis	cis
F9	4876-32_1	SL000357	Coagulation Factor IX	Coagulation factor IX	P00740	0.661574						trans	cis
F9	5307-12_3	SL004400	Coagulation Factor IXab	Coagulation factor IXab	P00740	0.650147						cis	cis
FABP3	5437-63_3	SL001774	FABP	Fatty acid-binding protein, heart	P05413							trans	trans		cis
FTCD	9213-24_3	SL018900	FTCD	Formimidoyltransferase-cyclodeamise	O95954						cis	cis	cis
GHR	2948-58_2	SL005168	Growth hormone receptor	Growth hormone receptor	P10912				cis		cis	cis	cis	cis	cis
GSTP1	4911-49_2	SL003643	Glutathione S-transferase Pi	Glutathione S-transferase P	P09211	0.316151	trans		cis			cis	cis	cis	cis
IGFBP2	8469-41_3	SL000466	IGFBP-2	Insulin-like growth factor-binding protein 2	P18065	0.881138							cis	cis
IGFBP4	2950-57_2	SL005171	IGFBP-4	Insulin-like growth factor-binding protein 4	P22692	0.277562	cis						cis	cis	cis
IL18R1	3446-7_2	SL004152	IL-18 Ra	Interleukin-18 receptor 1	Q13478	0.7782	cis	cis	cis	cis	cis
IL2RA	3151-6_1	SL003305	IL-2 sRa	Interleukin-2 receptor subunit alpha	P01589	0.0535871							cis	cis
KLKB1	4152-58_2	SL000545	Prekallikrein	Plasma kallikrein	P03952			cis			cis	cis	cis	cis	cis
LAMA1 LAMB1 LAMC1	2728-62_2	SL000497	Laminin	Laminin	P25391, P07942, P11047				cis	trans	trans	none
MMP7	2789-26_2	SL000525	MMP-7	Matrilysin	P09237	0.632772	cis	cis		cis		cis	cis	cis	cis
NRG4	14139-16_3	SL007828	NRG4	Neuregulin-4	Q8WWG1							trans	trans	cis
RET	3220-40_2	SL010378	RET	Proto-oncogene tyrosine-protein kise receptor Ret	P07949	0.742935	cis	cis	cis	cis	cis	cis	cis	cis	cis
RTN4R	5105-2_3	SL005208	Nogo Receptor	Reticulon-4 receptor	Q9BZR6	0.791269	cis		cis	trans	cis	cis	cis	cis	cis
SIGLEC7	2742-68_2	SL005218	Siglec-7	Sialic acid-binding Ig-like lectin 7	Q9Y286	0.677036	cis		cis	cis	cis	cis	cis	cis	cis
STUB1	10336-3_3	SL019100	CHIP	E3 ubiquitin-protein ligase CHIP	Q9UNE7							trans	cis
TAGLN2	9201-13_3	SL004811	Transgelin-2	Transgelin-2	P37802						trans	cis	cis	cis	cis

## Sheet: Supp Tbl6
Supplemental Table 6. Protein associations with incident T2D after adjustments for social determinants of health.
Entrez Gene Symbol	Aptamer ID	Soma ID	Protein	Protein Full Name	UniProt ID	Hazard Ratio	95% CI Low	95% CI Upper	P value	FDR q
IGFBP2	8469-41	SL000466	IGFBP-2	Insulin-like growth factor-binding protein 2	P18065	0.661107	0.552607	0.79091	6.05214e-06	0.00443381
HIST1H1C	2987-37	SL005256	Histone H1.2	Histone H1.2	P16403	1.49223	1.25349	1.77643	6.79512e-06	0.00443381
TOP1	2876-74	SL004305	Topoisomerase I	DNA topoisomerase 1	P11387	1.36596	1.17707	1.58516	4.0086e-05	0.0109546
PFDN5	4271-75	SL006705	PFD5	Prefoldin subunit 5	Q99471	0.758176	0.663677	0.866131	4.58218e-05	0.0109546
IL2RA	3151-6	SL003305	IL-2 sRa	Interleukin-2 receptor subunit alpha	P01589	1.33226	1.16041	1.52956	4.67248e-05	0.0109546
BMP1	3348-49	SL003994	BMP-1	Bone morphogenetic protein 1	P13497	1.39242	1.18648	1.6341	5.03661e-05	0.0109546
LAMA1 LAMB1 LAMC1	2728-62	SL000497	Laminin	Laminin	P25391, P07942, P11047	1.40643	1.18744	1.66579	7.83098e-05	0.0145992
RET	3220-40	SL010378	RET	Proto-oncogene tyrosine-protein kinase receptor Ret	P07949	1.43378	1.19415	1.72149	0.000112662	0.018378
STK17B	5249-31	SL016566	DRAK2	Serine/threonine-protein kinase 17B	O94768	1.38249	1.1687	1.63537	0.000157563	0.0228467
AIMP1	2714-78	SL003334	EMAP-2	Endothelial monocyte-activating polypeptide 2	Q12904	1.34545	1.14841	1.5763	0.000239992	0.0300507
CFH	4159-130	SL000415	Factor H	Complement factor H	P08603	1.34308	1.14619	1.57379	0.000265389	0.0300507
PROS1	2700-56	SL000049	Protein S	Vitamin K-dependent protein S	P07225	1.32766	1.13959	1.54678	0.000276329	0.0300507
H2AFZ	4163-5	SL002093	Histone H2A.z	Histone H2A.z	P0C0S5	1.33351	1.13948	1.56057	0.000333791	0.0335075
GHR	2948-58	SL005168	Growth hormone receptor	Growth hormone receptor	P10912	1.37419	1.15255	1.63845	0.000396993	0.0370055
TFPI	3336-50	SL001998	TFPI	Tissue factor pathway inhibitor	P10646	1.37522	1.15047	1.64389	0.000466163	0.0384406
UCHL1	5019-16	SL002803	PGP9.5	Ubiquitin carboxyl-terminal hydrolase isozyme L1	P09936	0.775014	0.671836	0.894038	0.000471302	0.0384406
CCL26	9168-31	SL003170	Eotaxin-3	C-C motif chemokine 26	Q9Y258	1.30612	1.12274	1.51946	0.000540708	0.0415073
IFNGR2	9180-6	SL007217	INGR2	Interferon gamma receptor 2	P38484	1.30951	1.12154	1.52898	0.000647773	0.0437992
ADIPOQ	3554-24	SL004258	Adiponectin	Adiponectin	Q15848	0.7237	0.600857	0.871657	0.000656277	0.0437992
LGMN	3622-33	SL008909	LGMN	Legumain	Q99538	1.28079	1.11055	1.47711	0.000671253	0.0437992
CRP	4337-49	SL000051	CRP	C-reactive protein	P02741	1.32993	1.12592	1.57089	0.000790906	0.0465322
HIST1H3A	14146-92	SL008158	H31	Histone H3.1	P68431	0.792531	0.69183	0.907888	0.000797311	0.0465322
CFI	2567-5	SL003328	Factor I	Complement factor I	P05156	1.3021	1.11555	1.51984	0.000820107	0.0465322
PLAT	2212-69	SL000053	tPA	Tissue-type plasminogen activator	P00750	1.30785	1.1163	1.53227	0.000894805	0.0483685
IL18R1	3446-7	SL004152	IL-18 Ra	Interleukin-18 receptor 1	Q13478	1.30983	1.11534	1.53823	0.000998359	0.0483685
MMP7	2789-26	SL000525	MMP-7	Matrilysin	P09237	1.27863	1.10426	1.48053	0.00101675	0.0483685
HSD17B1	4708-3	SL004253	17-beta-HSD 1	Estradiol 17-beta-dehydrogenase 1	P14061	1.27835	1.10392	1.48035	0.00103515	0.0483685
F9	4876-32	SL000357	Coagulation Factor IX	Coagulation factor IX	P00740	1.34798	1.12728	1.61188	0.00106294	0.0483685
CXCL12	3516-60	SL004712	SDF-1	Stromal cell-derived factor 1	P48061	0.775427	0.665745	0.903181	0.00108054	0.0483685
GSTP1	4911-49	SL003643	Glutathione S-transferase Pi	Glutathione S-transferase P	P09211	0.790861	0.686827	0.910654	0.00111192	0.0483685
Hazard ratios obtained from Cox proportional hazards models adjustments for age, sex, BMI, FPG, triglyceride level, HDL cholesterol level, eGFR, hypertension, statin use, household income, and education level. All proteins listed had q<0.05 after adjusting for the 1,305 proteins measured are bolded and italicized.

## Sheet: Supp Tbl9
Supplemental Table 9. Proteins associations with incident diabetes and triglyceride levels but not BMI, insulin resistance, or GFR.
						Incident T2D: Cox proportional hazards models adjusted for age, sex, and batch					Triglycerides					BMI					HOMA-IR					eGFR
Entrez Gene Symbol	Aptamer ID	Soma ID	Protein	Protein Full Name	UniProt ID	Hazard Ratio	95% CI Low	95% CI Upper	P	FDR q	Beta	95% CI Low	95% CI Upper	P	FDR q	Beta	95% CI Low	95% CI Upper	P	FDR q	Beta	95% CI Low	95% CI Upper	P	FDR q	Beta	95% CI Low	95% CI Upper	P	FDR q
LTA4H	3204-2	SL007100	LKHA4	Leukotriene A-4 hydrolase	P09960	0.84	0.74	0.95	0.00651	0.0316	-0.08	-0.13	-0.04	0.000455	0.00204	-0.01	-0.06	0.03	0.569	0.653	-0.04	-0.09	0.01	0.105	0.186	0.06	0	0.11	0.0331	0.0587
LTF	2780-35	SL000496	Lactoferrin	Lactotransferrin	P02788	1.18	1.04	1.35	0.0117	0.0473	-0.08	-0.13	-0.03	0.00227	0.00826	0.05	0	0.09	0.0372	0.0699	0.05	0.01	0.1	0.0258	0.0615	0.04	-0.02	0.1	0.2	0.273
LDHB	3890-8	SL000493	LDH-H 1	L-lactate dehydrogenase B chain	P07195	0.82	0.72	0.94	0.00349	0.0198	-0.1	-0.15	-0.06	4.74e-06	3.62e-05	0.04	0	0.09	0.0695	0.119	0	-0.06	0.05	0.95	0.962	0.03	-0.03	0.09	0.325	0.414
RPS3A	5484-63	SL011588	RS3A	40S ribosomal protein S3a	P61247	1.2	1.06	1.36	0.00358	0.02	0.13	0.09	0.17	1.07e-11	4.15e-10	0.02	-0.03	0.07	0.45	0.537	0.03	-0.03	0.08	0.292	0.41	0.02	-0.04	0.07	0.573	0.65
DKK1	3535-84	SL004367	DKK1	Dickkopf-related protein 1	O94907	0.83	0.74	0.94	0.00413	0.0221	-0.05	-0.1	-0.01	0.0186	0.0491	-0.05	-0.1	0	0.0535	0.0971	-0.03	-0.08	0.03	0.341	0.459	0.01	-0.04	0.07	0.634	0.704
HAMP	3504-58	SL004536	LEAP-1	Hepcidin	P81172	1.2	1.06	1.36	0.00533	0.0276	0.13	0.08	0.17	6.77e-08	8.14e-07	0.04	0	0.09	0.054	0.0976	0.03	-0.02	0.07	0.232	0.343	-0.07	-0.13	-0.01	0.0324	0.058
PDK1	5227-60	SL006921	PDK1	[Pyruvate dehydrogenase (acetyl-transferring)] kinase isozyme 1, mitochondrial	Q15118	0.82	0.71	0.95	0.00605	0.0296	-0.06	-0.11	-0.01	0.0161	0.044	-0.02	-0.07	0.03	0.479	0.566	0.02	-0.04	0.09	0.431	0.555	0.05	0	0.11	0.0622	0.102
F10	4878-3	SL000360	Coagulation Factor X	Coagulation Factor X	P00742	1.2	1.04	1.37	0.0104	0.0434	0.15	0.1	0.21	1.74e-07	1.9e-06	-0.03	-0.07	0.02	0.195	0.279	0.05	0	0.1	0.0394	0.0866	-0.01	-0.06	0.05	0.848	0.88
Hazard ratios obtained from Cox proportional hazards models and betas obtained from linear regression models adjusted for age, sex, and batch. FDR q values that are <0.05 after adjusting for the 1,305 proteins measured are bolded and italicized.

## Sheet: Supp Tb7
Supplemental Table 7. Proteins associations with incident and prevalent diabetes that are not associated with measures of adiposity, glycemia, insulin resistance, and triglyceredemia.
						Incident T2D: Cox proportional hazards models adjusted for age, sex, and batch					Prevalent T2D: Logistic regression models adjusted for age, sex, and batch					BMI					FPG					HOMA-IR					Triglycerides					eGFR
Entrez Gene Symbol	Aptamer ID	Soma ID	Protein Name	Protein Full Name	UniProt ID	Hazard Ratio	95% CI Low	95% CI Upper	P	FDR q	Odds Ratio	95% CI Low	95% CI Upper	P	FDR q	Beta	95% CI Low	95% CI Upper	P	FDR q	Beta	95% CI Low	95% CI Upper	P	FDR q	Beta	95% CI Low	95% CI Upper	P	FDR q	Beta	95% CI Low	95% CI Upper	P	FDR q	Beta	95% CI Low	95% CI Upper	P	FDR q
APP	3171-57	SL004469	amyloid precursor protein	Amyloid beta A4 protein	P05067	0.73	0.64	0.83	2.74e-06	6.05e-05	0.92	0.82	1.03	0.137	0.296	-0.04	-0.08	0.01	0.147	0.221	-0.05	-0.11	0.01	0.0783	0.196	-0.06	-0.11	-0.01	0.0277	0.0651	-0.04	-0.09	0.01	0.113	0.221	0.09	0.03	0.15	0.00405	0.00978
VEGFC	3132-1	SL004486	VEGF-C	Vascular endothelial growth factor C	P49767	0.74	0.64	0.85	2.47e-05	0.000413	1.14	1.02	1.26	0.0179	0.063	-0.01	-0.05	0.04	0.822	0.864	0.02	-0.04	0.07	0.552	0.736	-0.02	-0.07	0.02	0.317	0.435	-0.04	-0.1	0.02	0.15	0.279	-0.07	-0.13	0	0.0386	0.0666
ANGPT1	2811-27	SL001995	Angiopoietin-1	Angiopoietin-1	Q15389	0.77	0.68	0.87	4.61e-05	0.000707	1.07	0.96	1.19	0.208	0.395	0.03	-0.01	0.08	0.177	0.258	0.03	-0.02	0.08	0.309	0.522	-0.02	-0.07	0.03	0.376	0.499	0.01	-0.03	0.04	0.787	0.867	0.03	-0.03	0.09	0.34	0.429
UCHL1	5019-16	SL002803	PGP9.5	Ubiquitin carboxyl-terminal hydrolase isozyme L1	P09936	0.76	0.66	0.87	5.24e-05	0.00076	0.89	0.8	0.99	0.0301	0.0936	0.01	-0.04	0.06	0.805	0.852	-0.06	-0.11	-0.01	0.0156	0.0528	0.01	-0.04	0.06	0.777	0.837	-0.04	-0.09	0	0.0791	0.168	0.12	0.06	0.17	7.57e-05	0.000289
STUB1	10336-3	SL019100	CHIP	E3 ubiquitin-protein ligase CHIP	Q9UNE7	0.78	0.69	0.88	0.000101	0.00125	0.99	0.89	1.1	0.824	0.908	0.04	0	0.09	0.0758	0.127	0.01	-0.04	0.06	0.664	0.81	0	-0.05	0.05	0.959	0.968	-0.03	-0.07	0.02	0.269	0.436	0.05	-0.01	0.11	0.114	0.171
PPBP	2790-54	SL003191	NAP-2	Neutrophil-activating peptide 2	P02775	0.77	0.68	0.88	0.000118	0.00143	1.06	0.95	1.17	0.315	0.515	0.02	-0.03	0.07	0.398	0.486	0.01	-0.04	0.07	0.667	0.811	0	-0.06	0.06	0.895	0.924	0	-0.05	0.04	0.87	0.918	0.08	0.02	0.14	0.00609	0.0139
PPBP	4544-4	SL004708	CTAP-III	Connective tissue-activating peptide III	P02775	0.77	0.68	0.88	0.000116	0.00143	1.06	0.95	1.18	0.291	0.49	0.02	-0.03	0.07	0.373	0.464	0.01	-0.04	0.07	0.654	0.808	0	-0.06	0.06	0.905	0.931	0	-0.05	0.04	0.84	0.899	0.08	0.02	0.14	0.00933	0.0196
CCL5	5480-49	SL000563	RANTES	C-C motif chemokine 5	P13501	0.78	0.68	0.88	0.000132	0.00155	1.02	0.92	1.14	0.65	0.795	0.02	-0.03	0.07	0.473	0.56	0	-0.06	0.05	0.874	0.931	-0.02	-0.08	0.04	0.529	0.638	-0.01	-0.05	0.03	0.668	0.776	0.13	0.07	0.2	1.59e-05	6.91e-05
PDGFA	4499-21	SL000535	PDGF-AA	Platelet-derived growth factor subunit A	P04085	0.77	0.68	0.88	0.000131	0.00155	1.03	0.93	1.15	0.574	0.742	0.02	-0.03	0.07	0.404	0.492	0.01	-0.04	0.06	0.708	0.839	-0.02	-0.08	0.04	0.469	0.588	0	-0.05	0.05	0.913	0.947	0.09	0.03	0.15	0.00213	0.00562
PF4	2697-7	SL003041	PF-4	Platelet factor 4	P02776	0.78	0.68	0.88	0.000153	0.00178	1.06	0.95	1.18	0.296	0.495	0.03	-0.02	0.08	0.28	0.37	0.01	-0.04	0.07	0.602	0.769	-0.01	-0.07	0.04	0.617	0.714	-0.01	-0.06	0.03	0.565	0.707	0.1	0.04	0.16	0.00161	0.00432
LRRTM1	4452-9	SL014096	LRRT1	Leucine-rich repeat transmembrane neuronal protein 1	Q86UE6	1.27	1.12	1.43	0.000209	0.00231	0.95	0.85	1.05	0.33	0.53	0.05	0	0.1	0.0302	0.0581	-0.02	-0.07	0.03	0.496	0.695	0.03	-0.02	0.07	0.24	0.353	0	-0.06	0.05	0.93	0.953	-0.02	-0.08	0.05	0.606	0.68
FGF17	3494-71	SL004335	FGF-17	Fibroblast growth factor 17	O60258	1.27	1.12	1.44	0.000217	0.00236	0.98	0.88	1.09	0.658	0.799	0.05	0	0.1	0.0348	0.066	0.01	-0.04	0.06	0.758	0.863	0.04	-0.02	0.09	0.166	0.265	0.03	-0.02	0.09	0.231	0.39	0.09	0.03	0.15	0.00487	0.0114
SPARC	3043-49	SL000532	ON	SPARC	P09486	0.77	0.67	0.89	0.00024	0.00256	1.01	0.91	1.13	0.816	0.904	0.03	-0.02	0.08	0.209	0.294	0	-0.06	0.05	0.874	0.931	-0.01	-0.06	0.05	0.82	0.871	-0.04	-0.08	0.01	0.147	0.275	0.16	0.1	0.22	1.3e-07	7.48e-07
SCARF1	5129-12	SL005221	SREC-I	Scavenger receptor class F member 1	Q14162	0.78	0.68	0.89	0.000276	0.00293	1.07	0.96	1.19	0.234	0.427	0.05	0	0.09	0.0642	0.112	-0.02	-0.08	0.04	0.449	0.654	-0.03	-0.09	0.02	0.198	0.302	-0.01	-0.05	0.03	0.683	0.785	-0.21	-0.27	-0.15	1.8e-10	1.37e-09
PAFAH1B2	2642-4	SL004760	PAFAH beta subunit	Platelet-activating factor acetylhydrolase IB subunit beta	P68402	0.77	0.67	0.89	0.000324	0.00331	0.97	0.88	1.08	0.615	0.771	-0.03	-0.07	0.02	0.28	0.37	-0.03	-0.09	0.04	0.415	0.626	-0.03	-0.09	0.02	0.229	0.339	-0.03	-0.09	0.02	0.246	0.409	-0.05	-0.11	0.02	0.153	0.216
PDGFB	4149-8	SL000537	PDGF-BB	Platelet-derived growth factor subunit B	P01127	0.78	0.69	0.9	0.000384	0.00379	1.08	0.97	1.19	0.168	0.341	0.03	-0.02	0.08	0.254	0.345	0.02	-0.03	0.07	0.44	0.649	-0.02	-0.07	0.04	0.529	0.638	0.01	-0.03	0.06	0.605	0.733	0.09	0.03	0.15	0.00563	0.013
IL2RA	3151-6	SL003305	IL-2 sRa	Interleukin-2 receptor subunit alpha	P01589	1.26	1.11	1.43	0.000441	0.0043	0.8	0.72	0.89	3.04e-05	0.000261	-0.01	-0.06	0.04	0.704	0.775	-0.04	-0.09	0.01	0.119	0.262	0.03	-0.03	0.08	0.327	0.446	0	-0.04	0.04	0.998	0.998	-0.02	-0.08	0.04	0.434	0.523
THBS1	3474-19	SL002705	Thrombospondin-1	Thrombospondin-1	P07996	0.79	0.7	0.9	0.000528	0.00489	1.09	0.98	1.21	0.117	0.261	0.04	-0.01	0.09	0.129	0.199	0.02	-0.03	0.08	0.422	0.633	0.01	-0.04	0.06	0.757	0.823	0.02	-0.03	0.07	0.461	0.619	0.09	0.03	0.15	0.00224	0.00584
ERBB4	2618-10	SL003803	ERBB4	Receptor tyrosine-protein kinase erbB-4	Q15303	1.22	1.09	1.37	0.000598	0.00538	0.95	0.86	1.06	0.358	0.552	0.02	-0.03	0.07	0.419	0.506	0	-0.04	0.05	0.892	0.941	0.03	-0.02	0.07	0.304	0.421	0.05	0	0.09	0.0553	0.124	0.06	0	0.13	0.0428	0.0734
PFDN5	4271-75	SL006705	PFD5	Prefoldin subunit 5	Q99471	0.8	0.7	0.91	0.000784	0.00673	1.05	0.95	1.17	0.347	0.546	0.05	0	0.09	0.0562	0.101	0.03	-0.02	0.08	0.217	0.407	-0.01	-0.07	0.04	0.6	0.7	-0.04	-0.08	0	0.0366	0.0878	0.03	-0.03	0.09	0.304	0.393
KLK5	3201-49	SL003863	kallikrein 5	Kallikrein-5	Q9Y337	1.24	1.09	1.41	0.000812	0.00674	1.03	0.93	1.15	0.553	0.729	0.03	-0.02	0.07	0.281	0.372	0.03	-0.01	0.08	0.157	0.322	0.02	-0.03	0.07	0.384	0.507	0.04	-0.01	0.1	0.0902	0.186	0.01	-0.06	0.07	0.869	0.898
KPNB1	3887-90	SL010927	IMB1	Importin subunit beta-1	Q14974	0.8	0.7	0.91	0.000907	0.00726	1.04	0.94	1.16	0.41	0.604	0.02	-0.02	0.07	0.333	0.425	0.01	-0.04	0.06	0.668	0.811	0.01	-0.05	0.07	0.751	0.82	0.01	-0.04	0.05	0.758	0.847	0.04	-0.02	0.1	0.165	0.232
TNF	5936-53	SL002517	TNF-a	Tumor necrosis factor	P01375	1.23	1.09	1.39	0.00106	0.00837	1.04	0.94	1.15	0.472	0.662	0.05	0	0.09	0.0494	0.0905	0.02	-0.03	0.06	0.444	0.651	0.03	-0.01	0.08	0.156	0.252	0.05	0	0.09	0.0603	0.133	-0.1	-0.15	-0.04	0.000526	0.00163
PPIF	5248-68	SL005793	Cyclophilin F	Peptidyl-prolyl cis-trans isomerase F, mitochondrial	P30405	0.8	0.7	0.91	0.00109	0.00844	1	0.91	1.11	0.94	0.964	0.02	-0.03	0.07	0.433	0.519	0.01	-0.04	0.05	0.838	0.912	0.01	-0.05	0.06	0.739	0.81	-0.02	-0.06	0.02	0.238	0.398	0.05	-0.01	0.11	0.0972	0.148
CXCL1	2985-35	SL003173	Gro-a	Growth-regulated alpha protein	P09341	0.8	0.71	0.92	0.00112	0.00853	1.04	0.94	1.15	0.449	0.642	0.02	-0.02	0.07	0.322	0.414	0.02	-0.03	0.08	0.375	0.587	0.01	-0.04	0.07	0.635	0.728	0	-0.04	0.04	0.904	0.941	0.03	-0.03	0.08	0.36	0.449
PROK1	2247-20	SL004332	EG-VEGF	Prokineticin-1	P58294	1.22	1.08	1.38	0.00132	0.00978	1.03	0.92	1.14	0.631	0.78	0.01	-0.04	0.06	0.819	0.862	-0.01	-0.06	0.05	0.802	0.891	0.02	-0.02	0.07	0.27	0.387	-0.01	-0.06	0.03	0.585	0.722	0.03	-0.03	0.09	0.317	0.407
ANXA6	5335-73	SL003647	annexin VI	Annexin A6	P08133	0.81	0.72	0.92	0.0015	0.0107	1.05	0.95	1.17	0.348	0.546	0.04	-0.01	0.09	0.0954	0.155	0.01	-0.04	0.06	0.815	0.897	-0.01	-0.07	0.04	0.62	0.716	-0.02	-0.07	0.03	0.363	0.528	0.1	0.03	0.16	0.00233	0.00603
BIRC5	3472-40	SL000582	Survivin	Baculoviral IAP repeat-containing protein 5	O15392	1.24	1.08	1.41	0.00165	0.0114	0.96	0.87	1.07	0.501	0.686	0.02	-0.03	0.07	0.414	0.502	0.01	-0.04	0.06	0.738	0.853	0.01	-0.04	0.06	0.638	0.729	0.04	-0.01	0.08	0.129	0.247	0.1	0.04	0.17	0.00127	0.00357
ACVRL1	2969-11	SL004851	ALK-1	Serine/threonine-protein kinase receptor R3	P37023	0.8	0.7	0.92	0.00166	0.0114	0.95	0.86	1.06	0.387	0.58	-0.03	-0.07	0.02	0.23	0.32	0	-0.06	0.05	0.859	0.927	-0.06	-0.11	0	0.0354	0.0794	-0.02	-0.06	0.02	0.323	0.492	0.05	-0.01	0.11	0.116	0.171
UBB	6641-60	SL017289	PolyUbiquitin K48	PolyUbiquitin K48-linked	P0CG47	1.23	1.08	1.39	0.00171	0.0116	0.96	0.86	1.07	0.452	0.643	-0.02	-0.07	0.03	0.394	0.483	-0.01	-0.06	0.04	0.719	0.843	0.02	-0.03	0.06	0.537	0.644	0.05	0	0.1	0.0568	0.127	-0.02	-0.08	0.04	0.561	0.642
CASP3	3593-72	SL003711	Caspase-3	Caspase-3	P42574	0.81	0.71	0.93	0.00199	0.0129	1.03	0.93	1.14	0.598	0.758	0.03	-0.02	0.08	0.286	0.378	-0.01	-0.05	0.04	0.813	0.896	0.02	-0.04	0.08	0.553	0.657	-0.02	-0.06	0.02	0.383	0.546	0.03	-0.03	0.09	0.352	0.44
FASLG	3052-8	SL000633	Fas ligand, soluble	Tumor necrosis factor ligand superfamily member 6, soluble form	P48023	0.82	0.72	0.93	0.00248	0.0155	0.94	0.85	1.05	0.264	0.46	-0.01	-0.06	0.04	0.653	0.729	-0.05	-0.1	-0.01	0.0248	0.0779	-0.05	-0.1	0.01	0.0922	0.169	-0.02	-0.06	0.02	0.33	0.5	0.01	-0.05	0.07	0.73	0.782
BCAR3	5262-57	SL014470	BCAR3	Breast cancer anti-estrogen resistance protein 3	O75815	1.22	1.07	1.38	0.00266	0.0162	0.89	0.8	0.99	0.0341	0.103	0.02	-0.03	0.07	0.408	0.495	-0.02	-0.07	0.02	0.361	0.573	0.05	0.01	0.1	0.0275	0.0648	0.05	0.01	0.09	0.0229	0.0585	0.09	0.03	0.15	0.00498	0.0116
EPS15L1	4212-5	SL012188	EP15R	Epidermal growth factor receptor substrate 15-like 1	Q9UBC2	0.83	0.73	0.94	0.00275	0.0165	0.98	0.89	1.09	0.762	0.874	0.05	0	0.1	0.0437	0.0812	-0.02	-0.07	0.03	0.401	0.612	0.01	-0.05	0.06	0.815	0.867	0.01	-0.03	0.05	0.629	0.753	-0.03	-0.09	0.03	0.327	0.417
PRKACA	3466-8	SL010513	PRKACA	cAMP-dependent protein kinase catalytic subunit alpha	P17612	0.83	0.73	0.94	0.00311	0.0184	1.03	0.93	1.14	0.521	0.702	0.05	-0.01	0.1	0.0824	0.137	0.01	-0.04	0.06	0.664	0.81	0.02	-0.04	0.07	0.542	0.648	-0.01	-0.05	0.04	0.797	0.875	0.03	-0.03	0.09	0.34	0.429
GRB2	5464-52	SL003792	GRB2 adapter protein	Growth factor receptor-bound protein 2	P62993	0.83	0.73	0.94	0.00342	0.0195	1.07	0.97	1.18	0.201	0.387	0.04	-0.01	0.1	0.111	0.177	0.02	-0.03	0.07	0.445	0.652	0.03	-0.03	0.09	0.353	0.472	0	-0.04	0.05	0.94	0.959	0.01	-0.05	0.07	0.684	0.744
SNCA	8458-111	SL005266	a-Synuclein	Alpha-synuclein	P37840	0.82	0.72	0.94	0.00377	0.0207	0.94	0.85	1.04	0.236	0.428	-0.02	-0.07	0.02	0.361	0.453	-0.02	-0.08	0.03	0.392	0.603	0.03	-0.03	0.08	0.371	0.494	0.03	-0.03	0.08	0.386	0.548	0.06	0	0.12	0.0338	0.0596
NSFL1C	4250-23	SL006268	NSF1C	NSFL1 cofactor p47	Q9UNZ2	0.83	0.74	0.94	0.00387	0.0211	1.06	0.96	1.17	0.276	0.476	0.04	-0.01	0.08	0.159	0.237	-0.01	-0.06	0.04	0.706	0.839	0.01	-0.05	0.07	0.775	0.836	0.01	-0.03	0.05	0.587	0.722	-0.08	-0.13	-0.02	0.0106	0.0222
RAC3	5271-5	SL007310	RAC3	Ras-related C3 botulinum toxin substrate 3	P60763	0.82	0.72	0.94	0.00407	0.0219	0.96	0.87	1.06	0.391	0.585	-0.04	-0.09	0.01	0.128	0.197	-0.02	-0.07	0.02	0.336	0.547	0.01	-0.04	0.07	0.662	0.748	-0.02	-0.08	0.05	0.641	0.76	0.08	0.02	0.14	0.00685	0.0153
ICAM1	4342-10	SL002922	sICAM-1	Intercellular adhesion molecule 1	P05362	1.22	1.06	1.41	0.00497	0.0258	1.02	0.92	1.14	0.668	0.807	-0.01	-0.06	0.03	0.55	0.634	0.06	0.01	0.11	0.0193	0.0635	0	-0.05	0.05	0.925	0.948	-0.04	-0.09	0.01	0.0864	0.18	0.14	0.09	0.2	3.04e-07	1.68e-06
YWHAZ	5858-6	SL005688	14-3-3 protein zeta/delta	14-3-3 protein zeta/delta	P63104	0.83	0.73	0.95	0.00592	0.0293	0.97	0.88	1.08	0.599	0.759	0.05	0	0.1	0.0743	0.125	-0.01	-0.05	0.04	0.725	0.845	0.03	-0.03	0.09	0.327	0.446	-0.02	-0.06	0.02	0.275	0.443	0.11	0.05	0.16	0.000186	0.000642
CFL1	4203-50	SL004920	Cofilin-1	Cofilin-1	P23528	0.82	0.71	0.95	0.00632	0.0308	0.95	0.86	1.05	0.337	0.539	0	-0.05	0.05	0.951	0.965	-0.03	-0.07	0.02	0.245	0.447	-0.02	-0.07	0.04	0.508	0.624	-0.02	-0.06	0.02	0.312	0.482	0.05	-0.01	0.11	0.118	0.174
ABL2	5261-13	SL010488	ABL2	Abelson tyrosine-protein kinase 2	P42684	1.19	1.05	1.35	0.00757	0.0356	0.87	0.79	0.97	0.0112	0.043	0.03	-0.02	0.07	0.276	0.368	-0.04	-0.09	0	0.0503	0.14	0.05	0	0.1	0.0479	0.102	0.04	0	0.08	0.0438	0.102	0.07	0.01	0.13	0.0227	0.0429
CA13	3420-21	SL004869	Carbonic anhydrase XIII	Carbonic anhydrase 13	Q8N1Q1	0.83	0.72	0.95	0.0079	0.0367	0.97	0.88	1.07	0.539	0.72	-0.03	-0.08	0.02	0.325	0.417	-0.03	-0.07	0.02	0.205	0.392	-0.02	-0.08	0.05	0.622	0.717	-0.02	-0.07	0.02	0.268	0.435	0.06	0	0.11	0.0574	0.095
GP6	3194-36	SL008759	GPVI	Platelet glycoprotein VI	Q9HCN6	0.83	0.73	0.95	0.00822	0.0374	1.04	0.94	1.15	0.481	0.67	0.05	0	0.1	0.0657	0.114	0	-0.05	0.06	0.924	0.954	0.03	-0.03	0.09	0.302	0.419	-0.02	-0.07	0.04	0.561	0.705	-0.04	-0.1	0.02	0.224	0.302
IL4R	3055-54	SL003308	IL-4 sR	Interleukin-4 receptor subunit alpha	P24394	1.17	1.04	1.32	0.00903	0.0398	0.99	0.89	1.09	0.819	0.906	0.04	-0.01	0.08	0.115	0.18	0	-0.05	0.05	0.989	0.993	0.01	-0.04	0.07	0.612	0.712	-0.04	-0.09	0.02	0.165	0.3	0	-0.06	0.06	0.973	0.984
CSNK2A1 CSNK2B	5225-50	SL016550	CK2-A1:B	Casein kinase II 2-alpha:2-beta heterotetramer	P68400 P67870	0.84	0.73	0.96	0.00932	0.0401	0.98	0.88	1.08	0.677	0.817	0.03	-0.02	0.08	0.218	0.306	-0.01	-0.07	0.05	0.741	0.853	0	-0.05	0.06	0.943	0.96	0.01	-0.05	0.06	0.78	0.863	0.07	0.01	0.13	0.0211	0.0403
ENO2	10339-48	SL001731	NSE	Gamma-enolase	P09104	0.85	0.75	0.96	0.00959	0.0409	1.01	0.92	1.12	0.787	0.886	-0.02	-0.07	0.03	0.457	0.544	-0.03	-0.07	0.01	0.153	0.315	-0.02	-0.07	0.03	0.458	0.578	-0.02	-0.07	0.02	0.229	0.388	0.03	-0.03	0.09	0.333	0.422
CCL1	2770-51	SL003176	I-309	C-C motif chemokine 1	P22362	1.19	1.04	1.35	0.00975	0.0414	1.1	0.99	1.23	0.0773	0.192	0.04	-0.01	0.08	0.113	0.179	0.05	0	0.1	0.0689	0.179	-0.01	-0.06	0.04	0.586	0.686	-0.01	-0.06	0.04	0.633	0.756	0	-0.05	0.06	0.917	0.939
SNX4	3903-49	SL005372	Sorting nexin 4	Sorting nexin-4	O95219	0.84	0.74	0.96	0.00996	0.0421	1.03	0.93	1.14	0.556	0.73	0.06	0	0.11	0.0404	0.0754	0.01	-0.04	0.06	0.597	0.769	0.04	-0.02	0.1	0.211	0.317	0.01	-0.04	0.05	0.787	0.867	0.02	-0.04	0.08	0.571	0.649
FGF6	4130-71	SL004340	FGF-6	Fibroblast growth factor 6	P10767	0.85	0.75	0.96	0.012	0.0481	1.01	0.91	1.12	0.881	0.932	0.05	0.01	0.1	0.029	0.0561	0	-0.06	0.05	0.943	0.967	0.01	-0.05	0.06	0.856	0.895	0.03	-0.03	0.09	0.365	0.53	0.07	0.01	0.13	0.0235	0.0439
ATP5O	9202-309	SL008113	ATPO	ATP synthase subunit O, mitochondrial	P48047	0.83	0.72	0.96	0.0123	0.0493	1.07	0.97	1.19	0.191	0.373	0	-0.04	0.05	0.95	0.964	0.02	-0.04	0.07	0.553	0.736	0.02	-0.03	0.07	0.426	0.55	0.01	-0.03	0.06	0.526	0.675	0.03	-0.03	0.08	0.364	0.451
Hazard ratios obtained from Cox proportional hazards models, odds ratio obtained from logistic regression, and betas obtained from linear regression models adjusted for age, sex, and batch. FDR q values that are <0.05 after adjusting for the 1,305 proteins measured are bolded and italicized.

## Sheet: Supp Tbl8
Supplemental Table 8. Proteins associations with incident diabetes and BMI but not insulin resistance or GFR.
						Incident T2D: Cox proportional hazards models adjusted for age, sex, and batch					BMI					HOMA-IR					eGFR
Entrez Gene Symbol	Aptamer ID	Soma ID	Protein Name	Protein Full Name	UniProt ID	Hazard Ratio	95% CI Low	95% CI Upper	P	FDR q	Beta	95% CI Low	95% CI Upper	P	FDR q	Beta	95% CI Low	95% CI Upper	P	FDR q	Beta	95% CI Low	95% CI Upper	P	FDR q
H2AFZ	4163-5	SL002093	Histone H2A.z	Histone H2A.z	P0C0S5	1.34	1.18	1.53	9.96e-06	0.000186	0.1	0.05	0.14	5.42e-05	0.000192	0.05	0	0.1	0.052	0.108	-0.03	-0.08	0.03	0.374	0.463
PSPN	2696-87	SL004685	Persephin	Persephin	O60542	1.29	1.12	1.49	0.000384	0.00379	0.12	0.08	0.17	6.52e-09	3.7e-08	0.05	0	0.1	0.037	0.0823	0.01	-0.04	0.07	0.678	0.74
SIGLEC6	2741-22	SL005217	Siglec-6	Sialic acid-binding Ig-like lectin 6	O43699	1.26	1.1	1.44	0.000801	0.00674	0.07	0.02	0.12	0.00388	0.00958	0.05	0	0.11	0.0523	0.109	0.02	-0.04	0.07	0.565	0.644
CDH1	2501-51	SL000055	Cadherin E	Cadherin-1	P12830	1.26	1.1	1.44	0.00109	0.00844	-0.14	-0.19	-0.09	1.95e-08	1.05e-07	0.03	-0.02	0.08	0.273	0.39	0.02	-0.04	0.08	0.559	0.641
ADAMTS4	2809-25	SL004625	ADAMTS-4	A disintegrin and metalloproteinase with thrombospondin motifs 4	O75173	1.22	1.08	1.38	0.00133	0.0098	0.06	0.02	0.11	0.00749	0.0171	0.04	-0.01	0.08	0.136	0.227	-0.02	-0.08	0.04	0.539	0.626
DYRK3	4359-87	SL013570	DYRK3	Dual specificity tyrosine-phosphorylation-regulated kinase 3	O43781	1.22	1.06	1.39	0.00406	0.0219	0.1	0.05	0.14	3.33e-05	0.000121	0.05	0	0.1	0.0424	0.092	0.02	-0.04	0.08	0.552	0.636
XPNPEP1	3481-87	SL011073	XPNPEP1	Xaa-Pro aminopeptidase 1	Q9NQW7	0.84	0.74	0.95	0.00578	0.0288	0.08	0.03	0.13	0.00355	0.0088	0.05	0	0.11	0.0603	0.121	0.03	-0.03	0.09	0.279	0.365
YWHAB	14156-33	SL004815	14-3-3 protein beta/alpha	14-3-3 protein beta/alpha	P31946	0.84	0.73	0.96	0.00843	0.0379	0.08	0.03	0.13	0.00172	0.00463	0.05	-0.01	0.11	0.077	0.147	0.06	0	0.11	0.0452	0.0769
CD207	3361-26	SL010610	CLC4K	C-type lectin domain family 4 member K	Q9UJ71	1.18	1.04	1.34	0.00845	0.0379	0.06	0.01	0.1	0.0125	0.0268	0.05	0	0.1	0.0425	0.092	0.01	-0.05	0.07	0.725	0.778
SAA1	4336-2	SL000572	SAA	Serum amyloid A-1 protein	P0DJI8	1.21	1.05	1.39	0.00909	0.0399	0.11	0.06	0.15	1.36e-05	5.24e-05	0.05	0	0.09	0.0629	0.125	-0.06	-0.12	-0.01	0.0282	0.0511
PDE4D	5255-22	SL011404	PDE4D	cAMP-specific 3',5'-cyclic phosphodiesterase 4D	Q08499	1.18	1.04	1.34	0.0101	0.0422	0.05	0.01	0.1	0.0193	0.0397	0.03	-0.02	0.08	0.256	0.372	0.04	-0.01	0.1	0.118	0.174
PTPN6	4318-12	SL004940	PTP-1C	Tyrosine-protein phosphatase non-receptor type 6	P29350	0.84	0.74	0.96	0.0102	0.0428	0.08	0.03	0.14	0.00177	0.00474	0.04	-0.01	0.09	0.149	0.245	0.02	-0.04	0.08	0.509	0.597
Hazard ratios obtained from Cox proportional hazards models and betas obtained from linear regression models adjusted for age, sex, and batch. FDR q values that are <0.05 after adjusting for the 1,305 proteins measured are bolded and italicized.

## Sheet: Supp Tbl10
Supplemental Table 10. Proteins associated with both incident and prevalent T2D.
						Incident T2D: Cox proportional hazards models adjusted for age, sex, and batch					Prevalent T2D: Logistic regression models adjusted for age, sex, and batch
Entrez Gene Symbol	Aptamer ID	Soma ID	Protein	Protein Full Name	UniProt ID	Hazard Ratio	95% CI Low	95% CI Upper	P	FDR q	Odds Ratio	95% CI Low	95% CI Upper	P	FDR q
FABP3	5437-63	SL001774	FABP	Fatty acid-binding protein, heart	P05413	1.8171	1.56978	2.10338	1.33e-15	2.48e-13	2.04144	1.78792	2.33091	0	0
IL18R1	3446-7	SL004152	IL-18 Ra	Interleukin-18 receptor 1	Q13478	1.61764	1.41908	1.84399	6.1e-13	8.85e-11	1.91274	1.69134	2.16312	0	0
APOM	14125-5	SL004747	ApoM	Apolipoprotein M	O95445	0.666879	0.584793	0.760487	1.49e-09	8.45e-08	0.615509	0.550395	0.688326	0	0
INS	4883-56	SL000021	Insulin	Insulin	P01308	1.49591	1.31069	1.70731	2.35e-09	1.28e-07	1.88533	1.6689	2.12982	0	0
SHBG	4929-55	SL005102	SHBG	Sex hormone-binding globulin	P04278	0.634926	0.546614	0.737507	2.77e-09	1.45e-07	0.587716	0.518823	0.665758	0	0
UBE2G2	9199-6	SL018946	UB2G2	Ubiquitin-conjugating enzyme E2 G2	P60604	1.47195	1.2921	1.67684	6.09e-09	2.78e-07	1.83901	1.63425	2.06943	0	0
TYK2	5260-80	SL007181	TYK2	Non-receptor tyrosine-protein kinase TYK2	P29597	1.42852	1.25015	1.63234	1.6e-07	5.49e-06	1.6359	1.45667	1.8372	0	0
ESM1	3805-16	SL010458	Endocan	Endothelial cell-specific molecule 1	Q9NQ30	0.695269	0.605629	0.798178	2.46e-07	8.02e-06	0.549554	0.485064	0.622619	0	0
TNFAIP6	5036-50	SL004782	TSG-6	Tumor necrosis factor-inducible gene 6 protein	P98066	0.679108	0.586012	0.786993	2.69e-07	8.55e-06	0.504844	0.444653	0.573184	0	0
ANGPT2	2602-2	SL001996	Angiopoietin-2	Angiopoietin-2	O15123	1.38521	1.21823	1.57507	6.63e-07	1.84e-05	1.71766	1.5259	1.93352	0	0
ERP29	4983-6	SL003522	ERP29	Endoplasmic reticulum resident protein 29	P30040	1.40257	1.22559	1.60511	8.84e-07	2.35e-05	1.72911	1.54015	1.94125	0	0
C2	3186-2	SL002525	C2	Complement C2	P06681	1.33514	1.14233	1.5605	0.000281016	0.00295747	2.01444	1.76547	2.29852	0	0
NCAM1	4498-62	SL003764	NCAM-120	Neural cell adhesion molecule 1, 120 kDa isoform	P13591	0.769881	0.668268	0.886946	0.000293286	0.0030376	0.589618	0.52497	0.662227	0	0
PLXNB2	9216-100	SL009948	PLXB2	Plexin-B2	O15031	1.2026	1.05198	1.37478	0.00688887	0.0329023	2.46009	2.13831	2.8303	0	0
BCAN	3461-58	SL009089	PGCB	Brevican core protein	Q96GW7	0.775002	0.670431	0.895883	0.000567562	0.0051795	0.615853	0.548858	0.691026	2.2204e-16	1.39779e-14
WIF1	2848-2	SL004652	WIF-1	Wnt inhibitory factor 1	Q9Y5W5	0.789921	0.690223	0.904019	0.000612968	0.00544165	0.614189	0.547101	0.689503	2.2204e-16	1.39779e-14
IL1RN	5353-89	SL001990	IL-1Ra	Interleukin-1 receptor antagonist protein	P18510	1.55279	1.34885	1.78755	9.02e-10	5.61e-08	1.63612	1.4523	1.84322	6.6613e-16	4.00284e-14
LAMA1 LAMB1 LAMC1	2728-62	SL000497	Laminin	Laminin	P25391, P07942, P11047	1.57742	1.38758	1.79322	3.24e-12	3.25e-10	1.57973	1.41149	1.76802	1.77636e-15	9.78478e-14
CTSD	5508-62	SL000344	Cathepsin D	Cathepsin D	P07339	1.23627	1.08104	1.41379	0.00194618	0.0127024	1.56738	1.40183	1.75247	3.10862e-15	1.64384e-13
EHMT2	5843-60	SL003542	NG36	Histone-lysine N-methyltransferase EHMT2	Q96KQ7	0.674473	0.590586	0.770276	6.19e-09	2.78e-07	0.633896	0.565654	0.710371	4.44089e-15	2.25802e-13
GSN	4775-34	SL005572	Gelsolin	Gelsolin	P06396	0.777515	0.67502	0.895573	0.000484545	0.00463425	0.612883	0.54196	0.693087	5.9952e-15	2.83059e-13
F9	4876-32	SL000357	Coagulation Factor IX	Coagulation factor IX	P00740	1.75445	1.53583	2.00419	2.22e-16	7.24e-14	1.62097	1.43331	1.83321	1.42109e-14	6.26225e-13
F9	5307-12	SL004400	Coagulation Factor IXab	Coagulation factor IXab	P00740	1.71	1.50446	1.94362	2.22e-16	7.24e-14	1.61009	1.42439	1.82001	2.59792e-14	1.10789e-12
IGFBP2	8469-41	SL000466	IGFBP-2	Insulin-like growth factor-binding protein 2	P18065	0.56313	0.48916	0.648287	1.33e-15	2.48e-13	0.612903	0.539125	0.696777	7.37188e-14	3.04551e-12
BMPR1A	4859-6	SL004080	BMPR1A	Bone morphogenetic protein receptor type-1A	P36894	0.71842	0.628591	0.821086	1.22e-06	3.06e-05	0.650197	0.580674	0.728044	8.59313e-14	3.44246e-12
UNC5D	5140-56	SL005231	UNC5H4	Netrin receptor UNC5D	Q6UXZ4	0.691205	0.609632	0.783692	8.21e-09	3.57e-07	0.644046	0.573113	0.723758	1.46549e-13	5.69819e-12
CTSS	3181-50	SL004673	Cathepsin S	Cathepsin S	P25774	1.18579	1.04177	1.34971	0.00989582	0.0419287	1.51971	1.35949	1.69882	1.803e-13	6.8102e-12
PIANP	14114-18	SL019019	PIANP	PILR alpha-associated neural protein	Q8IYJ0	0.766091	0.669873	0.876129	9.98e-05	0.00125173	0.6352	0.562467	0.717338	2.58904e-13	9.50753e-12
CXCL12	3516-60	SL004712	SDF-1	Stromal cell-derived factor 1	P48061	0.682548	0.597787	0.779327	1.65e-08	6.73e-07	0.65364	0.582412	0.733581	5.09148e-13	1.81917e-11
LEP	8484-24	SL000498	Leptin	Leptin	P41159	1.97807	1.63604	2.39159	1.89e-12	2.05e-10	1.67307	1.45288	1.92662	8.77964e-13	3.05439e-11
MAP2K4	5242-37	SL007237	MP2K4	Dual specificity mitogen-activated protein kinase kinase 4	P45985	0.79696	0.690374	0.920001	0.00194673	0.0127024	0.665203	0.593144	0.746016	3.19655e-12	1.02796e-10
ACAN	3280-49	SL004661	Aggrecan	Aggrecan core protein	P16112	0.806954	0.70579	0.922618	0.00169845	0.0116046	0.653388	0.579117	0.737184	4.75509e-12	1.46191e-10
MIA	2687-2	SL001947	MIA	Melanoma-derived growth regulatory protein	Q16674	0.780847	0.677624	0.899795	0.000627238	0.00553071	0.667918	0.595522	0.749114	5.39058e-12	1.61962e-10
SERPINA3	2879-9	SL000248	a1-Antichymotrypsin	Alpha-1-antichymotrypsin	P01011	0.770889	0.671445	0.885061	0.000221916	0.00239339	0.67879	0.606044	0.760268	2.10023e-11	5.78439e-10
RTN4R	5105-2	SL005208	Nogo Receptor	Reticulon-4 receptor	Q9BZR6	1.60165	1.40744	1.82266	9.19e-13	1.2e-10	1.44004	1.29116	1.60608	5.76674e-11	1.52473e-09
SIGLEC7	2742-68	SL005218	Siglec-7	Sialic acid-binding Ig-like lectin 7	Q9Y286	1.32499	1.16572	1.50603	1.66e-05	0.000292257	1.44738	1.29475	1.61801	7.86249e-11	2.03808e-09
IBSP	3415-61	SL004660	BSP	Bone sialoprotein 2	P21815	0.764744	0.670787	0.87186	6.07e-05	0.00086053	0.689479	0.615948	0.771787	1.0324e-10	2.62467e-09
TFPI	3336-50	SL001998	TFPI	Tissue factor pathway inhibitor	P10646	1.46485	1.26908	1.69082	1.83e-07	6.13e-06	1.43819	1.28374	1.61121	3.62561e-10	8.87603e-09
NRXN1	5110-84	SL009054	NRX1B	Neurexin-1-beta	P58400	0.817729	0.713362	0.937365	0.00387161	0.0211379	0.696535	0.620904	0.781379	6.97913e-10	1.67753e-08
TF	4162-54	SL000601	Transferrin	Serotransferrin	P02787	0.727097	0.629942	0.839236	1.33e-05	0.000244705	0.699025	0.622677	0.784734	1.29592e-09	3.00563e-08
IGFBP4	2950-57	SL005171	IGFBP-4	Insulin-like growth factor-binding protein 4	P22692	1.54726	1.35721	1.76393	6.68e-11	6.23e-09	1.41707	1.26582	1.5864	1.42073e-09	3.2383e-08
TNNT2	5315-22	SL000052	Troponin T	Troponin T, cardiac muscle	P45379	1.4266	1.21965	1.66865	8.86e-06	0.000167637	1.49637	1.31293	1.70545	1.5408e-09	3.3949e-08
IGFBP1	2771-35	SL000462	IGFBP-1	Insulin-like growth factor-binding protein 1	P08833	0.568218	0.496852	0.649834	2.22e-16	7.24e-14	0.69866	0.621475	0.785431	1.93059e-09	4.11652e-08
IGHG1 IGHG2 IGHG3 IGHG4 IGK@ IGL@	2744-57	SL000467	IgG	Immunoglobulin G	P01857	0.790269	0.694702	0.898981	0.000344434	0.00345758	0.712645	0.637764	0.796319	2.21865e-09	4.5124e-08
CHRDL1	3362-61	SL009400	CRDL1	Chordin-like protein 1	Q9BU40	0.700623	0.60532	0.810932	1.85e-06	4.47e-05	0.686691	0.606063	0.778045	3.67358e-09	7.24846e-08
CCL25	2705-5	SL003197	TECK	C-C motif chemokine 25	O15444	1.38428	1.21437	1.57797	1.13e-06	2.96e-05	1.3854	1.24268	1.54452	4.183e-09	8.13224e-08
SELE	3470-1	SL001945	sE-Selectin	E-selectin	P16581	1.21974	1.06583	1.39589	0.00389855	0.0211379	1.39762	1.24513	1.56878	1.35178e-08	2.55294e-07
WFIKKN2	3235-50	SL010391	WFKN2	WAP, Kazal, immunoglobulin, Kunitz and NTR domain-containing protein 2	Q8TEU8	0.648417	0.566762	0.741837	2.82e-10	2.04e-08	0.72992	0.654269	0.814317	1.70614e-08	3.13266e-07
SERPINF1	9211-19	SL003066	PEDF	Pigment epithelium-derived factor	P36955	1.44168	1.24916	1.66386	5.67e-07	1.64e-05	1.40492	1.24812	1.58142	1.79603e-08	3.20859e-07
SLITRK5	4568-17	SL014070	SLIK5	SLIT and NTRK-like protein 5	O94991	0.758932	0.664546	0.866723	4.68e-05	0.000710773	0.71869	0.640634	0.806257	1.79035e-08	3.20859e-07
CA6	3352-80	SL010288	Carbonic anhydrase 6	Carbonic anhydrase 6	P23280	0.810477	0.705042	0.93168	0.00312491	0.0184525	0.728911	0.652317	0.814498	2.37369e-08	4.12896e-07
A2M	3708-62	SL000252	a2-Macroglobulin	Alpha-2-macroglobulin	P01023	0.791036	0.687432	0.910254	0.00106484	0.00837122	0.712336	0.631179	0.803928	3.87888e-08	6.49098e-07
SERPINC1	3344-60	SL000272	Antithrombin III	Antithrombin-III	P01008	0.643619	0.561891	0.737234	2.02e-10	1.65e-08	0.723598	0.644541	0.812351	4.23976e-08	6.91971e-07
YWHAE	14157-21	SL004984	14-3-3E	14-3-3 protein epsilon	P62258	0.82839	0.725317	0.946111	0.00548532	0.0279623	0.741059	0.664653	0.826249	6.75157e-08	1.08849e-06
NOTCH3	5108-72	SL005209	Notch-3	Neurogenic locus notch homolog protein 3	Q9UM47	0.694575	0.606711	0.795163	1.28e-07	4.52e-06	0.723249	0.642812	0.813751	7.19808e-08	1.14649e-06
ACY1	3343-1	SL005574	Aminoacylase-1	Aminoacylase-1	Q03154	1.56847	1.35662	1.81341	1.21e-09	7.15e-08	1.37179	1.22262	1.53917	7.36747e-08	1.1595e-06
RET	3220-40	SL010378	RET	Proto-oncogene tyrosine-protein kinase receptor Ret	P07949	1.70697	1.48961	1.95605	1.42e-14	2.32e-12	1.34309	1.20412	1.4981	1.20241e-07	1.84276e-06
DKK3	3607-71	SL009412	DKK3	Dickkopf-related protein 3	Q9UBP4	0.769976	0.66066	0.897379	0.00082008	0.00673593	0.73458	0.655241	0.823525	1.22665e-07	1.84276e-06
F2	5316-54	SL000558	Prothrombin	Prothrombin	P00734	0.789511	0.686721	0.907686	0.000897118	0.00722678	0.729094	0.648471	0.819742	1.26159e-07	1.87395e-06
TNFRSF1A	2654-19	SL001992	TNF sR-I	Tumor necrosis factor receptor superfamily member 1A	P19438	1.2694	1.10545	1.45767	0.00072267	0.00624559	1.39364	1.23156	1.57705	1.42643e-07	2.07224e-06
GDF2	4880-21	SL007756	GDF2	Growth/differentiation factor 2	Q9UK05	0.825372	0.72255	0.942827	0.00469517	0.0247064	0.754127	0.676682	0.840435	3.32104e-07	4.72087e-06
GCKR	5223-59	SL015728	GCKR	Glucokinase regulatory protein	Q14397	1.17803	1.04296	1.3306	0.00836795	0.0377861	1.29652	1.17099	1.43549	5.78451e-07	8.0496e-06
CAST	3026-5	SL000338	Calpastatin	Calpastatin	P20810	0.787868	0.686427	0.904301	0.000697912	0.00607184	0.748076	0.667493	0.838387	5.99791e-07	8.17447e-06
GDF5	2752-62	SL004329	BMP-14	Growth/differentiation factor 5	P43026	0.781399	0.680159	0.897708	0.00049361	0.00463425	0.746623	0.665619	0.837486	6.14271e-07	8.28639e-06
TNFSF12	5939-42	SL004365	TWEAK	Tumor necrosis factor ligand superfamily member 12	O43508	0.799129	0.693631	0.920671	0.00190828	0.0125773	0.752147	0.671908	0.841968	7.47794e-07	9.98569e-06
GP1BA	4990-87	SL006460	GP1BA	Platelet glycoprotein Ib alpha chain	P07359	0.807365	0.707594	0.921205	0.00147547	0.0105971	0.758587	0.67966	0.846678	8.25876e-07	1.081e-05
PLAT	2212-69	SL000053	tPA	Tissue-type plasminogen activator	P00750	1.68516	1.48614	1.91084	4.44e-16	1.16e-13	1.31175	1.17465	1.46485	1.45042e-06	1.82614e-05
GNS	3616-3	SL008504	GNS	N-acetylglucosamine-6-sulfatase	P15586	1.2385	1.08763	1.41028	0.00124876	0.00936572	1.29861	1.1676	1.44432	1.46705e-06	1.82966e-05
MMP7	2789-26	SL000525	MMP-7	Matrilysin	P09237	1.27894	1.10771	1.47663	0.000793926	0.00673593	1.30739	1.17148	1.45906	1.70094e-06	2.06298e-05
GPD1	11081-1	SL007151	GPDA	Glycerol-3-phosphate dehydrogenase [NAD(+)], cytoplasmic	P21695	1.27203	1.11106	1.45631	0.000490869	0.00463425	1.28651	1.15996	1.42686	1.85427e-06	2.2285e-05
RARRES2	3079-62	SL005152	TIG2	Retinoic acid receptor responder protein 2	Q99969	1.36524	1.20025	1.55291	2.16e-06	5.04e-05	1.31127	1.17158	1.46762	2.4153e-06	2.8009e-05
LGALS4	2982-82	SL005165	Galectin-4	Galectin-4	P56470	1.24639	1.10594	1.40468	0.000305327	0.00313742	1.29283	1.16193	1.43848	2.41333e-06	2.8009e-05
MMP2	4160-49	SL000124	MMP-2	72 kDa type IV collagenase	P08253	0.833343	0.725399	0.957349	0.0100012	0.0421019	0.771356	0.691936	0.859893	2.83035e-06	3.25367e-05
S100A9	5339-49	SL004477	calgranulin B	Protein S100-A9	P06702	1.31783	1.13865	1.52519	0.00021438	0.00235098	1.28075	1.1542	1.42118	3.13898e-06	3.54678e-05
SOD3	8463-2	SL003672	SOD3	Extracellular superoxide dismutase [Cu-Zn]	P08294	0.686074	0.597985	0.787139	7.71e-08	2.96e-06	0.757374	0.67379	0.851326	3.19663e-06	3.58131e-05
SERPINA1	3580-25	SL000249	a1-Antitrypsin	Alpha-1-antitrypsin	P01009	0.743012	0.652711	0.845805	7.02e-06	0.00013677	0.76863	0.687577	0.859238	3.68749e-06	4.06239e-05
CD163	5028-59	SL005764	sCD163	Scavenger receptor cysteine-rich type 1 protein M130	Q86VB7	1.26047	1.10559	1.43706	0.000539135	0.00495473	1.29101	1.1559	1.44192	5.93542e-06	6.17844e-05
LMAN2	7638-30	SL005403	Lectin, mannose-binding 2	Vesicular integral-membrane protein VIP36	Q12907	1.30959	1.15449	1.48552	2.75e-05	0.000447901	1.2836	1.15124	1.43117	6.90604e-06	6.9693e-05
EPHB6	5078-82	SL008414	EphB6	Ephrin type-B receptor 6	O15197	0.837894	0.733486	0.957164	0.00919436	0.039906	0.770566	0.687489	0.863683	7.54192e-06	7.49656e-05
IL16	2774-10	SL000474	IL-16	Interleukin-16	Q14005	1.16249	1.03458	1.30621	0.0113565	0.0461688	1.27376	1.14481	1.41723	8.85709e-06	8.73811e-05
C5	2851-63	SL000320	C5a	C5a anaphylatoxin	P01031	1.41717	1.22633	1.63771	2.3e-06	5.28e-05	1.27541	1.14398	1.42193	1.16367e-05	0.000113116
FTH1 FTL	5934-1	SL000420	Ferritin	Ferritin	P02794 P02792	1.22743	1.06891	1.40946	0.00367903	0.0203438	1.28727	1.14933	1.44176	1.26077e-05	0.000121659
IFNGR2	9180-6	SL007217	INGR2	Interferon gamma receptor 2	P38484	1.20823	1.06034	1.37675	0.00451893	0.0238753	1.28091	1.14612	1.43155	1.2766e-05	0.000122295
ANXA5	14158-17	SL003848	Annexin V	Annexin A5	P08758	0.798774	0.691773	0.922327	0.00219971	0.0140031	0.776275	0.692717	0.869911	1.31002e-05	0.000124594
SERPINE1	2925-9	SL000006	PAI-1	Plasminogen activator inhibitor 1	P05121	1.25856	1.10378	1.43504	0.000593019	0.00537424	1.26583	1.13822	1.40775	1.37533e-05	0.00012987
ADAMTS15	4533-76	SL012740	ATS15	A disintegrin and metalloproteinase with thrombospondin motifs 15	Q8TE58	1.31415	1.14914	1.50286	6.59e-05	0.000905595	1.26717	1.13859	1.41027	1.44123e-05	0.000135128
NTRK3	2658-27	SL004639	TrkC	NT-3 growth factor receptor	Q16288	0.66745	0.587719	0.757999	4.7e-10	3.23e-08	0.781457	0.698575	0.874173	1.62671e-05	0.000151444
THBS2	3339-33	SL007206	TSP2	Thrombospondin-2	P35442	1.31572	1.15203	1.50268	5.17e-05	0.000758693	1.28249	1.14515	1.4363	1.66825e-05	0.000153154
CFI	2567-5	SL003328	Factor I	Complement factor I	P05156	1.40187	1.21936	1.6117	2.07e-06	4.9e-05	1.28072	1.1437	1.43416	1.82103e-05	0.000164891
DBNL	4978-54	SL011628	DBNL	Drebrin-like protein	Q9UJU6	0.819978	0.712646	0.943476	0.00555701	0.0279996	0.786111	0.703716	0.878153	2.04441e-05	0.000183858
SELL	4831-4	SL002823	sL-Selectin	L-Selectin	P14151	0.768504	0.675432	0.874401	6.4e-05	0.000887937	0.785976	0.701919	0.880099	3.00436e-05	0.000259593
IL2RA	3151-6	SL003305	IL-2 sRa	Interleukin-2 receptor subunit alpha	P01589	1.25657	1.10628	1.42728	0.000441331	0.00429803	0.801248	0.722003	0.889189	3.04164e-05	0.000261107
CRP	4337-49	SL000051	CRP	C-reactive protein	P02741	1.5284	1.34264	1.73986	1.4e-10	1.21e-08	1.24491	1.12261	1.38054	3.29707e-05	0.000281209
SPP1	13113-7	SL002688	Osteopontin	Osteopontin	P10451	0.747535	0.655524	0.852461	1.41e-05	0.000253305	0.786411	0.701673	0.881382	3.61914e-05	0.000304746
ADIPOQ	3554-24	SL004258	Adiponectin	Adiponectin	Q15848	0.596936	0.51732	0.688805	1.61e-12	1.92e-10	0.772341	0.680435	0.876661	6.43192e-05	0.000506131
DKK4	3365-7	SL010612	Dkk-4	Dickkopf-related protein 4	Q9UBT3	0.780733	0.687833	0.886181	0.000128469	0.00153809	0.78488	0.69639	0.884615	7.22428e-05	0.000561794
TGFBR3	3009-3	SL005059	TGF-b R III	Transforming growth factor beta receptor type 3	Q03167	0.768144	0.67269	0.877143	9.77e-05	0.00125022	0.797643	0.713109	0.892199	7.63414e-05	0.000586764
IL1RAP	2630-12	SL004588	IL-1 R AcP	Interleukin-1 Receptor accessory protein	Q9NPH3	0.839014	0.742582	0.94797	0.00483675	0.0253493	0.811634	0.731514	0.900528	8.29248e-05	0.000630038
FTCD	9213-24	SL018900	FTCD	Formimidoyltransferase-cyclodeaminase	O95954	1.49493	1.30635	1.71073	5.09e-09	2.55e-07	1.24697	1.11505	1.39449	0.000109402	0.000819338
TGFB3	3520-58	SL000089	TGF-b3	Transforming growth factor beta-3	P10600	1.37893	1.21127	1.5698	1.19e-06	3.04e-05	1.23376	1.10912	1.3724	0.000110639	0.000819338
OPCML	3634-5	SL005491	OBCAM	Opioid-binding protein/cell adhesion molecule	Q14982	1.2723	1.1223	1.44234	0.000168131	0.00194169	1.24564	1.11372	1.39319	0.000120195	0.000873066
PROS1	2700-56	SL000049	Protein S	Vitamin K-dependent protein S	P07225	1.33657	1.16437	1.53424	3.75e-05	0.000596836	1.24437	1.11283	1.39146	0.00012535	0.000905534
SIGLEC6	2741-22	SL005217	Siglec-6	Sialic acid-binding Ig-like lectin 6	O43699	1.25676	1.09958	1.43642	0.0008012	0.00673593	1.23359	1.10598	1.37593	0.000164626	0.00113946
RGMB	3331-8	SL010468	RGMB	RGM domain family member B	Q6NW40	0.843569	0.739942	0.961709	0.0109653	0.0448582	0.800204	0.712621	0.898552	0.000164124	0.00113946
SERPIND1	3316-58	SL004466	Heparin cofactor II	Heparin cofactor 2	P05546	1.22936	1.06288	1.42192	0.00541287	0.0278102	1.24548	1.11088	1.3964	0.000168629	0.00116108
SET	5364-7	SL007336	SET	Protein SET	Q01105	1.44958	1.23948	1.6953	3.36e-06	7.2e-05	1.23778	1.10506	1.38644	0.00022755	0.00152701
NOTCH2	5106-52	SL007356	NOTC2	Neurogenic locus notch homolog protein 2	Q04721	1.24759	1.09876	1.41657	0.000642208	0.00562471	1.2052	1.08776	1.33533	0.000359679	0.00231949
PTH	5954-62	SL003970	PTH	Parathyroid hormone	P01270	1.24177	1.09943	1.40255	0.000490536	0.00463425	0.8153	0.728393	0.912577	0.000384163	0.00246536
IDS	3198-4	SL008639	IDS	Iduronate 2-sulfatase	P22304	0.723748	0.63868	0.820147	4.02e-07	1.22e-05	0.829236	0.745974	0.921791	0.000523573	0.0032804
RPS7	3864-5	SL011528	RS7	40S ribosomal protein S7	P62081	1.19358	1.05374	1.35197	0.00538038	0.0277525	1.19994	1.08195	1.33079	0.000557318	0.00345904
NRG4	14139-16	SL007828	NRG4	Neuregulin-4	Q8WWG1	1.27187	1.12791	1.4342	8.71e-05	0.00113727	0.828788	0.744798	0.922249	0.000571823	0.00353248
CA3	3799-11	SL004867	Carbonic anhydrase III	Carbonic anhydrase 3	P07451	1.36875	1.17193	1.59863	7.41e-05	0.000996319	1.22851	1.09239	1.38159	0.000593034	0.00361286
FAM107B	4774-62	SL016129	FAM107B	Protein FAM107B	Q9H098	1.338	1.15703	1.54728	8.6e-05	0.00113347	1.21067	1.08541	1.35039	0.000601912	0.00365013
TIMP2	2278-61	SL000592	TIMP-2	Metalloproteinase inhibitor 2	P16035	0.733933	0.643766	0.836728	3.74e-06	7.75e-05	0.825789	0.739879	0.921674	0.000637367	0.00383
APCS	2474-54	SL000573	SAP	Serum amyloid P-component	P02743	1.41933	1.23717	1.62832	5.83e-07	1.65e-05	1.22375	1.08905	1.3751	0.000689117	0.00408526
NTN4	3327-27	SL007673	NET4	Netrin-4	Q9HB63	1.2925	1.13767	1.46839	8.1e-05	0.00107911	1.19511	1.07479	1.3289	0.000994144	0.00556889
IL2	3070-1	SL000478	IL-2	Interleukin-2	P60568	1.23587	1.09132	1.39957	0.000847359	0.00691127	1.19958	1.07559	1.33786	0.00107892	0.00596792
SCGB2A1	5001-6	SL001973	Mammaglobin 2	Mammaglobin-B	O75556	0.828111	0.721514	0.950456	0.00730272	0.0344045	0.836542	0.749709	0.933432	0.00141308	0.00765609
LTA4H	3204-2	SL007100	LKHA4	Leukotriene A-4 hydrolase	P09960	0.839943	0.740776	0.952386	0.00650799	0.0315722	0.830908	0.741524	0.931066	0.00142279	0.00767724
MYBPC1	7648-9	SL017328	MYPC1	Myosin-binding protein C, slow-type	Q00872	1.33943	1.14796	1.56285	0.000204731	0.00228354	1.19971	1.07165	1.34307	0.0015691	0.00843233
CCL18	3044-3	SL003323	PARC	C-C motif chemokine 18	P55774	1.23294	1.08488	1.40121	0.00133633	0.00979729	1.18917	1.06579	1.32683	0.00193488	0.00996921
COMMD7	2823-7	SL004704	COMMD7	COMM domain-containing protein 7	Q86VX2	0.799943	0.697775	0.917069	0.00136605	0.0099039	0.854234	0.772713	0.944355	0.00207845	0.0105662
TIMP3	2480-58	SL003043	TIMP-3	Metalloproteinase inhibitor 3	P35625	0.801819	0.701913	0.915945	0.00114152	0.00861089	0.833125	0.741469	0.936112	0.00213923	0.0107866
CLEC4M	3030-3	SL005158	DC-SIGNR	C-type lectin domain family 4 member M	Q9H2X3	1.21835	1.05505	1.40692	0.0071494	0.0338566	0.840006	0.749817	0.941044	0.00262498	0.0127582
VEGFA	2597-8	SL000002	VEGF	Vascular endothelial growth factor A	P15692	1.21972	1.06801	1.39297	0.00337917	0.0194265	1.18053	1.05903	1.31597	0.00274536	0.0132459
KLKB1	4152-58	SL000545	Prekallikrein	Plasma kallikrein	P03952	1.342	1.18259	1.5229	5.13e-06	0.000103	1.18301	1.0583	1.32241	0.00310743	0.0148304
GFRA1	3314-74	SL004858	GFRa-1	GDNF family receptor alpha-1	P56159	1.49154	1.31407	1.69298	6.18e-10	4.03e-08	1.17283	1.05483	1.30404	0.00321375	0.0152279
PRKCG	5476-66	SL000556	PKC-G	Protein kinase C gamma type	P05129	1.19248	1.05161	1.35222	0.00605944	0.0296164	1.17134	1.05379	1.302	0.00337862	0.0158952
FGF7	4487-1	SL001691	FGF7	Fibroblast growth factor 7	P21781	0.750669	0.653556	0.862212	4.96e-05	0.000735864	0.852888	0.76639	0.949148	0.00353952	0.0164184
LTF	2780-35	SL000496	Lactoferrin	Lactotransferrin	P02788	1.18491	1.03854	1.35191	0.0116632	0.0472687	0.850542	0.762611	0.948611	0.00364321	0.0168403
LGALS3BP	5000-52	SL006522	LG3BP	Galectin-3-binding protein	Q08380	1.40041	1.22611	1.59947	6.84e-07	1.86e-05	1.16867	1.05162	1.29874	0.00379457	0.0173578
LY9	3324-51	SL007674	LY9	T-lymphocyte surface antigen Ly-9	Q9HBG7	0.83569	0.730452	0.95609	0.00895272	0.0396044	1.17285	1.05258	1.30685	0.00387191	0.0176506
TNFRSF18	5526-53	SL004859	GITR	Tumor necrosis factor receptor superfamily member 18	Q9Y5U5	1.21776	1.06829	1.38814	0.00319141	0.0186762	1.1576	1.04483	1.28253	0.00513188	0.0226145
IL1R1	2991-9	SL001997	IL-1 sRI	Interleukin-1 receptor type 1	P14778	0.711805	0.624469	0.811355	3.58e-07	1.11e-05	1.18285	1.05092	1.33133	0.00538247	0.0234839
HIST1H3A	14146-92	SL008158	H31	Histone H3.1	P68431	0.800088	0.701796	0.912147	0.000853302	0.00691651	0.856975	0.768182	0.956031	0.00568054	0.024564
IL25	4137-57	SL004351	IL-17E	Interleukin-25	Q9H293	1.23657	1.08605	1.40796	0.00134398	0.00979828	1.1623	1.04391	1.29412	0.0060705	0.0259715
KIT	2475-1	SL004010	SCF sR	Mast/stem cell growth factor receptor Kit	P10721	0.82019	0.71075	0.946482	0.00667365	0.032256	0.85726	0.767636	0.957349	0.0062645	0.0266191
C3	5803-24	SL003362	C3d	Complement C3d fragment	P01024	1.32918	1.15772	1.52604	5.38e-05	0.000771991	1.16494	1.0413	1.30326	0.00765365	0.0316192
SPINT2	2843-13	SL001897	SPINT2	Kunitz-type protease inhibitor 2	O43291	0.796022	0.690941	0.917085	0.00158713	0.011076	1.15214	1.03701	1.28004	0.00837549	0.0338605
CDH1	2501-51	SL000055	Cadherin E	Cadherin-1	P12830	1.25863	1.09632	1.44498	0.00109319	0.00844153	1.16495	1.03897	1.30621	0.00893039	0.0357757
CHL1	3601-54	SL008936	CHL1	Neural cell adhesion molecule L1-like protein	O00533	0.712593	0.620607	0.818214	1.55e-06	3.81e-05	0.864451	0.774445	0.964918	0.00941576	0.0374929
GHR	2948-58	SL005168	Growth hormone receptor	Growth hormone receptor	P10912	1.70473	1.50036	1.93693	2.22e-16	7.24e-14	1.16106	1.03534	1.30204	0.0106524	0.0414189
ABL2	5261-13	SL010488	ABL2	Abelson tyrosine-protein kinase 2	P42684	1.18926	1.0472	1.35059	0.0075738	0.0355533	0.872402	0.785067	0.969452	0.0111989	0.0430376
MAP2K2	3628-3	SL010501	MP2K2	Dual specificity mitogen-activated protein kinase kinase 2	P36507	1.29113	1.11783	1.49131	0.000511514	0.00476804	1.15949	1.03321	1.3012	0.011896	0.0455842
ROR1	8474-6	SL006114	ROR1	Tyrosine-protein kinase transmembrane receptor ROR1	Q01973	0.755257	0.66371	0.859431	2.06e-05	0.000349932	0.865326	0.771667	0.970352	0.0133272	0.049847
Hazard ratios obtained from Cox proportional hazards models and odds ratios obtained from logistic regression models adjusted for clinical covariables as listed. FDR q values that are <0.05 after adjusting for the 1,305 proteins measured are bolded and italicized.

[truncated: 7 more sheets: Supp Tbl11, Supp Tbl12, Supp Tbl13, Supp Tbl14, Supp Tbl15, Supp Tbl16, Supp Tbl17]
